# Supplementary material for: Comparative transcriptome analysis unveiling reactive oxygen species scavenging system of Sonneratia caseolaris under salinity stress
Source: Front Plant Sci. 2022 Jul 25;13:953450. doi: 10.3389/fpls.2022.953450 (PMC9358527; doi:10.3389/fpls.2022.953450)
Supplement: Supplementary file 5 [file Table_5.XLSX]

## Sheet: Sheet1
Supplementary Dataset 2. Gene co-expression clusters of the downregulated DEGs in S. caseolaris under 3.0% NaCl stress.
gene_id	Clusters	nr_description	Control_vs_3.0% NaCl_fc(N30/CK)	Control_vs_3.0% NaCl_log2fc(N30/CK)	Control_vs_3.0% NaCl_pvalue	Control_vs_3.0% NaCl_padjust	Control_vs_3.0% NaCl_significant	Control_vs_3.0% NaCl_regulate	go	KO_id	KO_name	paths	cog	cog_description	swissprot	pfam
TRINITY_DN6348_c0_g2	Cluster 2	uncharacterized protein LOC116203513 isoform X1 [Punica granatum]	0.17795	-2.49045	7.5607e-40	1.97108e-36	yes	down	GO:0005634(cellular_component:nucleus)				ENOG410YARK(S:Function unknown)	ENOG410YARK(CCT motif)		PF06203(CCT:CCT motif)
TRINITY_DN4891_c1_g1	Cluster 2	uncharacterized protein LOC116196061 [Punica granatum]	0.334819	-1.57854	7.17734e-38	1.40335e-34	yes	down	GO:0005634(cellular_component:nucleus)				ENOG410YARK(S:Function unknown)	ENOG410YARK(CCT motif)
TRINITY_DN1720_c0_g1	Cluster 2	mediator of RNA polymerase II transcription subunit 33A [Punica granatum]	0.360746	-1.47094	6.29597e-36	9.23265e-33	yes	down	GO:0016592(cellular_component:mediator complex); GO:0016021(cellular_component:integral component of membrane); GO:2000762(biological_process:regulation of phenylpropanoid metabolic process)				ENOG410XPER(S:Function unknown)	ENOG410XPER(Component of the Mediator complex, a coactivator involved in the regulated transcription of nearly all RNA polymerase II-dependent genes. Mediator functions as a bridge to convey information from gene-specific regulatory proteins to the basal RNA polymerase II transcription machinery. The Mediator complex, having a compact conformation in its free form, is recruited to promoters by di…	sp|Q9LUG9|MD33A_ARATH(Mediator of RNA polymerase II transcription subunit 33A OS=Arabidopsis thaliana OX=3702 GN=MED33A PE=1 SV=1)
TRINITY_DN3127_c0_g2	Cluster 2	PREDICTED: somatic embryogenesis receptor kinase 1-like isoform X1 [Nicotiana attenuata]	0.40462	-1.30536	4.33656e-26	2.90711e-23	yes	down	GO:0016301(molecular_function:kinase activity)				COG4886(S:Function unknown)	COG4886(leucine Rich Repeat)	sp|B8ABC2|LRR1_ORYSI(Leucine-rich repeat protein 1 OS=Oryza sativa subsp. indica OX=39946 GN=LRR1 PE=3 SV=1)	PF08263(LRRNT_2:Leucine rich repeat N-terminal domain)
TRINITY_DN1636_c1_g1	Cluster 2	xyloglucan endotransglucosylase/hydrolase 2 [Punica granatum]	0.333861	-1.58268	2.12003e-25	1.34439e-22	yes	down	GO:0042546(biological_process:cell wall biogenesis); GO:0005618(cellular_component:cell wall); GO:0016021(cellular_component:integral component of membrane); GO:0048046(cellular_component:apoplast); GO:0071555(biological_process:cell wall organization); GO:0016762(molecular_function:xyloglucan:xyloglucosyl transferase activity); GO:0004553(molecular_function:hydrolase activity, hydrolyzing O-glyc…	K08235	E2.4.1.207		COG2273(G:Carbohydrate transport and metabolism)	COG2273(hydrolase family 16)	sp|P35694|XTH2_SOYBN(Xyloglucan endotransglucosylase/hydrolase 2 OS=Glycine max OX=3847 PE=2 SV=1)	PF00722(Glyco_hydro_16:Glycosyl hydrolases family 16); PF06955(XET_C:Xyloglucan endo-transglycosylase (XET) C-terminus)
TRINITY_DN7060_c0_g1	Cluster 2	transcription factor MYB123-like [Punica granatum]	0.319094	-1.64795	7.04468e-25	4.03145e-22	yes	down	GO:0005634(cellular_component:nucleus); GO:0003677(molecular_function:DNA binding)	K09422	MYBP		COG5147(K:Transcription)	COG5147(Myblike DNAbinding domain containing protein)	sp|A0A4D6Q4S0|MYB2_CROXC(Transcription factor MYB1 OS=Crocosmia x crocosmiiflora OX=1053288 GN=MYB2 PE=2 SV=1)	PF00249(Myb_DNA-binding:Myb-like DNA-binding domain); PF13921(Myb_DNA-bind_6:Myb-like DNA-binding domain)
TRINITY_DN13076_c1_g1	Cluster 2	hypothetical protein CRG98_010967 [Punica granatum]	0.288858	-1.79157	1.09229e-24	5.82464e-22	yes	down	GO:0098869(biological_process:cellular oxidant detoxification)				ENOG410ZF0Z(S:Function unknown)	ENOG410ZF0Z(-)	sp|Q8L8S2|LSU4_ARATH(Protein RESPONSE TO LOW SULFUR 4 OS=Arabidopsis thaliana OX=3702 GN=LSU4 PE=2 SV=1)	PF11802(CENP-K:Centromere-associated protein K)
TRINITY_DN26537_c0_g1	Cluster 2	hypothetical protein CDL15_Pgr011031 [Punica granatum]	0.17164	-2.54254	3.14772e-24	1.60554e-21	yes	down	GO:0016021(cellular_component:integral component of membrane)				COG4886(S:Function unknown)	COG4886(leucine Rich Repeat)	sp|Q9C637|RLP6_ARATH(Receptor-like protein 6 OS=Arabidopsis thaliana OX=3702 GN=RLP6 PE=3 SV=1)	PF13855(LRR_8:Leucine rich repeat); PF12799(LRR_4:Leucine Rich repeats (2 copies)); PF08263(LRRNT_2:Leucine rich repeat N-terminal domain)
TRINITY_DN4464_c0_g2	Cluster 2	gamma-glutamylcyclotransferase 2-1-like [Punica granatum]	0.443494	-1.17301	6.68318e-24	3.33633e-21	yes	down	GO:0005737(cellular_component:cytoplasm); GO:0006751(biological_process:glutathione catabolic process); GO:0016021(cellular_component:integral component of membrane); GO:0016740(molecular_function:transferase activity); GO:0003839(molecular_function:gamma-glutamylcyclotransferase activity)	K22596	GGCT	map00480(Glutathione metabolism)	COG3703(P:Inorganic ion transport and metabolism)	COG3703(cation transport)	sp|Q8GY54|GCT21_ARATH(Gamma-glutamylcyclotransferase 2-1 OS=Arabidopsis thaliana OX=3702 GN=GGCT2;1 PE=1 SV=1)	PF04752(ChaC:ChaC-like protein)
TRINITY_DN7803_c0_g3	Cluster 2	hypothetical protein CDL15_Pgr014797 [Punica granatum]	0.276551	-1.85438	2.55669e-23	1.19975e-20	yes	down	GO:0006355(biological_process:regulation of transcription, DNA-templated); GO:0005634(cellular_component:nucleus); GO:0003677(molecular_function:DNA binding)				ENOG410YEQW(S:Function unknown)	ENOG410YEQW(Zinc finger protein)	sp|Q9FM03|DOF56_ARATH(Dof zinc finger protein DOF5.6 OS=Arabidopsis thaliana OX=3702 GN=DOF5.6 PE=2 SV=2)	PF02701(zf-Dof:Dof domain, zinc finger)
TRINITY_DN7763_c0_g1	Cluster 2	protein SIEVE ELEMENT OCCLUSION B-like [Punica granatum]	0.362949	-1.46216	3.71593e-22	1.64503e-19	yes	down	GO:0010088(biological_process:phloem development)				ENOG4111ADI(S:Function unknown)	ENOG4111ADI(Mediator complex subunit 28)	sp|Q9SS87|SEOB_ARATH(Protein SIEVE ELEMENT OCCLUSION B OS=Arabidopsis thaliana OX=3702 GN=SEOB PE=1 SV=1)	PF14576(SEO_N:Sieve element occlusion N-terminus); PF14577(SEO_C:Sieve element occlusion C-terminus)
TRINITY_DN6185_c0_g1	Cluster 2	hypothetical protein CRG98_000826 [Punica granatum]	0.494399	-1.01625	4.21199e-22	1.83011e-19	yes	down	GO:0022857(molecular_function:transmembrane transporter activity); GO:0016021(cellular_component:integral component of membrane)				COG2233(F:Nucleotide transport and metabolism)	COG2233(permease)	sp|Q3E7D0|NAT12_ARATH(Nucleobase-ascorbate transporter 12 OS=Arabidopsis thaliana OX=3702 GN=NAT12 PE=1 SV=3)	PF00860(Xan_ur_permease:Permease family)
TRINITY_DN27964_c0_g1	Cluster 2	uncharacterized protein LOC116208715 [Punica granatum]	0.244673	-2.03107	1.73971e-21	6.69161e-19	yes	down					ENOG410YUXP(S:Function unknown)	ENOG410YUXP(Pfam:DUF584)		PF04520(Senescence_reg:Senescence regulator)
TRINITY_DN6192_c0_g3	Cluster 2	E3 ubiquitin-protein ligase MIEL1-like [Manihot esculenta]	0.202797	-2.30189	7.12594e-19	2.14354e-16	yes	down	GO:0008270(molecular_function:zinc ion binding)	K10144	RCHY1, PIRH2	map04120(Ubiquitin mediated proteolysis)	ENOG410XXHF(S:Function unknown)	ENOG410XXHF(ring finger and CHY zinc finger)	sp|Q8VZK0|MIEL1_ARATH(E3 ubiquitin-protein ligase MIEL1 OS=Arabidopsis thaliana OX=3702 GN=MIEL1 PE=1 SV=1)	PF05495(zf-CHY:CHY zinc finger); PF13923(zf-C3HC4_2:Zinc finger, C3HC4 type (RING finger)); PF13639(zf-RING_2:Ring finger domain); PF00097(zf-C3HC4:Zinc finger, C3HC4 type (RING finger)); PF13445(zf-RING_UBOX:RING-type zinc-finger); PF14634(zf-RING_5:zinc-RING finger domain)
TRINITY_DN7333_c0_g2	Cluster 2	uncharacterized protein LOC116198726 [Punica granatum]	0.190384	-2.39302	4.99038e-18	1.3615e-15	yes	down					ENOG410XUYC(S:Function unknown)	ENOG410XUYC(Glyoxalase Bleomycin resistance protein (Dioxygenase)
TRINITY_DN6245_c0_g1	Cluster 2	callose synthase 7 isoform X1 [Punica granatum]	0.417731	-1.25936	1.61936e-17	4.08548e-15	yes	down	GO:0003843(molecular_function:1,3-beta-D-glucan synthase activity); GO:0006075(biological_process:(1->3)-beta-D-glucan biosynthetic process); GO:0016021(cellular_component:integral component of membrane); GO:0000148(cellular_component:1,3-beta-D-glucan synthase complex)	K11000	CALS		ENOG410XQ8V(S:Function unknown)	ENOG410XQ8V(synthase)	sp|Q9SHJ3|CALS7_ARATH(Callose synthase 7 OS=Arabidopsis thaliana OX=3702 GN=CALS7 PE=3 SV=3)	PF02364(Glucan_synthase:1,3-beta-glucan synthase component); PF14288(FKS1_dom1:1,3-beta-glucan synthase subunit FKS1, domain-1); PF04652(Vta1:Vta1 like)
TRINITY_DN7342_c0_g1	Cluster 2	ABC transporter G family member 22-like isoform X1 [Punica granatum]	0.471811	-1.08372	2.00069e-17	4.88982e-15	yes	down	GO:0042626(molecular_function:ATPase activity, coupled to transmembrane movement of substances); GO:0016887(molecular_function:ATPase activity); GO:0010148(biological_process:transpiration); GO:0016021(cellular_component:integral component of membrane); GO:0009414(biological_process:response to water deprivation); GO:0005886(cellular_component:plasma membrane); GO:0055085(biological_process:trans…				COG1131(V:Defense mechanisms)	COG1131((ABC) transporter)	sp|Q93YS4|AB22G_ARATH(ABC transporter G family member 22 OS=Arabidopsis thaliana OX=3702 GN=ABCG22 PE=1 SV=1)	PF01061(ABC2_membrane:ABC-2 type transporter); PF19055(ABC2_membrane_7:ABC-2 type transporter); PF12698(ABC2_membrane_3:ABC-2 family transporter protein)
TRINITY_DN4914_c0_g1	Cluster 2	IQ domain-containing protein IQM3-like isoform X1 [Punica granatum]	0.389836	-1.35906	4.69949e-17	1.09172e-14	yes	down					ENOG410XYBD(S:Function unknown); ENOG4111I0K(S:Function unknown)	ENOG410XYBD(-); ENOG4111I0K(calmodulin-binding family)	sp|Q9LFA4|IQM3_ARATH(IQ domain-containing protein IQM3 OS=Arabidopsis thaliana OX=3702 GN=IQM3 PE=2 SV=1)
TRINITY_DN2867_c0_g2	Cluster 2	hypothetical protein CRG98_044643 [Punica granatum]	0.366349	-1.44871	9.67498e-17	2.16194e-14	yes	down	GO:0018230(biological_process:peptidyl-L-cysteine S-palmitoylation); GO:0005794(cellular_component:Golgi apparatus); GO:0005783(cellular_component:endoplasmic reticulum); GO:0016021(cellular_component:integral component of membrane); GO:0006612(biological_process:protein targeting to membrane); GO:0019706(molecular_function:protein-cysteine S-palmitoyltransferase activity); GO:0016491(molecular_f…	K16675	ZDHHC9_14_18				sp|Q9M1K5|ZDH13_ARATH(Probable protein S-acyltransferase 4 OS=Arabidopsis thaliana OX=3702 GN=PAT04 PE=2 SV=1)	PF01529(DHHC:DHHC palmitoyltransferase)
TRINITY_DN9162_c0_g5	Cluster 2	hypothetical protein CDL15_Pgr024032 [Punica granatum]	0.363105	-1.46154	1.65598e-16	3.50038e-14	yes	down	GO:0005618(cellular_component:cell wall); GO:0009664(biological_process:plant-type cell wall organization); GO:0016020(cellular_component:membrane); GO:0005576(cellular_component:extracellular region)						sp|O48818|EXPA4_ARATH(Expansin-A4 OS=Arabidopsis thaliana OX=3702 GN=EXPA4 PE=1 SV=1)	PF01357(Expansin_C:Expansin C-terminal domain); PF03330(DPBB_1:Lytic transglycolase)
TRINITY_DN9960_c0_g1	Cluster 2	uncharacterized protein LOC116211913 [Punica granatum]	0.358618	-1.47948	3.10715e-16	6.28475e-14	yes	down					ENOG4111EXG(S:Function unknown)	ENOG4111EXG(Plant protein of unknown function (DUF936))		PF06075(DUF936:Plant protein of unknown function (DUF936))
TRINITY_DN8331_c0_g1	Cluster 2	uncharacterized protein LOC116215384 isoform X1 [Punica granatum]	0.196128	-2.35013	4.01006e-16	7.90656e-14	yes	down	GO:0016021(cellular_component:integral component of membrane)				ENOG410ZJZP(S:Function unknown)	ENOG410ZJZP(Nhl repeatcontaining protein)		PF01436(NHL:NHL repeat)
TRINITY_DN27117_c0_g1	Cluster 2	protein DMP2 [Punica granatum]	0.126908	-2.97814	7.37742e-16	1.38477e-13	yes	down	GO:0016021(cellular_component:integral component of membrane); GO:0010256(biological_process:endomembrane system organization)				ENOG410YF1H(S:Function unknown)	ENOG410YF1H(Protein of unknown function (DUF679))	sp|Q9LVF1|DMP2_ARATH(Protein DMP2 OS=Arabidopsis thaliana OX=3702 GN=DMP2 PE=2 SV=1)	PF05078(DUF679:Protein of unknown function (DUF679))
TRINITY_DN7516_c0_g1	Cluster 2	uncharacterized protein LOC110095758 isoform X1 [Dendrobium catenatum]	0.0012764	-9.61371	7.69057e-16	1.43209e-13	yes	down								PF03004(Transposase_24:Plant transposase (Ptta/En/Spm family))
TRINITY_DN2608_c0_g1	Cluster 2	acyl-CoA-binding domain-containing protein 1-like isoform X1 [Punica granatum]	0.367867	-1.44274	8.33199e-16	1.53932e-13	yes	down	GO:0000062(molecular_function:fatty-acyl-CoA binding)				COG4281(I:Lipid transport and metabolism)	COG4281(Acyl-CoA binding domain containing)	sp|Q9STP8|ACBP2_ARATH(Acyl-CoA-binding domain-containing protein 2 OS=Arabidopsis thaliana OX=3702 GN=ACBP2 PE=1 SV=1)	PF00887(ACBP:Acyl CoA binding protein)
TRINITY_DN568_c0_g1	Cluster 2	lanC-like protein GCL1 [Punica granatum]	0.47962	-1.06004	2.7114e-15	4.54411e-13	yes	down	GO:0003824(molecular_function:catalytic activity); GO:0005886(cellular_component:plasma membrane)				ENOG410XQIA(S:Function unknown)	ENOG410XQIA(glutathione binding)	sp|Q9FJN7|GCL1_ARATH(LanC-like protein GCL1 OS=Arabidopsis thaliana OX=3702 GN=GCL1 PE=2 SV=1)	PF05147(LANC_like:Lanthionine synthetase C-like protein)
TRINITY_DN7936_c0_g1	Cluster 2	uncharacterized protein LOC116195721 [Punica granatum]	0.475283	-1.07314	4.89733e-15	7.87028e-13	yes	down	GO:0016021(cellular_component:integral component of membrane)				ENOG411195B(S:Function unknown)	ENOG411195B(-)
TRINITY_DN6937_c0_g1	Cluster 2	protein SIEVE ELEMENT OCCLUSION B-like [Punica granatum]	0.312194	-1.67949	1.36176e-14	2.10204e-12	yes	down	GO:0010088(biological_process:phloem development)				ENOG4111ADI(S:Function unknown)	ENOG4111ADI(Mediator complex subunit 28)	sp|Q9SS87|SEOB_ARATH(Protein SIEVE ELEMENT OCCLUSION B OS=Arabidopsis thaliana OX=3702 GN=SEOB PE=1 SV=1)	PF14576(SEO_N:Sieve element occlusion N-terminus)
TRINITY_DN11852_c0_g1	Cluster 2	xyloglucan endotransglucosylase/hydrolase protein 9 [Punica granatum]	0.482619	-1.05104	2.11459e-14	3.18042e-12	yes	down	GO:0042546(biological_process:cell wall biogenesis); GO:0016762(molecular_function:xyloglucan:xyloglucosyl transferase activity); GO:0005618(cellular_component:cell wall); GO:0048046(cellular_component:apoplast); GO:0071555(biological_process:cell wall organization); GO:0006073(biological_process:cellular glucan metabolic process); GO:0004553(molecular_function:hydrolase activity, hydrolyzing O-g…	K08235	E2.4.1.207		ENOG410YBFU(G:Carbohydrate transport and metabolism)	ENOG410YBFU(xyloglucan endotransglucosylase hydrolase protein)	sp|Q8LDW9|XTH9_ARATH(Xyloglucan endotransglucosylase/hydrolase protein 9 OS=Arabidopsis thaliana OX=3702 GN=XTH9 PE=2 SV=2)	PF06955(XET_C:Xyloglucan endo-transglycosylase (XET) C-terminus); PF00722(Glyco_hydro_16:Glycosyl hydrolases family 16)
TRINITY_DN7296_c0_g2	Cluster 2	uncharacterized protein LOC116192867 [Punica granatum]	0.473824	-1.07758	3.5717e-14	5.14127e-12	yes	down	GO:0016787(molecular_function:hydrolase activity)	K07025	K07025		COG1011(S:Function unknown)	COG1011(Hydrolase)	sp|Q09893|YAI5_SCHPO(Uncharacterized protein C24B11.05 OS=Schizosaccharomyces pombe (strain 972 / ATCC 24843) OX=284812 GN=SPAC24B11.05 PE=3 SV=1)	PF13419(HAD_2:Haloacid dehalogenase-like hydrolase); PF13242(Hydrolase_like:HAD-hyrolase-like)
TRINITY_DN8452_c0_g1	Cluster 2	DNA polymerase epsilon subunit 3 [Punica granatum]	0.400218	-1.32114	5.72502e-14	8.14098e-12	yes	down	GO:0005634(cellular_component:nucleus); GO:0046982(molecular_function:protein heterodimerization activity)	K02326	POLE3	map03410(Base excision repair); map03420(Nucleotide excision repair); map03030(DNA replication)	ENOG4111QSW(K:Transcription)	ENOG4111QSW(polymerase (DNA directed), epsilon 3, accessory subunit)
TRINITY_DN2067_c0_g1	Cluster 2	probable leucine-rich repeat receptor-like protein kinase At5g49770 isoform X1 [Punica granatum]	0.479952	-1.05904	6.03763e-14	8.53378e-12	yes	down	GO:0006468(biological_process:protein phosphorylation); GO:0016021(cellular_component:integral component of membrane); GO:0004672(molecular_function:protein kinase activity); GO:0004675(molecular_function:transmembrane receptor protein serine/threonine kinase activity); GO:0005886(cellular_component:plasma membrane); GO:0005524(molecular_function:ATP binding)	K04733	IRAK4		COG0515(T:Signal transduction mechanisms)	COG0515(Serine Threonine protein kinase)	sp|B8BB68|BAK1_ORYSI(LRR receptor kinase BAK1 OS=Oryza sativa subsp. indica OX=39946 GN=BAK1 PE=2 SV=1)	PF07714(PK_Tyr_Ser-Thr:Protein tyrosine and serine/threonine kinase); PF00069(Pkinase:Protein kinase domain)
TRINITY_DN3421_c0_g1	Cluster 2	protein NRT1/ PTR FAMILY 4.5-like [Punica granatum]	0.36124	-1.46897	6.38671e-14	8.97314e-12	yes	down	GO:0016021(cellular_component:integral component of membrane); GO:0016020(cellular_component:membrane); GO:0015333(molecular_function:peptide:proton symporter activity); GO:0022857(molecular_function:transmembrane transporter activity); GO:1904680(molecular_function:peptide transmembrane transporter activity); GO:0035673(molecular_function:oligopeptide transmembrane transporter activity)	K14638	SLC15A3_4, PHT		COG3104(E:Amino acid transport and metabolism)	COG3104(transporter)	sp|Q8H157|PTR19_ARATH(Protein NRT1/ PTR FAMILY 4.6 OS=Arabidopsis thaliana OX=3702 GN=NPF4.6 PE=1 SV=1)	PF00854(PTR2:POT family)
TRINITY_DN28160_c0_g1	Cluster 2	hypothetical protein CRG98_010967 [Punica granatum]	0.404835	-1.30459	1.30225e-13	1.75602e-11	yes	down	GO:0098869(biological_process:cellular oxidant detoxification); GO:0016021(cellular_component:integral component of membrane)				ENOG410ZF0Z(S:Function unknown)	ENOG410ZF0Z(-)
TRINITY_DN5647_c0_g2	Cluster 2	uncharacterized protein LOC116198813 [Punica granatum]	0.379316	-1.39853	1.31224e-13	1.75938e-11	yes	down					ENOG4111DME(S:Function unknown)	ENOG4111DME(-)
TRINITY_DN2595_c0_g2	Cluster 2	scarecrow-like protein 3 [Punica granatum]	0.434219	-1.20351	3.10541e-13	3.75578e-11	yes	down	GO:0003700(molecular_function:transcription factor activity, sequence-specific DNA binding); GO:0043565(molecular_function:sequence-specific DNA binding); GO:0009739(biological_process:response to gibberellin); GO:0005634(cellular_component:nucleus); GO:0006355(biological_process:regulation of transcription, DNA-templated)				ENOG410XRSH(K:Transcription)	ENOG410XRSH(Scarecrow-like protein)	sp|Q9LPR8|SCL3_ARATH(Scarecrow-like protein 3 OS=Arabidopsis thaliana OX=3702 GN=SCL3 PE=1 SV=1)	PF03514(GRAS:GRAS domain family)
TRINITY_DN12023_c0_g1	Cluster 2	hypothetical protein CDL15_Pgr003467 [Punica granatum]	0.445754	-1.16568	7.48143e-13	8.60475e-11	yes	down	GO:0006355(biological_process:regulation of transcription, DNA-templated); GO:0005634(cellular_component:nucleus); GO:0003677(molecular_function:DNA binding)				ENOG410YIMX(S:Function unknown)	ENOG410YIMX(nac domain)	sp|Q9ZVP8|NAC35_ARATH(NAC domain-containing protein 35 OS=Arabidopsis thaliana OX=3702 GN=NAC035 PE=1 SV=2)	PF02365(NAM:No apical meristem (NAM) protein)
TRINITY_DN52_c0_g1	Cluster 2	hypothetical protein CDL15_Pgr016289 [Punica granatum]	0.406552	-1.29849	8.07712e-13	9.15523e-11	yes	down	GO:0008168(molecular_function:methyltransferase activity); GO:0016021(cellular_component:integral component of membrane); GO:0032259(biological_process:methylation); GO:0055085(biological_process:transmembrane transport); GO:0003723(molecular_function:RNA binding)				ENOG410XNZC(S:Function unknown)	ENOG410XNZC(oligo-peptide transporter)	sp|O82485|OPT7_ARATH(Oligopeptide transporter 7 OS=Arabidopsis thaliana OX=3702 GN=OPT7 PE=2 SV=1)	PF03169(OPT:OPT oligopeptide transporter protein)
TRINITY_DN12195_c0_g1	Cluster 2	hypothetical protein CDL15_Pgr013451 [Punica granatum]	0.426283	-1.23012	2.75838e-12	2.9153e-10	yes	down					COG0300(S:Function unknown); COG1028(S:Function unknown)	COG0300(Dehydrogenase); COG1028(Dehydrogenase reductase)		PF00106(adh_short:short chain dehydrogenase); PF13561(adh_short_C2:Enoyl-(Acyl carrier protein) reductase)
TRINITY_DN3471_c0_g1	Cluster 2	CO(2	0.401898	-1.3151	2.82676e-12	2.9609e-10	yes	down	GO:0004252(molecular_function:serine-type endopeptidase activity); GO:0032440(molecular_function:2-alkenal reductase [NAD(P)] activity)				COG1404(V:Defense mechanisms)	COG1404((ABC) transporter)	sp|Q9LNU1|CRSP_ARATH(CO(2)-response secreted protease OS=Arabidopsis thaliana OX=3702 GN=CRSP PE=2 SV=1)	PF00082(Peptidase_S8:Subtilase family); PF05922(Inhibitor_I9:Peptidase inhibitor I9); PF02225(PA:PA domain)
TRINITY_DN6547_c0_g2	Cluster 2	cytokinin riboside 5'-monophosphate phosphoribohydrolase LOG1-like [Punica granatum]	0.363342	-1.4606	2.93948e-12	3.06035e-10	yes	down	GO:0016787(molecular_function:hydrolase activity); GO:0005829(cellular_component:cytosol); GO:0005634(cellular_component:nucleus); GO:0016799(molecular_function:hydrolase activity, hydrolyzing N-glycosyl compounds); GO:0009691(biological_process:cytokinin biosynthetic process)	K22522	LOG		COG1611(S:Function unknown)	COG1611(decarboxylase)	sp|Q8L8B8|LOG3_ARATH(Cytokinin riboside 5'-monophosphate phosphoribohydrolase LOG3 OS=Arabidopsis thaliana OX=3702 GN=LOG3 PE=1 SV=1)	PF03641(Lysine_decarbox:Possible lysine decarboxylase); PF18306(LDcluster4:SLOG cluster4 family)
TRINITY_DN30947_c0_g1	Cluster 2	non-specific lipid-transfer protein 2-like [Punica granatum]	0.450957	-1.14894	3.13387e-12	3.23921e-10	yes	down	GO:0006869(biological_process:lipid transport)				ENOG410YV7D(Q:Secondary metabolites biosynthesis, transport and catabolism); ENOG410Z1B5(Q:Secondary metabolites biosynthesis, transport and catabolism)	ENOG410YV7D(Cytochrome p450); ENOG410Z1B5(Cytochrome p450)	sp|P82353|NLTP2_PRUAR(Non-specific lipid-transfer protein 2 OS=Prunus armeniaca OX=36596 PE=1 SV=1)	PF14368(LTP_2:Probable lipid transfer)
TRINITY_DN14776_c0_g1	Cluster 2	extensin-like [Punica granatum]	0.303438	-1.72053	3.40844e-12	3.49224e-10	yes	down
TRINITY_DN4960_c0_g2	Cluster 2	selenium-binding protein 2 [Punica granatum]	0.351734	-1.50744	6.19626e-12	6.16029e-10	yes	down	GO:0008430(molecular_function:selenium binding)	K17285	SELENBP1	map00920(Sulfur metabolism)	ENOG410XP4F(S:Function unknown)	ENOG410XP4F(selenium-binding protein)	sp|Q93WN0|SEBP2_ARATH(Selenium-binding protein 2 OS=Arabidopsis thaliana OX=3702 GN=SBP2 PE=1 SV=1)	PF05694(SBP56:56kDa selenium binding protein (SBP56))
TRINITY_DN8898_c0_g1	Cluster 2	SNF1-related protein kinase regulatory subunit beta-1 [Punica granatum]	0.39919	-1.32485	6.38525e-12	6.29903e-10	yes	down	GO:0016301(molecular_function:kinase activity)	K07199	PRKAB		ENOG410XRB3(S:Function unknown)	ENOG410XRB3(Protein kinase, AMP-activated, beta)	sp|Q84VQ1|KINB1_ARATH(SNF1-related protein kinase regulatory subunit beta-1 OS=Arabidopsis thaliana OX=3702 GN=KINB1 PE=1 SV=1)	PF04739(AMPKBI:5'-AMP-activated protein kinase beta subunit, interaction domain)
TRINITY_DN3113_c0_g2	Cluster 2	hypothetical protein CDL15_Pgr012605 [Punica granatum]	0.483531	-1.04832	9.50079e-12	9.09865e-10	yes	down	GO:0007165(biological_process:signal transduction); GO:0043531(molecular_function:ADP binding)						sp|Q40253|L6_LINUS(Disease resistance protein L6 OS=Linum usitatissimum OX=4006 GN=L6 PE=1 SV=1)	PF01582(TIR:TIR domain); PF00931(NB-ARC:NB-ARC domain); PF12799(LRR_4:Leucine Rich repeats (2 copies)); PF13676(TIR_2:TIR domain); PF13855(LRR_8:Leucine rich repeat); PF13191(AAA_16:AAA ATPase domain)
TRINITY_DN4659_c0_g2	Cluster 2	uncharacterized protein LOC107420721 [Ziziphus jujuba]	0.423534	-1.23945	1.35201e-11	1.25384e-09	yes	down					ENOG41129UG(S:Function unknown)	ENOG41129UG(Protein of unknown function (DUF674))		PF05056(DUF674:Protein of unknown function (DUF674))
TRINITY_DN23373_c0_g1	Cluster 2	PREDICTED: peroxidase 4-like [Eucalyptus grandis]	0.216072	-2.21041	1.49652e-11	1.37159e-09	yes	down	GO:0020037(molecular_function:heme binding); GO:0006979(biological_process:response to oxidative stress); GO:0005576(cellular_component:extracellular region); GO:0042744(biological_process:hydrogen peroxide catabolic process); GO:0046872(molecular_function:metal ion binding); GO:0004601(molecular_function:peroxidase activity)	K00430	E1.11.1.7	map00940(Phenylpropanoid biosynthesis)	ENOG410YAKJ(G:Carbohydrate transport and metabolism); ENOG410YETZ(G:Carbohydrate transport and metabolism)	ENOG410YAKJ(peroxidase); ENOG410YETZ(peroxidase)	sp|A7NY33|PER4_VITVI(Peroxidase 4 OS=Vitis vinifera OX=29760 GN=GSVIVT00023967001 PE=1 SV=1)	PF00141(peroxidase:Peroxidase)
TRINITY_DN2639_c0_g1	Cluster 2	adenylyl-sulfate kinase 3-like isoform X1 [Punica granatum]	0.405896	-1.30082	1.94463e-11	1.74148e-09	yes	down	GO:0000103(biological_process:sulfate assimilation); GO:0004020(molecular_function:adenylylsulfate kinase activity); GO:0070814(biological_process:hydrogen sulfide biosynthetic process); GO:0005524(molecular_function:ATP binding)	K00860	cysC	map00230(Purine metabolism); map00920(Sulfur metabolism)	COG0529(P:Inorganic ion transport and metabolism)	COG0529(Catalyzes the synthesis of activated sulfate (By similarity))	sp|O49204|KAPS_CATRO(Adenylyl-sulfate kinase, chloroplastic OS=Catharanthus roseus OX=4058 GN=AKN PE=2 SV=1)	PF01583(APS_kinase:Adenylylsulphate kinase)
TRINITY_DN2550_c0_g2	Cluster 2	nucleobase-ascorbate transporter 6-like isoform X1 [Punica granatum]	0.448376	-1.15722	4.71929e-11	3.80511e-09	yes	down	GO:0022857(molecular_function:transmembrane transporter activity); GO:0016021(cellular_component:integral component of membrane); GO:0009506(cellular_component:plasmodesma); GO:0005886(cellular_component:plasma membrane)				COG2233(F:Nucleotide transport and metabolism)	COG2233(permease)	sp|Q0WPE9|NAT7_ARATH(Nucleobase-ascorbate transporter 7 OS=Arabidopsis thaliana OX=3702 GN=NAT7 PE=2 SV=2)	PF00860(Xan_ur_permease:Permease family)
TRINITY_DN497_c0_g1	Cluster 2	hypothetical protein CDL15_Pgr025772 [Punica granatum]	0.398018	-1.32909	5.07168e-11	4.04751e-09	yes	down	GO:0016791(molecular_function:phosphatase activity); GO:0003993(molecular_function:acid phosphatase activity); GO:0052745(molecular_function:inositol phosphate phosphatase activity)	K03103	MINPP1	map00010(Glycolysis / Gluconeogenesis); map00562(Inositol phosphate metabolism)	ENOG4111FS8(S:Function unknown)	ENOG4111FS8(PHOsphatase)	sp|Q8L7E9|MCAC1_ARATH(Protein MID1-COMPLEMENTING ACTIVITY 1 OS=Arabidopsis thaliana OX=3702 GN=MCA1 PE=1 SV=1)	PF00328(His_Phos_2:Histidine phosphatase superfamily (branch 2))
TRINITY_DN9162_c0_g4	Cluster 2	Expansin-A16 [Hibiscus syriacus]	0.191293	-2.38614	5.17467e-11	4.11571e-09	yes	down	GO:0005618(cellular_component:cell wall); GO:0009664(biological_process:plant-type cell wall organization); GO:0016020(cellular_component:membrane); GO:0005576(cellular_component:extracellular region)				ENOG410YEM2(U:Intracellular trafficking, secretion, and vesicular transport); ENOG410YC36(G:Carbohydrate transport and metabolism)	ENOG410YEM2(domain, ankyrin repeat and PH domain); ENOG410YC36(Pollen allergen)	sp|Q38865|EXPA6_ARATH(Expansin-A6 OS=Arabidopsis thaliana OX=3702 GN=EXPA6 PE=2 SV=2)	PF03330(DPBB_1:Lytic transglycolase)
TRINITY_DN9313_c0_g1	Cluster 2	translocase of chloroplast 90, chloroplastic isoform X1 [Punica granatum]	0.382209	-1.38756	7.23436e-11	5.60197e-09	yes	down	GO:0009707(cellular_component:chloroplast outer membrane); GO:0016817(molecular_function:hydrolase activity, acting on acid anhydrides); GO:0045036(biological_process:protein targeting to chloroplast); GO:0005525(molecular_function:GTP binding)							PF11886(TOC159_MAD:Translocase of chloroplast 159/132, membrane anchor domain)
TRINITY_DN2900_c0_g1	Cluster 2	hypothetical protein CRG98_034718 [Punica granatum]	0.470551	-1.08758	8.97792e-11	6.83925e-09	yes	down	GO:0016787(molecular_function:hydrolase activity)				ENOG4111CHI(S:Function unknown)	ENOG4111CHI(IQ calmodulin-binding motif)
TRINITY_DN9826_c0_g1	Cluster 2	early nodulin-like protein 1 [Punica granatum]	0.37367	-1.42016	9.11406e-11	6.92049e-09	yes	down	GO:0046658(cellular_component:anchored component of plasma membrane); GO:0016021(cellular_component:integral component of membrane); GO:0009055(molecular_function:electron carrier activity)				ENOG410YPC9(S:Function unknown)	ENOG410YPC9(Early nodulin-like protein)	sp|Q9SK27|ENL1_ARATH(Early nodulin-like protein 1 OS=Arabidopsis thaliana OX=3702 GN=At2g25060 PE=2 SV=2)	PF02298(Cu_bind_like:Plastocyanin-like domain)
TRINITY_DN5851_c0_g1	Cluster 2	myb family transcription factor PHL11 [Punica granatum]	0.352068	-1.50607	1.2012e-10	8.91892e-09	yes	down	GO:0005634(cellular_component:nucleus); GO:0003677(molecular_function:DNA binding)				ENOG410YGU0(K:Transcription)	ENOG410YGU0(Myb-like DNA-binding domain)	sp|C0SVS4|PHLB_ARATH(Myb family transcription factor PHL11 OS=Arabidopsis thaliana OX=3702 GN=PHL11 PE=1 SV=1)	PF14379(Myb_CC_LHEQLE:MYB-CC type transfactor, LHEQLE motif); PF00249(Myb_DNA-binding:Myb-like DNA-binding domain)
TRINITY_DN11225_c0_g2	Cluster 2	hypothetical protein CRG98_036602 [Punica granatum]	0.344535	-1.53728	1.53385e-10	1.10734e-08	yes	down	GO:0019538(biological_process:protein metabolic process)				COG0542(O:Posttranslational modification, protein turnover, chaperones)	COG0542(ATP-dependent CLP protease ATP-binding subunit)	sp|Q9SVD0|SMXL3_ARATH(Protein SMAX1-LIKE 3 OS=Arabidopsis thaliana OX=3702 GN=SMXL3 PE=2 SV=1)	PF02861(Clp_N:Clp amino terminal domain, pathogenicity island component)
TRINITY_DN12720_c0_g1	Cluster 2	cytochrome oxidase subunit 1, partial [Plantago maxima]	0.331237	-1.59406	2.10077e-10	1.47135e-08	yes	down	GO:0004129(molecular_function:cytochrome-c oxidase activity); GO:0015990(biological_process:electron transport coupled proton transport); GO:0045277(cellular_component:respiratory chain complex IV); GO:0020037(molecular_function:heme binding); GO:0016021(cellular_component:integral component of membrane); GO:0005743(cellular_component:mitochondrial inner membrane); GO:0009060(biological_process:a…	K02256	COX1	map00190(Oxidative phosphorylation)	COG0843(C:Energy production and conversion)	COG0843(Cytochrome C oxidase subunit I)	sp|O99818|COX1_RHISA(Cytochrome c oxidase subunit 1 OS=Rhipicephalus sanguineus OX=34632 GN=COI PE=3 SV=1)	PF00115(COX1:Cytochrome C and Quinol oxidase polypeptide I)
TRINITY_DN5823_c0_g1	Cluster 2	probable rhamnogalacturonate lyase B isoform X2 [Punica granatum]	0.475644	-1.07205	2.36075e-10	1.62435e-08	yes	down	GO:0003824(molecular_function:catalytic activity); GO:0005975(biological_process:carbohydrate metabolic process); GO:0030246(molecular_function:carbohydrate binding)	K18195	RGL4, rhiE		ENOG410YE12(S:Function unknown)	ENOG410YE12(Rhamnogalacturonate lyase)	sp|B0XPA2|RGLB_ASPFC(Probable rhamnogalacturonate lyase B OS=Neosartorya fumigata (strain CEA10 / CBS 144.89 / FGSC A1163) OX=451804 GN=rglB PE=3 SV=1)	PF14683(CBM-like:Polysaccharide lyase family 4, domain III); PF14686(fn3_3:Polysaccharide lyase family 4, domain II); PF06045(Rhamnogal_lyase:Rhamnogalacturonate lyase family)
TRINITY_DN15520_c0_g1	Cluster 2	putative cell wall protein [Punica granatum]	0.194212	-2.3643	2.68758e-10	1.81203e-08	yes	down					ENOG410ZB3I(S:Function unknown)	ENOG410ZB3I(-)	sp|P47925|CWPX_ARATH(Putative cell wall protein OS=Arabidopsis thaliana OX=3702 GN=At2g20870 PE=2 SV=2)
TRINITY_DN29473_c0_g1	Cluster 2	probable 2-oxoglutarate-dependent dioxygenase AOP1 [Punica granatum]	0.303931	-1.71819	3.51887e-10	2.33624e-08	yes	down	GO:0046872(molecular_function:metal ion binding); GO:0051213(molecular_function:dioxygenase activity); GO:0016491(molecular_function:oxidoreductase activity)				COG3491(S:Function unknown)	COG3491(-)	sp|Q9ZTA3|AOP1C_ARATH(Probable 2-oxoglutarate-dependent dioxygenase AOP1 OS=Arabidopsis thaliana OX=3702 GN=AOP1 PE=2 SV=1)	PF03171(2OG-FeII_Oxy:2OG-Fe(II) oxygenase superfamily); PF14226(DIOX_N:non-haem dioxygenase in morphine synthesis N-terminal)
TRINITY_DN5314_c0_g1	Cluster 2		0.353355	-1.50081	4.09351e-10	2.67538e-08	yes	down
TRINITY_DN10865_c0_g3	Cluster 2	uncharacterized protein LOC116187586 [Punica granatum]	0.410618	-1.28413	5.13638e-10	3.24838e-08	yes	down		K08869	ADCK, ABC1		COG0661(S:Function unknown)	COG0661(Required, probably indirectly, for the hydroxylation of 2-octaprenylphenol to 2-octaprenyl-6-hydroxy-phenol, the fourth step in ubiquinone biosynthesis (By similarity))	sp|Q86TW2|ADCK1_HUMAN(AarF domain-containing protein kinase 1 OS=Homo sapiens OX=9606 GN=ADCK1 PE=1 SV=2)	PF00144(Beta-lactamase:Beta-lactamase); PF03109(ABC1:ABC1 family)
TRINITY_DN8333_c0_g1	Cluster 2	transcription factor PIF1 isoform X2 [Prunus dulcis]	0.344694	-1.53661	5.55902e-10	3.48747e-08	yes	down	GO:0046983(molecular_function:protein dimerization activity); GO:0005634(cellular_component:nucleus)						sp|Q8GZM7|PIF1_ARATH(Transcription factor PIF1 OS=Arabidopsis thaliana OX=3702 GN=PIF1 PE=1 SV=1)	PF00010(HLH:Helix-loop-helix DNA-binding domain)
TRINITY_DN18496_c0_g2	Cluster 2	uncharacterized protein LOC116198909 [Punica granatum]	0.260896	-1.93845	9.32014e-10	5.46696e-08	yes	down	GO:0010374(biological_process:stomatal complex development); GO:0016021(cellular_component:integral component of membrane)				ENOG410Z4SM(S:Function unknown)	ENOG410Z4SM(EPIDERMAL PATTERNING FACTOR-like protein)	sp|Q1PEY6|EPFL6_ARATH(EPIDERMAL PATTERNING FACTOR-like protein 6 OS=Arabidopsis thaliana OX=3702 GN=EPFL6 PE=1 SV=1)	PF17181(EPF:Epidermal patterning factor proteins)
TRINITY_DN13056_c0_g2	Cluster 2	hypothetical protein CDL15_Pgr005436 [Punica granatum]	0.0717999	-3.79987	1.3286e-09	7.54791e-08	yes	down	GO:0030628(molecular_function:pre-mRNA 3'-splice site binding); GO:0000386(molecular_function:second spliceosomal transesterification activity); GO:0003924(molecular_function:GTPase activity); GO:0000398(biological_process:mRNA splicing, via spliceosome); GO:0005525(molecular_function:GTP binding)	K12819	SLU7	map03040(Spliceosome)			sp|A2YQU8|SLU7_ORYSI(Pre-mRNA-splicing factor SLU7 OS=Oryza sativa subsp. indica OX=39946 GN=OsI_27673 PE=3 SV=2)	PF11708(Slu7:Pre-mRNA splicing Prp18-interacting factor)
TRINITY_DN16745_c0_g1	Cluster 2	transcription repressor MYB5-like [Punica granatum]	0.389716	-1.3595	1.45875e-09	8.22755e-08	yes	down	GO:0005634(cellular_component:nucleus); GO:0003677(molecular_function:DNA binding)	K09422	MYBP		COG5147(K:Transcription)	COG5147(Myblike DNAbinding domain containing protein)	sp|Q38850|MYB5_ARATH(Transcription repressor MYB5 OS=Arabidopsis thaliana OX=3702 GN=MYB5 PE=1 SV=1)	PF00249(Myb_DNA-binding:Myb-like DNA-binding domain)
TRINITY_DN7688_c1_g1	Cluster 2	hypothetical protein F0562_026732 [Nyssa sinensis]	0.453935	-1.13944	2.1601e-09	1.1705e-07	yes	down	GO:0005737(cellular_component:cytoplasm); GO:0004721(molecular_function:phosphoprotein phosphatase activity); GO:0042539(biological_process:hypotonic salinity response); GO:0005623(cellular_component:cell); GO:0005513(biological_process:detection of calcium ion); GO:0030007(biological_process:cellular potassium ion homeostasis); GO:0005509(molecular_function:calcium ion binding)	K06268	PPP3R, CNB		COG5126(D:Cell cycle control, cell division, chromosome partitioning); COG5126(T:Signal transduction mechanisms); COG5126(Z:Cytoskeleton)	COG5126(Calcium-binding protein); COG5126(Calcium-binding protein); COG5126(Calcium-binding protein)	sp|O81223|CNBL4_ARATH(Calcineurin B-like protein 4 OS=Arabidopsis thaliana OX=3702 GN=CBL4 PE=1 SV=3)	PF00036(EF-hand_1:EF hand); PF13405(EF-hand_6:EF-hand domain); PF13499(EF-hand_7:EF-hand domain pair); PF13202(EF-hand_5:EF hand); PF13833(EF-hand_8:EF-hand domain pair); PF12763(EF-hand_4:Cytoskeletal-regulatory complex EF hand)
TRINITY_DN3945_c0_g1	Cluster 2	uncharacterized protein LOC116193471 isoform X1 [Punica granatum]	0.417469	-1.26026	4.03457e-09	2.06688e-07	yes	down	GO:0016021(cellular_component:integral component of membrane); GO:0016301(molecular_function:kinase activity); GO:0030247(molecular_function:polysaccharide binding)				ENOG410YBHD(S:Function unknown)	ENOG410YBHD(-)		PF13947(GUB_WAK_bind:Wall-associated receptor kinase galacturonan-binding); PF14380(WAK_assoc:Wall-associated receptor kinase C-terminal)
TRINITY_DN11133_c0_g2	Cluster 2	laccase-11 [Punica granatum]	0.471651	-1.08421	4.58905e-09	2.33058e-07	yes	down	GO:0042545(biological_process:cell wall modification); GO:0052716(molecular_function:hydroquinone:oxygen oxidoreductase activity); GO:0004322(molecular_function:ferroxidase activity); GO:0005886(cellular_component:plasma membrane); GO:0030599(molecular_function:pectinesterase activity); GO:0048046(cellular_component:apoplast); GO:0046274(biological_process:lignin catabolic process); GO:0006826(bi…	K05909	E1.10.3.2		COG2132(Q:Secondary metabolites biosynthesis, transport and catabolism)	COG2132(Multicopper oxidase)	sp|Q8VZA1|LAC11_ARATH(Laccase-11 OS=Arabidopsis thaliana OX=3702 GN=LAC11 PE=2 SV=1)	PF07731(Cu-oxidase_2:Multicopper oxidase); PF00394(Cu-oxidase:Multicopper oxidase)
TRINITY_DN18505_c0_g1	Cluster 2	Phospholipase D alpha 4 [Theobroma cacao]	0.250043	-1.99975	4.83647e-09	2.44565e-07	yes	down	GO:0016020(cellular_component:membrane); GO:0016042(biological_process:lipid catabolic process); GO:0070290(molecular_function:N-acylphosphatidylethanolamine-specific phospholipase D activity); GO:0005509(molecular_function:calcium ion binding); GO:0004630(molecular_function:phospholipase D activity); GO:0046470(biological_process:phosphatidylcholine metabolic process)	K01115	PLD1_2	map00565(Ether lipid metabolism); map00564(Glycerophospholipid metabolism); map04144(Endocytosis)	COG1502(O:Posttranslational modification, protein turnover, chaperones)	COG1502(ATP-dependent CLP protease ATP-binding subunit)	sp|Q9C888|PLDA4_ARATH(Phospholipase D alpha 4 OS=Arabidopsis thaliana OX=3702 GN=PLDALPHA4 PE=2 SV=1)	PF12357(PLD_C:Phospholipase D C terminal); PF00614(PLDc:Phospholipase D Active site motif); PF13091(PLDc_2:PLD-like domain); PF00168(C2:C2 domain)
TRINITY_DN11450_c0_g1	Cluster 2	auxin-responsive protein SAUR21-like [Punica granatum]	0.443293	-1.17367	9.19294e-09	4.38595e-07	yes	down	GO:0009733(biological_process:response to auxin)	K14488	SAUR	map04075(Plant hormone signal transduction)	ENOG4111771(S:Function unknown); ENOG410ZATX(S:Function unknown)	ENOG4111771(auxin-induced protein); ENOG410ZATX(auxin-induced protein)	sp|Q9FK62|SAU24_ARATH(Auxin-responsive protein SAUR24 OS=Arabidopsis thaliana OX=3702 GN=SAUR24 PE=2 SV=1)	PF02519(Auxin_inducible:Auxin responsive protein)
TRINITY_DN8160_c0_g1	Cluster 2	remorin-like isoform X2 [Punica granatum]	0.421083	-1.24782	9.32165e-09	4.43639e-07	yes	down					ENOG410Z0US(S:Function unknown)	ENOG410Z0US(Remorin family)		PF03763(Remorin_C:Remorin, C-terminal region)
TRINITY_DN6072_c1_g1	Cluster 2	PREDICTED: endoglucanase 8 [Eucalyptus grandis]	0.470055	-1.0891	1.28962e-08	5.85269e-07	yes	down	GO:0008810(molecular_function:cellulase activity); GO:0030245(biological_process:cellulose catabolic process)	K01179	E3.2.1.4	map00500(Starch and sucrose metabolism)	ENOG410YBFA(G:Carbohydrate transport and metabolism)	ENOG410YBFA(Hydrolase, hydrolyzing O-glycosyl compounds)	sp|Q9CAC1|GUN8_ARATH(Endoglucanase 8 OS=Arabidopsis thaliana OX=3702 GN=CEL1 PE=2 SV=1)	PF00759(Glyco_hydro_9:Glycosyl hydrolase family 9)
TRINITY_DN11774_c0_g1	Cluster 2	uncharacterized protein LOC116215695 [Punica granatum]	0.298537	-1.74402	1.49888e-08	6.71148e-07	yes	down
TRINITY_DN9517_c0_g1	Cluster 2	myb family transcription factor PHL11 [Punica granatum]	0.192673	-2.37577	1.57472e-08	6.98442e-07	yes	down	GO:0005634(cellular_component:nucleus); GO:0003677(molecular_function:DNA binding)				ENOG410YGU0(K:Transcription)	ENOG410YGU0(Myb-like DNA-binding domain)	sp|C0SVS4|PHLB_ARATH(Myb family transcription factor PHL11 OS=Arabidopsis thaliana OX=3702 GN=PHL11 PE=1 SV=1)	PF14379(Myb_CC_LHEQLE:MYB-CC type transfactor, LHEQLE motif)
TRINITY_DN23763_c0_g1	Cluster 2	uncharacterized protein At1g08160-like [Punica granatum]	0.423729	-1.23879	1.74604e-08	7.65744e-07	yes	down	GO:0016021(cellular_component:integral component of membrane)				ENOG410YPRU(S:Function unknown)	ENOG410YPRU(harpin-induced protein-related HIN1-related harpin-responsive protein-related)	sp|Q9SJ52|NHL10_ARATH(NDR1/HIN1-like protein 10 OS=Arabidopsis thaliana OX=3702 GN=NHL10 PE=2 SV=1)
TRINITY_DN5837_c0_g1	Cluster 2	hypothetical protein CDL15_Pgr025327 [Punica granatum]	0.411335	-1.28162	3.63376e-08	1.46745e-06	yes	down					ENOG4111TEK(S:Function unknown)	ENOG4111TEK(Domain of unknown function (DUF702))	sp|Q94CK9|LRP1_ARATH(Protein LATERAL ROOT PRIMORDIUM 1 OS=Arabidopsis thaliana OX=3702 GN=LRP1 PE=1 SV=1)	PF05142(DUF702:Domain of unknown function (DUF702))
TRINITY_DN30779_c0_g1	Cluster 2	hypothetical protein CDL15_Pgr018240 [Punica granatum]	0.418601	-1.25635	5.21391e-08	2.00877e-06	yes	down					ENOG4111A0D(S:Function unknown)	ENOG4111A0D(-)
TRINITY_DN9147_c0_g1	Cluster 2	pectin acetylesterase 10-like [Punica granatum]	0.425153	-1.23395	5.698e-08	2.17386e-06	yes	down	GO:0005618(cellular_component:cell wall); GO:0016787(molecular_function:hydrolase activity); GO:0005576(cellular_component:extracellular region); GO:0071555(biological_process:cell wall organization)	K19882	NOTUM		ENOG410XQKD(S:Function unknown)	ENOG410XQKD(pectinacetylesterase)	sp|Q9SFF6|PAE12_ARATH(Pectin acetylesterase 12 OS=Arabidopsis thaliana OX=3702 GN=PAE12 PE=2 SV=1)	PF03283(PAE:Pectinacetylesterase)
TRINITY_DN1173_c0_g1	Cluster 2	hypothetical protein CRG98_019667 [Punica granatum]	0.466159	-1.10111	6.63753e-08	2.49578e-06	yes	down	GO:0016021(cellular_component:integral component of membrane); GO:0004601(molecular_function:peroxidase activity); GO:0020037(molecular_function:heme binding); GO:0006979(biological_process:response to oxidative stress)	K00434	E1.11.1.11	map00480(Glutathione metabolism); map00053(Ascorbate and aldarate metabolism)	COG0376(P:Inorganic ion transport and metabolism)	COG0376(Bifunctional enzyme with both catalase and broad- spectrum peroxidase activity (By similarity))	sp|Q0JEQ2|APX3_ORYSJ(Probable L-ascorbate peroxidase 3, peroxisomal OS=Oryza sativa subsp. japonica OX=39947 GN=APX3 PE=2 SV=1)	PF00141(peroxidase:Peroxidase)
TRINITY_DN12591_c0_g2	Cluster 2		0.385694	-1.37447	8.01357e-08	2.94245e-06	yes	down
TRINITY_DN13735_c0_g1	Cluster 2	uncharacterized protein LOC116198952 isoform X2 [Punica granatum]	0.276655	-1.85384	9.23688e-08	3.33937e-06	yes	down	GO:0016021(cellular_component:integral component of membrane); GO:0005975(biological_process:carbohydrate metabolic process); GO:0004553(molecular_function:hydrolase activity, hydrolyzing O-glycosyl compounds)				ENOG4111KKZ(S:Function unknown)	ENOG4111KKZ(-)
TRINITY_DN1198_c0_g1	Cluster 2	hypothetical protein CDL15_Pgr001489 [Punica granatum]	0.44147	-1.17961	9.339e-08	3.37109e-06	yes	down	GO:0003700(molecular_function:transcription factor activity, sequence-specific DNA binding)				ENOG410YEVN(K:Transcription)	ENOG410YEVN(Transcription factor)	sp|F4IN23|BZP34_ARATH(Basic leucine zipper 34 OS=Arabidopsis thaliana OX=3702 GN=BZIP34 PE=1 SV=1)
TRINITY_DN9428_c0_g1	Cluster 2		0.374569	-1.4167	9.93958e-08	3.56594e-06	yes	down
TRINITY_DN6137_c1_g1	Cluster 2	heavy metal-associated isoprenylated plant protein 30-like [Punica granatum]	0.178732	-2.48413	1.00373e-07	3.59e-06	yes	down	GO:0046872(molecular_function:metal ion binding); GO:0030001(biological_process:metal ion transport)				COG2608(S:Function unknown)	COG2608(heavy metal transport detoxification protein)	sp|Q8LDS4|NAKR1_ARATH(Protein SODIUM POTASSIUM ROOT DEFECTIVE 1 OS=Arabidopsis thaliana OX=3702 GN=NAKR1 PE=1 SV=1)	PF00403(HMA:Heavy-metal-associated domain)
TRINITY_DN29634_c0_g1	Cluster 2	auxin-induced protein 6B-like [Punica granatum]	0.498574	-1.00412	1.06802e-07	3.78532e-06	yes	down	GO:0009733(biological_process:response to auxin)	K14488	SAUR	map04075(Plant hormone signal transduction)	ENOG410ZNE5(S:Function unknown)	ENOG410ZNE5(SAUR family)	sp|Q9ZUZ3|SAU32_ARATH(Auxin-responsive protein SAUR32 OS=Arabidopsis thaliana OX=3702 GN=SAUR32 PE=2 SV=1)	PF02519(Auxin_inducible:Auxin responsive protein)
TRINITY_DN10399_c0_g1	Cluster 2	aspartic proteinase oryzasin-1-like [Punica granatum]	0.284547	-1.81326	1.2218e-07	4.26593e-06	yes	down	GO:0006508(biological_process:proteolysis); GO:0004190(molecular_function:aspartic-type endopeptidase activity); GO:0006629(biological_process:lipid metabolic process); GO:0030163(biological_process:protein catabolic process)	K08245	E3.4.23.40		ENOG410XNV7(O:Posttranslational modification, protein turnover, chaperones)	ENOG410XNV7(aspartic)	sp|O65390|APA1_ARATH(Aspartic proteinase A1 OS=Arabidopsis thaliana OX=3702 GN=APA1 PE=1 SV=1)	PF00026(Asp:Eukaryotic aspartyl protease); PF14543(TAXi_N:Xylanase inhibitor N-terminal); PF03489(SapB_2:Saposin-like type B, region 2); PF05184(SapB_1:Saposin-like type B, region 1)
TRINITY_DN9121_c1_g1	Cluster 2	dof zinc finger protein DOF5.6 [Punica granatum]	0.380061	-1.3957	1.68741e-07	5.68031e-06	yes	down	GO:0006355(biological_process:regulation of transcription, DNA-templated); GO:0005634(cellular_component:nucleus); GO:0003677(molecular_function:DNA binding)				ENOG410YEQW(S:Function unknown)	ENOG410YEQW(Zinc finger protein)	sp|Q9FM03|DOF56_ARATH(Dof zinc finger protein DOF5.6 OS=Arabidopsis thaliana OX=3702 GN=DOF5.6 PE=2 SV=2)	PF02701(zf-Dof:Dof domain, zinc finger)
TRINITY_DN12023_c0_g3	Cluster 2	hypothetical protein CDL15_Pgr003467 [Punica granatum]	0.42643	-1.22962	1.81639e-07	6.07093e-06	yes	down	GO:0006355(biological_process:regulation of transcription, DNA-templated); GO:0005634(cellular_component:nucleus); GO:0003677(molecular_function:DNA binding)				ENOG410YIMX(S:Function unknown)	ENOG410YIMX(nac domain)	sp|Q9ZVP8|NAC35_ARATH(NAC domain-containing protein 35 OS=Arabidopsis thaliana OX=3702 GN=NAC035 PE=1 SV=2)	PF02365(NAM:No apical meristem (NAM) protein)
TRINITY_DN8995_c0_g1	Cluster 2	chaperone protein ClpB3, chloroplastic [Punica granatum]	0.372819	-1.42345	1.9878e-07	6.58752e-06	yes	down	GO:0005737(cellular_component:cytoplasm); GO:0019538(biological_process:protein metabolic process); GO:0042026(biological_process:protein refolding); GO:0009408(biological_process:response to heat); GO:0005524(molecular_function:ATP binding); GO:0009507(cellular_component:chloroplast)	K03695	clpB		COG0542(O:Posttranslational modification, protein turnover, chaperones)	COG0542(peptidyl-prolyl cis-trans isomerase)	sp|Q9LF37|CLPB3_ARATH(Chaperone protein ClpB3, chloroplastic OS=Arabidopsis thaliana OX=3702 GN=CLPB3 PE=1 SV=1)	PF07724(AAA_2:AAA domain (Cdc48 subfamily)); PF17871(AAA_lid_9:AAA lid domain); PF02861(Clp_N:Clp amino terminal domain, pathogenicity island component); PF10431(ClpB_D2-small:C-terminal, D2-small domain, of ClpB protein); PF00004(AAA:ATPase family associated with various cellular activities (AAA)); PF07728(AAA_5:AAA domain (dynein-related subfamily)); PF00158(Sigma54_activat:Sigma-54 interaction…
TRINITY_DN11343_c0_g1	Cluster 2	hypothetical protein CDL15_Pgr003177 [Punica granatum]	0.456319	-1.13189	2.17082e-07	7.11368e-06	yes	down							sp|Q9FPT1|UBP12_ARATH(Ubiquitin carboxyl-terminal hydrolase 12 OS=Arabidopsis thaliana OX=3702 GN=UBP12 PE=1 SV=2)	PF00917(MATH:MATH domain)
TRINITY_DN7499_c0_g2	Cluster 2	trans-resveratrol di-O-methyltransferase-like isoform X1 [Punica granatum]	0.359369	-1.47646	2.21173e-07	7.22756e-06	yes	down	GO:0008757(molecular_function:S-adenosylmethionine-dependent methyltransferase activity); GO:0046983(molecular_function:protein dimerization activity); GO:0008171(molecular_function:O-methyltransferase activity); GO:0032259(biological_process:methylation); GO:0019438(biological_process:aromatic compound biosynthetic process)	K16040	ROMT	map00945(Stilbenoid, diarylheptanoid and gingerol biosynthesis)	ENOG410XS7T(S:Function unknown)	ENOG410XS7T(o-methyltransferase)	sp|B0ZB57|OMT3_HUMLU(Probable O-methyltransferase 3 OS=Humulus lupulus OX=3486 GN=OMT3 PE=2 SV=1)	PF00891(Methyltransf_2:O-methyltransferase domain); PF08100(Dimerisation:Dimerisation domain)
TRINITY_DN1154_c0_g2	Cluster 2	hypothetical protein CDL15_Pgr027094 [Punica granatum]	0.482954	-1.05004	2.51542e-07	8.08483e-06	yes	down	GO:0016788(molecular_function:hydrolase activity, acting on ester bonds)						sp|Q9FK75|GDL82_ARATH(GDSL esterase/lipase At5g45670 OS=Arabidopsis thaliana OX=3702 GN=At5g45670 PE=2 SV=1)	PF00657(Lipase_GDSL:GDSL-like Lipase/Acylhydrolase)
TRINITY_DN4658_c0_g1	Cluster 2	exocyst complex component EXO70A1 [Punica granatum]	0.455479	-1.13454	2.78362e-07	8.76672e-06	yes	down	GO:0015031(biological_process:protein transport); GO:0016021(cellular_component:integral component of membrane); GO:0006887(biological_process:exocytosis); GO:0000145(cellular_component:exocyst)	K07195	EXOC7, EXO70		ENOG410YIGI(S:Function unknown)	ENOG410YIGI(exocyst complex)	sp|Q9LZD3|E70A1_ARATH(Exocyst complex component EXO70A1 OS=Arabidopsis thaliana OX=3702 GN=EXO70A1 PE=1 SV=1)	PF03081(Exo70:Exo70 exocyst complex subunit)
TRINITY_DN6014_c0_g1	Cluster 2	aspartyl protease family protein 1 [Punica granatum]	0.467125	-1.09812	2.90697e-07	9.14293e-06	yes	down	GO:0006508(biological_process:proteolysis); GO:0016021(cellular_component:integral component of membrane); GO:0004190(molecular_function:aspartic-type endopeptidase activity); GO:0030163(biological_process:protein catabolic process)				ENOG410XNV7(O:Posttranslational modification, protein turnover, chaperones)	ENOG410XNV7(aspartic)	sp|Q8VYV9|APF1_ARATH(Aspartyl protease family protein 1 OS=Arabidopsis thaliana OX=3702 GN=APF1 PE=2 SV=1)	PF14543(TAXi_N:Xylanase inhibitor N-terminal)
TRINITY_DN5954_c0_g1	Cluster 2	uncharacterized protein LOC116197047 [Punica granatum]	0.486109	-1.04065	3.81245e-07	1.16625e-05	yes	down					ENOG410YR2X(S:Function unknown)	ENOG410YR2X(BTB POZ domain-containing protein)
TRINITY_DN22095_c0_g1	Cluster 2	kinesin-like protein KIN-14F [Punica granatum]	0.488273	-1.03424	5.98331e-07	1.75045e-05	yes	down	GO:0008017(molecular_function:microtubule binding); GO:0007018(biological_process:microtubule-based movement); GO:0003777(molecular_function:microtubule motor activity); GO:0005524(molecular_function:ATP binding)	K10406	KIFC2_3		COG5059(L:Replication, recombination and repair)	COG5059(Retrotransposon protein)	sp|Q8W1Y3|KN14F_ARATH(Kinesin-like protein KIN-14F OS=Arabidopsis thaliana OX=3702 GN=KIN14F PE=1 SV=2)	PF16796(Microtub_bd:Microtubule binding); PF00225(Kinesin:Kinesin motor domain); PF00307(CH:Calponin homology (CH) domain)
TRINITY_DN6009_c0_g1	Cluster 2	zinc finger protein WIP2-like [Punica granatum]	0.466366	-1.10047	7.14447e-07	2.06696e-05	yes	down	GO:0005634(cellular_component:nucleus); GO:0048856(biological_process:anatomical structure development); GO:0010468(biological_process:regulation of gene expression); GO:0003676(molecular_function:nucleic acid binding); GO:0003677(molecular_function:DNA binding)				COG5048(S:Function unknown)	COG5048(Zinc finger protein)	sp|Q9SVY1|ZWIP2_ARATH(Zinc finger protein WIP2 OS=Arabidopsis thaliana OX=3702 GN=WIP2 PE=1 SV=1)	PF00096(zf-C2H2:Zinc finger, C2H2 type)
TRINITY_DN6946_c0_g2	Cluster 2	probable E3 ubiquitin-protein ligase MARCH10 isoform X1 [Punica granatum]	0.384351	-1.37951	8.08664e-07	2.30376e-05	yes	down	GO:0016021(cellular_component:integral component of membrane); GO:0008270(molecular_function:zinc ion binding)				COG5183(O:Posttranslational modification, protein turnover, chaperones)	COG5183((Membrane-Associated Ring finger (C3HC4)))		PF12906(RINGv:RING-variant domain)
TRINITY_DN1332_c0_g1	Cluster 2	Glycosyl transferase [Macleaya cordata]	0.393349	-1.34612	9.54361e-07	2.63748e-05	yes	down	GO:0016740(molecular_function:transferase activity); GO:0016021(cellular_component:integral component of membrane)	K00729	ALG5	map00510(N-Glycan biosynthesis)	COG0463(M:Cell wall/membrane/envelope biogenesis)	COG0463(Glycosyl transferase, family 2)	sp|A2DZE8|ALG5A_TRIVA(Dolichyl-phosphate beta-glucosyltransferase ALG5A OS=Trichomonas vaginalis OX=5722 GN=ALG5A PE=1 SV=1)
TRINITY_DN8753_c0_g1	Cluster 2	NADH--cytochrome b5 reductase 1-like isoform X1 [Punica granatum]	0.447733	-1.15929	1.00925e-06	2.76387e-05	yes	down	GO:0004128(molecular_function:cytochrome-b5 reductase activity, acting on NAD(P)H); GO:0016021(cellular_component:integral component of membrane); GO:0016491(molecular_function:oxidoreductase activity)	K00326	E1.6.2.2	map00520(Amino sugar and nucleotide sugar metabolism)	COG0543(C:Energy production and conversion)	COG0543(cytochrome-b5 reductase activity, acting on NAD(P)H)	sp|Q9ZNT1|NB5R1_ARATH(NADH--cytochrome b5 reductase 1 OS=Arabidopsis thaliana OX=3702 GN=CBR1 PE=1 SV=1)	PF00970(FAD_binding_6:Oxidoreductase FAD-binding domain); PF00175(NAD_binding_1:Oxidoreductase NAD-binding domain)
TRINITY_DN2314_c0_g1	Cluster 2	tryptophan--tRNA ligase, cytoplasmic [Syzygium oleosum]	0.249415	-2.00338	1.02859e-06	2.80626e-05	yes	down	GO:0006436(biological_process:tryptophanyl-tRNA aminoacylation); GO:0005737(cellular_component:cytoplasm); GO:0004830(molecular_function:tryptophan-tRNA ligase activity); GO:0005524(molecular_function:ATP binding)	K01867	WARS, trpS	map00970(Aminoacyl-tRNA biosynthesis)	COG0180(J:Translation, ribosomal structure and biogenesis)	COG0180(tryptophanyltRNA synthetase)	sp|Q9SR15|SYWC_ARATH(Tryptophan--tRNA ligase, cytoplasmic OS=Arabidopsis thaliana OX=3702 GN=At3g04600 PE=2 SV=1)
TRINITY_DN18888_c0_g2	Cluster 2		0.338468	-1.56291	1.22562e-06	3.29779e-05	yes	down
TRINITY_DN4505_c0_g1	Cluster 2		0.457208	-1.12908	1.56116e-06	4.06542e-05	yes	down
TRINITY_DN7181_c0_g1	Cluster 2	uncharacterized protein LOC116212403 [Punica granatum]	0.429923	-1.21785	1.58115e-06	4.08574e-05	yes	down					ENOG4111S54(S:Function unknown)	ENOG4111S54(carboxyl-terminal peptidase)		PF14365(Neprosin_AP:Neprosin activation peptide); PF03080(Neprosin:Neprosin)
TRINITY_DN7701_c0_g1	Cluster 2	uncharacterized protein LOC116201379 isoform X1 [Punica granatum]	0.498194	-1.00522	1.64443e-06	4.23526e-05	yes	down					ENOG410XUP5(S:Function unknown)	ENOG410XUP5(expressed protein)		PF14389(Lzipper-MIP1:Leucine-zipper of ternary complex factor MIP1); PF04784(DUF547:Protein of unknown function, DUF547)
TRINITY_DN10640_c0_g3	Cluster 2	NAC domain-containing protein 75 isoform X3 [Punica granatum]	0.328401	-1.60647	1.64821e-06	4.24034e-05	yes	down	GO:0006355(biological_process:regulation of transcription, DNA-templated); GO:0005634(cellular_component:nucleus); GO:0044212(molecular_function:transcription regulatory region DNA binding); GO:0003677(molecular_function:DNA binding)				ENOG410YHV1(S:Function unknown)	ENOG410YHV1(nac domain)	sp|Q9M0F8|NAC75_ARATH(NAC domain-containing protein 75 OS=Arabidopsis thaliana OX=3702 GN=NAC075 PE=2 SV=1)	PF02365(NAM:No apical meristem (NAM) protein)
TRINITY_DN10196_c0_g4	Cluster 2		0.26603	-1.91034	1.70279e-06	4.35213e-05	yes	down
TRINITY_DN4193_c1_g2	Cluster 2	TMV resistance protein N-like [Punica granatum]	0.185739	-2.42865	1.75723e-06	4.48151e-05	yes	down	GO:0007165(biological_process:signal transduction); GO:0043531(molecular_function:ADP binding)				COG4886(S:Function unknown)	COG4886(leucine Rich Repeat)	sp|V9M398|RUN1_VITRO(Disease resistance protein RUN1 OS=Vitis rotundifolia OX=103349 GN=RUN1 PE=1 SV=1)	PF01582(TIR:TIR domain); PF00931(NB-ARC:NB-ARC domain); PF13676(TIR_2:TIR domain); PF13401(AAA_22:AAA domain); PF13191(AAA_16:AAA ATPase domain); PF03215(Rad17:Rad17 P-loop domain)
TRINITY_DN3301_c0_g4	Cluster 2	hypothetical protein CRG98_027698 [Punica granatum]	0.470559	-1.08755	2.06996e-06	5.16127e-05	yes	down	GO:0010087(biological_process:phloem or xylem histogenesis); GO:0010305(biological_process:leaf vascular tissue pattern formation); GO:0009734(biological_process:auxin-activated signaling pathway)				ENOG4110M78(S:Function unknown)	ENOG4110M78(Plant pleckstrin homology-like region)	sp|Q8W4K5|VAB_ARATH(VAN3-binding protein OS=Arabidopsis thaliana OX=3702 GN=VAB PE=1 SV=1)	PF08458(PH_2:Plant pleckstrin homology-like region)
TRINITY_DN6725_c0_g1	Cluster 2	probable serine/threonine-protein kinase PBL8 isoform X2 [Punica granatum]	0.482209	-1.05227	2.29519e-06	5.6746e-05	yes	down	GO:0004674(molecular_function:protein serine/threonine kinase activity); GO:0016021(cellular_component:integral component of membrane); GO:0005524(molecular_function:ATP binding); GO:0004672(molecular_function:protein kinase activity)				COG0515(T:Signal transduction mechanisms)	COG0515(Serine Threonine protein kinase)	sp|Q8GXZ3|PBL8_ARATH(Probable serine/threonine-protein kinase PBL8 OS=Arabidopsis thaliana OX=3702 GN=PBL8 PE=1 SV=1)
TRINITY_DN11737_c0_g1	Cluster 2	linoleate 9S-lipoxygenase 6-like [Punica granatum]	0.404807	-1.3047	2.3302e-06	5.75511e-05	yes	down	GO:0031408(biological_process:oxylipin biosynthetic process); GO:0046872(molecular_function:metal ion binding); GO:0016702(molecular_function:oxidoreductase activity, acting on single donors with incorporation of molecular oxygen, incorporation of two atoms of oxygen)	K00454	LOX2S	map00591(Linoleic acid metabolism); map00592(alpha-Linolenic acid metabolism)	ENOG410YATF(P:Inorganic ion transport and metabolism)	ENOG410YATF(Plant lipoxygenase may be involved in a number of diverse aspects of plant physiology including growth and development, pest resistance, and senescence or responses to wounding (By similarity))	sp|Q43191|LOX15_SOLTU(Probable linoleate 9S-lipoxygenase 5 OS=Solanum tuberosum OX=4113 GN=LOX1.5 PE=2 SV=1)	PF00305(Lipoxygenase:Lipoxygenase); PF01477(PLAT:PLAT/LH2 domain)
TRINITY_DN9383_c0_g2	Cluster 2	uncharacterized protein LOC116213874 [Punica granatum]	0.410172	-1.2857	2.46515e-06	6.02872e-05	yes	down	GO:0050661(molecular_function:NADP binding); GO:0005975(biological_process:carbohydrate metabolic process); GO:0051287(molecular_function:NAD binding); GO:0016832(molecular_function:aldehyde-lyase activity); GO:0008270(molecular_function:zinc ion binding); GO:0016491(molecular_function:oxidoreductase activity)				COG3395(S:Function unknown)	COG3395(type III effector, Hrp-dependent)	sp|Q0KBC7|LTND_CUPNH(L-threonate dehydrogenase OS=Cupriavidus necator (strain ATCC 17699 / H16 / DSM 428 / Stanier 337) OX=381666 GN=ltnD PE=1 SV=1)	PF14833(NAD_binding_11:NAD-binding of NADP-dependent 3-hydroxyisobutyrate dehydrogenase); PF03446(NAD_binding_2:NAD binding domain of 6-phosphogluconate dehydrogenase); PF07005(SBD_N:Sugar-binding N-terminal domain)
TRINITY_DN9532_c0_g1	Cluster 2	hypothetical protein CDL15_Pgr002848 [Punica granatum]	0.367258	-1.44513	2.46668e-06	6.02872e-05	yes	down	GO:0006355(biological_process:regulation of transcription, DNA-templated); GO:0005634(cellular_component:nucleus); GO:0044212(molecular_function:transcription regulatory region DNA binding); GO:0003677(molecular_function:DNA binding)				ENOG410YF7Q(S:Function unknown)	ENOG410YF7Q(NAC domain-containing protein 8-like)	sp|O49459|NAC73_ARATH(NAC domain-containing protein 73 OS=Arabidopsis thaliana OX=3702 GN=NAC073 PE=2 SV=1)	PF02365(NAM:No apical meristem (NAM) protein)
TRINITY_DN11508_c0_g1	Cluster 2	AT-hook motif nuclear-localized protein 15 [Punica granatum]	0.29708	-1.75108	2.48232e-06	6.06064e-05	yes	down	GO:0003700(molecular_function:transcription factor activity, sequence-specific DNA binding); GO:0003680(molecular_function:AT DNA binding); GO:0005634(cellular_component:nucleus)				ENOG410YBAD(S:Function unknown)	ENOG410YBAD(AT-hook protein of GA feedback 2)	sp|Q8GWQ2|AHL20_ARATH(AT-hook motif nuclear-localized protein 20 OS=Arabidopsis thaliana OX=3702 GN=AHL20 PE=2 SV=1)	PF03479(PCC:Plants and Prokaryotes Conserved (PCC) domain)
TRINITY_DN12008_c0_g2	Cluster 2	3-isopropylmalate dehydratase large subunit, chloroplastic [Punica granatum]	0.12673	-2.98017	2.5424e-06	6.16646e-05	yes	down	GO:0003861(molecular_function:3-isopropylmalate dehydratase activity); GO:0008652(biological_process:cellular amino acid biosynthetic process); GO:0051539(molecular_function:4 iron, 4 sulfur cluster binding)	K01703	leuC, IPMI-L	map00660(C5-Branched dibasic acid metabolism); map00966(Glucosinolate biosynthesis); map00290(Valine, leucine and isoleucine biosynthesis)	COG0065(E:Amino acid transport and metabolism)	COG0065(Catalyzes the isomerization between 2-isopropylmalate and 3-isopropylmalate, via the formation of 2-isopropylmaleate (By similarity))	sp|Q94AR8|LEUC_ARATH(3-isopropylmalate dehydratase large subunit, chloroplastic OS=Arabidopsis thaliana OX=3702 GN=IIL1 PE=1 SV=1)
TRINITY_DN10322_c0_g1	Cluster 2	zinc finger protein CONSTANS-like [Punica granatum]	0.265686	-1.9122	2.63005e-06	6.35519e-05	yes	down	GO:0005634(cellular_component:nucleus); GO:0008270(molecular_function:zinc ion binding); GO:0009909(biological_process:regulation of flower development)				COG5641(S:Function unknown)	COG5641(-)	sp|Q9FHH8|COL5_ARATH(Zinc finger protein CONSTANS-LIKE 5 OS=Arabidopsis thaliana OX=3702 GN=COL5 PE=2 SV=2)	PF06203(CCT:CCT motif); PF00643(zf-B_box:B-box zinc finger)
TRINITY_DN12419_c0_g3	Cluster 2	dynamin-related protein 5A-like [Punica granatum]	0.155596	-2.68412	2.94835e-06	7.05888e-05	yes	down	GO:0003924(molecular_function:GTPase activity); GO:0005525(molecular_function:GTP binding)				COG0699(S:Function unknown)	COG0699(Dynamin family)	sp|Q39828|SDL5A_SOYBN(Dynamin-related protein 5A OS=Glycine max OX=3847 PE=2 SV=1)	PF01031(Dynamin_M:Dynamin central region); PF02212(GED:Dynamin GTPase effector domain)
TRINITY_DN10380_c0_g1	Cluster 2	uncharacterized protein LOC116215525 [Punica granatum]	0.375371	-1.41361	3.08306e-06	7.28284e-05	yes	down	GO:0016021(cellular_component:integral component of membrane); GO:0005840(cellular_component:ribosome)				ENOG410YFFW(S:Function unknown)	ENOG410YFFW(Protein of unknown function (DUF1666))		PF07891(DUF1666:Protein of unknown function (DUF1666))
TRINITY_DN11225_c1_g4	Cluster 2	hypothetical protein CRG98_036602 [Punica granatum]	0.371708	-1.42776	3.10888e-06	7.33103e-05	yes	down	GO:0019538(biological_process:protein metabolic process)				COG0542(O:Posttranslational modification, protein turnover, chaperones)	COG0542(ATP-dependent CLP protease ATP-binding subunit)	sp|Q9SVD0|SMXL3_ARATH(Protein SMAX1-LIKE 3 OS=Arabidopsis thaliana OX=3702 GN=SMXL3 PE=2 SV=1)
TRINITY_DN12362_c0_g1	Cluster 2	hypothetical protein CDL15_Pgr021284 [Punica granatum]	0.334634	-1.57934	3.57698e-06	8.33432e-05	yes	down		K10268	FBXL2_20		ENOG410XQ54(S:Function unknown)	ENOG410XQ54(hydroxyproline-rich glycoprotein)
TRINITY_DN14184_c2_g1	Cluster 2		0.447843	-1.15894	3.63207e-06	8.43756e-05	yes	down
TRINITY_DN10662_c0_g1	Cluster 2	hypothetical protein CRG98_022630 [Punica granatum]	0.455664	-1.13396	3.84496e-06	8.84454e-05	yes	down	GO:0016021(cellular_component:integral component of membrane)				ENOG410YDAC(S:Function unknown)	ENOG410YDAC(Noncatalytic subunit)	sp|P92990|PGL3_ARATH(Polygalacturonase 1 beta-like protein 3 OS=Arabidopsis thaliana OX=3702 GN=PGL3 PE=2 SV=2)	PF03181(BURP:BURP domain)
TRINITY_DN10299_c0_g1	Cluster 2	heavy metal-associated isoprenylated plant protein 2-like isoform X1 [Punica granatum]	0.0774232	-3.69109	4.11701e-06	9.37839e-05	yes	down	GO:0016301(molecular_function:kinase activity); GO:0046872(molecular_function:metal ion binding); GO:0030001(biological_process:metal ion transport); GO:0035299(molecular_function:inositol pentakisphosphate 2-kinase activity); GO:0005524(molecular_function:ATP binding)	K10572	IPPK	map04070(Phosphatidylinositol signaling system); map00562(Inositol phosphate metabolism)	ENOG410Z8DI(S:Function unknown)	ENOG410Z8DI(Heavy-metal-associated domain)	sp|Q9SFF7|HIP43_ARATH(Heavy metal-associated isoprenylated plant protein 43 OS=Arabidopsis thaliana OX=3702 GN=HIPP43 PE=2 SV=1)	PF00403(HMA:Heavy-metal-associated domain)
TRINITY_DN8809_c1_g1	Cluster 2	uncharacterized protein LOC116212662 [Punica granatum]	0.383323	-1.38337	5.08718e-06	0.000112181	yes	down					ENOG4111960(S:Function unknown)	ENOG4111960(-)
TRINITY_DN2939_c0_g1	Cluster 2	glyceraldehyde-3-phosphate dehydrogenase GAPCP2, chloroplastic [Punica granatum]	0.377986	-1.4036	5.72561e-06	0.000123361	yes	down	GO:0050661(molecular_function:NADP binding); GO:0051287(molecular_function:NAD binding); GO:0005829(cellular_component:cytosol); GO:0016620(molecular_function:oxidoreductase activity, acting on the aldehyde or oxo group of donors, NAD or NADP as acceptor); GO:0004365(molecular_function:glyceraldehyde-3-phosphate dehydrogenase (NAD+) (phosphorylating) activity); GO:0006006(biological_process:gluco…	K00134	GAPDH, gapA	map00010(Glycolysis / Gluconeogenesis); map00710(Carbon fixation in photosynthetic organisms)	COG0057(G:Carbohydrate transport and metabolism)	COG0057(glyceraldehyde3phosphate dehydrogenase)	sp|Q5E924|G3PP2_ARATH(Glyceraldehyde-3-phosphate dehydrogenase GAPCP2, chloroplastic OS=Arabidopsis thaliana OX=3702 GN=GAPCP2 PE=2 SV=1)	PF02800(Gp_dh_C:Glyceraldehyde 3-phosphate dehydrogenase, C-terminal domain); PF00044(Gp_dh_N:Glyceraldehyde 3-phosphate dehydrogenase, NAD binding domain)
TRINITY_DN103_c0_g1	Cluster 2	uncharacterized protein LOC116206795 [Punica granatum]	0.213371	-2.22857	6.05595e-06	0.000129291	yes	down	GO:0016021(cellular_component:integral component of membrane)							PF05553(DUF761:Cotton fibre expressed protein)
TRINITY_DN8754_c0_g1	Cluster 2		0.164695	-2.60213	9.09681e-06	0.000184635	yes	down
TRINITY_DN24109_c0_g2	Cluster 2	calcium-binding protein KIC-like [Punica granatum]	0.164725	-2.60187	1.07838e-05	0.000211911	yes	down	GO:0005509(molecular_function:calcium ion binding)	K16465	CETN1		COG5126(D:Cell cycle control, cell division, chromosome partitioning); COG5126(T:Signal transduction mechanisms); COG5126(Z:Cytoskeleton)	COG5126(Calcium-binding protein); COG5126(Calcium-binding protein); COG5126(Calcium-binding protein)	sp|Q9LSQ6|PBP1_ARATH(Calcium-binding protein PBP1 OS=Arabidopsis thaliana OX=3702 GN=PBP1 PE=1 SV=1)	PF13833(EF-hand_8:EF-hand domain pair); PF00036(EF-hand_1:EF hand)
TRINITY_DN12010_c0_g1	Cluster 2	trihelix transcription factor GT-3b-like [Quercus lobata]	0.375479	-1.4132	1.08496e-05	0.000212707	yes	down	GO:0003700(molecular_function:transcription factor activity, sequence-specific DNA binding); GO:0043565(molecular_function:sequence-specific DNA binding); GO:0005634(cellular_component:nucleus)				ENOG410YYXY(S:Function unknown)	ENOG410YYXY(leucine-rich repeat extensin-like protein)	sp|O80450|TGT3B_ARATH(Trihelix transcription factor GT-3b OS=Arabidopsis thaliana OX=3702 GN=GT-3B PE=1 SV=1)
TRINITY_DN9267_c0_g2	Cluster 2	uncharacterized protein LOC116213109 [Punica granatum]	0.321966	-1.63502	1.09488e-05	0.000214076	yes	down	GO:0016021(cellular_component:integral component of membrane)				ENOG4111626(U:Intracellular trafficking, secretion, and vesicular transport)	ENOG4111626(-)
TRINITY_DN12209_c1_g1	Cluster 2	transcription factor MYB8-like [Punica granatum]	0.422584	-1.24269	1.12552e-05	0.000219336	yes	down	GO:0043565(molecular_function:sequence-specific DNA binding); GO:0044212(molecular_function:transcription regulatory region DNA binding); GO:0003700(molecular_function:transcription factor activity, sequence-specific DNA binding); GO:0005634(cellular_component:nucleus); GO:0030154(biological_process:cell differentiation); GO:0003677(molecular_function:DNA binding)	K09422	MYBP		COG5147(K:Transcription)	COG5147(Myblike DNAbinding domain containing protein)	sp|A0A4D6Q411|MYB1_CROXC(Transcription factor MYB1 OS=Crocosmia x crocosmiiflora OX=1053288 GN=MYB1 PE=2 SV=1)	PF00249(Myb_DNA-binding:Myb-like DNA-binding domain); PF13921(Myb_DNA-bind_6:Myb-like DNA-binding domain)
TRINITY_DN13948_c0_g3	Cluster 2	NAC domain-containing protein 45-like [Punica granatum]	0.474141	-1.07661	1.22582e-05	0.000235424	yes	down	GO:0006355(biological_process:regulation of transcription, DNA-templated); GO:0016021(cellular_component:integral component of membrane); GO:0005634(cellular_component:nucleus); GO:0003677(molecular_function:DNA binding)				ENOG4111M0G(S:Function unknown)	ENOG4111M0G(NAC domain-containing protein 74-like)	sp|Q9FFI5|NAC86_ARATH(NAC domain-containing protein 86 OS=Arabidopsis thaliana OX=3702 GN=NAC086 PE=2 SV=1)	PF02365(NAM:No apical meristem (NAM) protein)
TRINITY_DN8531_c0_g1	Cluster 2	citrate-binding protein-like isoform X1 [Punica granatum]	0.328985	-1.60391	1.28479e-05	0.000245281	yes	down					ENOG410YG69(S:Function unknown); ENOG4111XR0(S:Function unknown)	ENOG410YG69(Alginate lyase); ENOG4111XR0(Alginate lyase)	sp|Q39962|CBPR_HEVBR(Citrate-binding protein OS=Hevea brasiliensis OX=3981 GN=CBP PE=1 SV=1)
TRINITY_DN17112_c0_g1	Cluster 2	lactosylceramide 4-alpha-galactosyltransferase-like [Rosa chinensis]	0.444307	-1.17037	1.37037e-05	0.000258622	yes	down	GO:0016021(cellular_component:integral component of membrane); GO:0016757(molecular_function:transferase activity, transferring glycosyl groups)	K01988	A4GALT	map00601(Glycosphingolipid biosynthesis - lacto and neolacto series); map00603(Glycosphingolipid biosynthesis - globo and isoglobo series)	ENOG4111PD8(S:Function unknown)	ENOG4111PD8(embryonic flower)	sp|P0C8Q4|Y4990_ARATH(Uncharacterized protein At4g19900 OS=Arabidopsis thaliana OX=3702 GN=At4g19900 PE=2 SV=1)	PF04572(Gb3_synth:Alpha 1,4-glycosyltransferase conserved region); PF04488(Gly_transf_sug:Glycosyltransferase sugar-binding region containing DXD motif)
TRINITY_DN10314_c0_g2	Cluster 2	hypothetical protein CDL15_Pgr025017 [Punica granatum]	0.132969	-2.91083	1.43512e-05	0.00026809	yes	down	GO:0003677(molecular_function:DNA binding)	K09422	MYBP		COG5147(K:Transcription)	COG5147(Myblike DNAbinding domain containing protein)	sp|Q9LX82|MYB48_ARATH(Transcription factor MYB48 OS=Arabidopsis thaliana OX=3702 GN=MYB48 PE=2 SV=1)	PF00249(Myb_DNA-binding:Myb-like DNA-binding domain); PF13921(Myb_DNA-bind_6:Myb-like DNA-binding domain)
TRINITY_DN31004_c0_g1	Cluster 2	dirigent protein 21-like [Punica granatum]	0.435751	-1.19842	1.47819e-05	0.000273988	yes	down	GO:0048046(cellular_component:apoplast)				ENOG410YGJA(S:Function unknown); ENOG410YIMF(S:Function unknown)	ENOG410YGJA(Disease resistance response protein); ENOG410YIMF(Dirigent-like protein)	sp|Q9FIG7|DIR2_ARATH(Dirigent protein 2 OS=Arabidopsis thaliana OX=3702 GN=DIR2 PE=2 SV=1)	PF03018(Dirigent:Dirigent-like protein)
TRINITY_DN3301_c0_g1	Cluster 2	hypothetical protein CRG98_027698 [Punica granatum]	0.47516	-1.07352	1.49667e-05	0.000276724	yes	down					ENOG4110M78(S:Function unknown)	ENOG4110M78(Plant pleckstrin homology-like region)	sp|Q8W4K5|VAB_ARATH(VAN3-binding protein OS=Arabidopsis thaliana OX=3702 GN=VAB PE=1 SV=1)	PF05703(Auxin_canalis:Auxin canalisation); PF08458(PH_2:Plant pleckstrin homology-like region)
TRINITY_DN8079_c0_g1	Cluster 2	hypothetical protein CDL15_Pgr012842 [Punica granatum]	0.38784	-1.36647	1.51262e-05	0.000278575	yes	down					ENOG410YP5G(S:Function unknown)	ENOG410YP5G(RING)
TRINITY_DN9051_c0_g1	Cluster 2	uncharacterized protein LOC116215346 isoform X1 [Punica granatum]	0.470375	-1.08812	1.54375e-05	0.000283642	yes	down					ENOG410XUP5(S:Function unknown)	ENOG410XUP5(expressed protein)		PF04784(DUF547:Protein of unknown function, DUF547); PF14389(Lzipper-MIP1:Leucine-zipper of ternary complex factor MIP1)
TRINITY_DN9542_c0_g1	Cluster 2	hypothetical protein CRG98_038079 [Punica granatum]	0.44116	-1.18062	1.90097e-05	0.000337433	yes	down					ENOG410XRSQ(S:Function unknown)	ENOG410XRSQ(Transfer protein)	sp|F4JYJ3|SFH11_ARATH(Phosphatidylinositol/phosphatidylcholine transfer protein SFH11 OS=Arabidopsis thaliana OX=3702 GN=SFH11 PE=3 SV=1)	PF00650(CRAL_TRIO:CRAL/TRIO domain)
TRINITY_DN2603_c0_g1	Cluster 2	probable caffeoyl-CoA O-methyltransferase At4g26220 isoform X2 [Punica granatum]	0.396815	-1.33346	1.94849e-05	0.000345297	yes	down	GO:0008171(molecular_function:O-methyltransferase activity); GO:0032259(biological_process:methylation)	K00588	E2.1.1.104	map00941(Flavonoid biosynthesis); map00940(Phenylpropanoid biosynthesis); map00945(Stilbenoid, diarylheptanoid and gingerol biosynthesis)	COG4122(S:Function unknown)	COG4122(O-methyltransferase)	sp|Q9C5D7|CAMT3_ARATH(Probable caffeoyl-CoA O-methyltransferase At4g26220 OS=Arabidopsis thaliana OX=3702 GN=At4g26220 PE=2 SV=1)	PF01596(Methyltransf_3:O-methyltransferase); PF13578(Methyltransf_24:Methyltransferase domain)
TRINITY_DN11907_c0_g1	Cluster 2	PREDICTED: uncharacterized protein LOC104420936 [Eucalyptus grandis]	0.365065	-1.45378	1.99655e-05	0.000353014	yes	down	GO:0003735(molecular_function:structural constituent of ribosome); GO:0006412(biological_process:translation); GO:0005840(cellular_component:ribosome)							PF05056(DUF674:Protein of unknown function (DUF674))
TRINITY_DN12661_c0_g1	Cluster 2	hypothetical protein CDL15_Pgr018307 [Punica granatum]	0.384936	-1.37731	2.10923e-05	0.000368898	yes	down	GO:0016021(cellular_component:integral component of membrane)				ENOG41120RW(S:Function unknown)	ENOG41120RW(expressed protein)		PF06749(DUF1218:Protein of unknown function (DUF1218))
TRINITY_DN11158_c0_g1	Cluster 2	cyclic nucleotide-gated ion channel 2-like [Punica granatum]	0.205414	-2.2834	2.1875e-05	0.000380752	yes	down	GO:0005216(molecular_function:ion channel activity); GO:0016021(cellular_component:integral component of membrane)	K05391	CNGC	map04626(Plant-pathogen interaction)	ENOG410XPSE(S:Function unknown)	ENOG410XPSE(-)	sp|O65718|CNGC2_ARATH(Cyclic nucleotide-gated ion channel 2 OS=Arabidopsis thaliana OX=3702 GN=CNGC2 PE=1 SV=1)	PF00520(Ion_trans:Ion transport protein)
TRINITY_DN5996_c0_g2	Cluster 2	hydrophobic protein RCI2B-like [Punica granatum]	0.487894	-1.03536	2.18925e-05	0.000380773	yes	down	GO:0016021(cellular_component:integral component of membrane)				COG0401(S:Function unknown)	COG0401(hydrophobic protein)		PF01679(Pmp3:Proteolipid membrane potential modulator)
TRINITY_DN11225_c1_g3	Cluster 2	protein SMAX1-LIKE 3-like [Punica granatum]	0.438587	-1.18906	2.41648e-05	0.000414458	yes	down	GO:0019538(biological_process:protein metabolic process)				COG0542(O:Posttranslational modification, protein turnover, chaperones)	COG0542(ATP-dependent CLP protease ATP-binding subunit)	sp|Q9SVD0|SMXL3_ARATH(Protein SMAX1-LIKE 3 OS=Arabidopsis thaliana OX=3702 GN=SMXL3 PE=2 SV=1)	PF02861(Clp_N:Clp amino terminal domain, pathogenicity island component)
TRINITY_DN11295_c0_g1	Cluster 2	zinc finger protein SHOOT GRAVITROPISM 5-like [Punica granatum]	0.429265	-1.22006	2.46404e-05	0.000421077	yes	down	GO:0003700(molecular_function:transcription factor activity, sequence-specific DNA binding); GO:0009630(biological_process:gravitropism); GO:0005634(cellular_component:nucleus); GO:0003676(molecular_function:nucleic acid binding)				COG5048(S:Function unknown)	COG5048(Zinc finger protein)	sp|Q9C9X7|IDD14_ARATH(Protein indeterminate-domain 14 OS=Arabidopsis thaliana OX=3702 GN=IDD14 PE=1 SV=1)	PF00096(zf-C2H2:Zinc finger, C2H2 type); PF13912(zf-C2H2_6:C2H2-type zinc finger)
TRINITY_DN10225_c0_g3	Cluster 2		0.44442	-1.17	2.56473e-05	0.000433547	yes	down
TRINITY_DN10695_c0_g1	Cluster 2	hypothetical protein CDL15_Pgr002539 [Punica granatum]	0.466667	-1.09954	2.5888e-05	0.0004373	yes	down	GO:0005794(cellular_component:Golgi apparatus); GO:0016021(cellular_component:integral component of membrane); GO:0006486(biological_process:protein glycosylation); GO:0016757(molecular_function:transferase activity, transferring glycosyl groups); GO:0005886(cellular_component:plasma membrane)				ENOG410YKBZ(S:Function unknown)	ENOG410YKBZ(CASP-like protein)	sp|A7P0P3|CSPL3_VITVI(CASP-like protein 2D1 OS=Vitis vinifera OX=29760 GN=VIT_19s0090g00570 PE=2 SV=1)	PF04535(DUF588:Domain of unknown function (DUF588))
TRINITY_DN10640_c0_g2	Cluster 2	NAC domain-containing protein 75 isoform X3 [Punica granatum]	0.424758	-1.23529	2.66086e-05	0.000447539	yes	down	GO:0006355(biological_process:regulation of transcription, DNA-templated); GO:0005634(cellular_component:nucleus); GO:0044212(molecular_function:transcription regulatory region DNA binding); GO:0003677(molecular_function:DNA binding)				ENOG410YHV1(S:Function unknown)	ENOG410YHV1(nac domain)	sp|Q9M0F8|NAC75_ARATH(NAC domain-containing protein 75 OS=Arabidopsis thaliana OX=3702 GN=NAC075 PE=2 SV=1)	PF02365(NAM:No apical meristem (NAM) protein)
TRINITY_DN17326_c0_g1	Cluster 2	NAC domain-containing protein 7-like [Punica granatum]	0.440236	-1.18365	2.73367e-05	0.000457817	yes	down	GO:0006355(biological_process:regulation of transcription, DNA-templated); GO:0005634(cellular_component:nucleus); GO:0003677(molecular_function:DNA binding)				ENOG4111EYD(S:Function unknown)	ENOG4111EYD(Nac domain-containing protein)	sp|Q9FWX2|NAC7_ARATH(NAC domain-containing protein 7 OS=Arabidopsis thaliana OX=3702 GN=NAC007 PE=1 SV=2)	PF02365(NAM:No apical meristem (NAM) protein)
TRINITY_DN15491_c0_g1	Cluster 2		0.0453069	-4.46413	2.79741e-05	0.000465832	yes	down
TRINITY_DN11516_c0_g1	Cluster 2	hypothetical protein CDL15_Pgr022014 [Punica granatum]	0.352133	-1.50581	3.70117e-05	0.000589549	yes	down					ENOG410YEIE(S:Function unknown)	ENOG410YEIE(CONTAINS InterPro DOMAIN s Munc13 homology 1 (InterPro IPR014770), Protein of)	sp|Q8RX56|UNC13_ARATH(Protein unc-13 homolog OS=Arabidopsis thaliana OX=3702 GN=PATROL1 PE=2 SV=1)	PF05664(UNC_13_homolog:Unc-13 homolog)
TRINITY_DN22163_c0_g1	Cluster 2		0.269365	-1.89236	3.79394e-05	0.000601468	yes	down
TRINITY_DN15823_c0_g2	Cluster 2	Para-nitrobenzyl esterase [Dorcoceras hygrometricum]	0.159747	-2.64614	3.98976e-05	0.000629112	yes	down	GO:0016787(molecular_function:hydrolase activity)	K01050;K01049	BCHE;ACHE	map00564(Glycerophospholipid metabolism)			sp|Q92035|ACES_BUNFA(Acetylcholinesterase OS=Bungarus fasciatus OX=8613 GN=ACHE PE=1 SV=2)	PF00135(COesterase:Carboxylesterase family); PF07859(Abhydrolase_3:alpha/beta hydrolase fold)
TRINITY_DN10481_c0_g1	Cluster 2	hypothetical protein CDL15_Pgr005795 [Punica granatum]	0.434434	-1.20279	4.21364e-05	0.000656927	yes	down	GO:0006952(biological_process:defense response); GO:0005576(cellular_component:extracellular region)				ENOG410YBG3(S:Function unknown)	ENOG410YBG3(Thaumatin family)	sp|P50699|TLPH_ARATH(Thaumatin-like protein OS=Arabidopsis thaliana OX=3702 GN=At1g18250 PE=2 SV=2)	PF00314(Thaumatin:Thaumatin family)
TRINITY_DN2181_c0_g1	Cluster 2	protein TORNADO 2 [Punica granatum]	0.450345	-1.1509	4.35561e-05	0.000674547	yes	down	GO:0009956(biological_process:radial pattern formation); GO:0009554(biological_process:megasporogenesis); GO:0010305(biological_process:leaf vascular tissue pattern formation); GO:0016021(cellular_component:integral component of membrane); GO:0009933(biological_process:meristem structural organization); GO:0009934(biological_process:regulation of meristem structural organization); GO:0005886(cell…				ENOG410YAS0(S:Function unknown)	ENOG410YAS0(Tetraspanin family)	sp|Q9FIQ5|TRN2_ARATH(Protein TORNADO 2 OS=Arabidopsis thaliana OX=3702 GN=TRN2 PE=1 SV=1)	PF00335(Tetraspanin:Tetraspanin family)
TRINITY_DN11794_c0_g1	Cluster 2	uncharacterized protein LOC116206051 [Punica granatum]	0.42526	-1.23358	4.51059e-05	0.000692618	yes	down	GO:0003824(molecular_function:catalytic activity); GO:0016829(molecular_function:lyase activity); GO:0016021(cellular_component:integral component of membrane); GO:0005975(biological_process:carbohydrate metabolic process); GO:0030246(molecular_function:carbohydrate binding)	K18195	RGL4, rhiE		ENOG410YE12(S:Function unknown)	ENOG410YE12(Rhamnogalacturonate lyase)		PF06045(Rhamnogal_lyase:Rhamnogalacturonate lyase family)
TRINITY_DN31404_c0_g1	Cluster 2	uncharacterized protein LOC116194566 [Punica granatum]	0.489207	-1.03148	4.89818e-05	0.000742649	yes	down	GO:0005504(molecular_function:fatty acid binding); GO:0009627(biological_process:systemic acquired resistance)				ENOG4111EE7(U:Intracellular trafficking, secretion, and vesicular transport)	ENOG4111EE7(Protease inhibitor seed storage lipid transfer protein)		PF14368(LTP_2:Probable lipid transfer); PF00234(Tryp_alpha_amyl:Protease inhibitor/seed storage/LTP family)
TRINITY_DN10676_c1_g1	Cluster 2	remorin-like isoform X2 [Sesamum indicum]	0.487985	-1.03509	5.10967e-05	0.0007695	yes	down					ENOG410YI71(S:Function unknown)	ENOG410YI71(Remorin family)	sp|P93788|REMO_SOLTU(Remorin OS=Solanum tuberosum OX=4113 PE=1 SV=1)	PF03763(Remorin_C:Remorin, C-terminal region)
TRINITY_DN13160_c0_g1	Cluster 2	transcription factor bHLH91-like [Punica granatum]	0.47267	-1.08109	5.82051e-05	0.00085837	yes	down	GO:0046983(molecular_function:protein dimerization activity)				ENOG4111NJY(K:Transcription)	ENOG4111NJY(basic helix-loop-helix (bHLH) family protein)	sp|Q84TK1|BH010_ARATH(Transcription factor bHLH10 OS=Arabidopsis thaliana OX=3702 GN=BHLH10 PE=1 SV=1)	PF00010(HLH:Helix-loop-helix DNA-binding domain)
TRINITY_DN11808_c0_g1	Cluster 2	methylecgonone reductase-like [Punica granatum]	0.255255	-1.96999	5.99859e-05	0.000880206	yes	down	GO:0016491(molecular_function:oxidoreductase activity)	K22374	DMAS1		COG0656(S:Function unknown)	COG0656(reductase)	sp|E7C196|MER_ERYCB(Methylecgonone reductase OS=Erythroxylum coca OX=289672 PE=1 SV=1)	PF00248(Aldo_ket_red:Aldo/keto reductase family)
TRINITY_DN12490_c0_g2	Cluster 2	probable carboxylesterase 15 isoform X1 [Punica granatum]	0.361184	-1.46919	6.09605e-05	0.000892275	yes	down	GO:0016787(molecular_function:hydrolase activity); GO:0009056(biological_process:catabolic process)				COG0657(S:Function unknown)	COG0657(synthase)	sp|Q9FG13|CXE15_ARATH(Probable carboxylesterase 15 OS=Arabidopsis thaliana OX=3702 GN=CXE15 PE=2 SV=1)	PF07859(Abhydrolase_3:alpha/beta hydrolase fold); PF12697(Abhydrolase_6:Alpha/beta hydrolase family); PF00135(COesterase:Carboxylesterase family)
TRINITY_DN6868_c0_g1	Cluster 2	uncharacterized protein LOC116210979 [Punica granatum]	0.400039	-1.32179	6.86153e-05	0.000983696	yes	down	GO:0046872(molecular_function:metal ion binding); GO:0030001(biological_process:metal ion transport)
TRINITY_DN11922_c0_g1	Cluster 2	mitochondrial outer membrane protein porin 1-like [Punica granatum]	0.198773	-2.3308	7.52087e-05	0.00106299	yes	down	GO:0005741(cellular_component:mitochondrial outer membrane); GO:0008308(molecular_function:voltage-gated anion channel activity)	K15040	VDAC2		ENOG410ZBK1(U:Intracellular trafficking, secretion, and vesicular transport)	ENOG410ZBK1(voltage-dependent anion channel)	sp|P42056|VDAC2_SOLTU(Mitochondrial outer membrane protein porin of 36 kDa OS=Solanum tuberosum OX=4113 PE=1 SV=2)	PF01459(Porin_3:Eukaryotic porin)
TRINITY_DN10655_c0_g3	Cluster 2	hypothetical protein CDL15_Pgr026511 [Punica granatum]	0.190848	-2.3895	7.63298e-05	0.00107499	yes	down	GO:0016021(cellular_component:integral component of membrane)				ENOG4111FW3(S:Function unknown)	ENOG4111FW3(Family of unknown function (DUF716))		PF04819(DUF716:Family of unknown function (DUF716))
TRINITY_DN9694_c0_g1	Cluster 2	probable serine/threonine-protein kinase PBL28 isoform X2 [Punica granatum]	0.361868	-1.46647	9.00699e-05	0.00123297	yes	down	GO:0004675(molecular_function:transmembrane receptor protein serine/threonine kinase activity); GO:0004674(molecular_function:protein serine/threonine kinase activity); GO:0006468(biological_process:protein phosphorylation); GO:0005524(molecular_function:ATP binding); GO:0005886(cellular_component:plasma membrane)				COG0515(T:Signal transduction mechanisms)	COG0515(Serine Threonine protein kinase)	sp|Q84M95|PBL28_ARATH(Probable serine/threonine-protein kinase PBL28 OS=Arabidopsis thaliana OX=3702 GN=PBL28 PE=2 SV=1)	PF00069(Pkinase:Protein kinase domain); PF07714(PK_Tyr_Ser-Thr:Protein tyrosine and serine/threonine kinase)
TRINITY_DN10961_c0_g5	Cluster 2	transcription factor bHLH62-like [Punica granatum]	0.473885	-1.07739	0.000102978	0.00137689	yes	down	GO:0003700(molecular_function:transcription factor activity, sequence-specific DNA binding); GO:0006355(biological_process:regulation of transcription, DNA-templated); GO:0046983(molecular_function:protein dimerization activity); GO:0005634(cellular_component:nucleus); GO:0003677(molecular_function:DNA binding)				ENOG4111T9V(K:Transcription)	ENOG4111T9V(Transcription factor)	sp|Q9SRT2|BH062_ARATH(Transcription factor bHLH62 OS=Arabidopsis thaliana OX=3702 GN=BHLH62 PE=2 SV=1)	PF00010(HLH:Helix-loop-helix DNA-binding domain)
TRINITY_DN11668_c0_g1	Cluster 2	purple acid phosphatase 3-like [Punica granatum]	0.27421	-1.86665	0.000103034	0.00137689	yes	down	GO:0016021(cellular_component:integral component of membrane); GO:0046872(molecular_function:metal ion binding); GO:0003993(molecular_function:acid phosphatase activity)	K14379	ACP5	map00740(Riboflavin metabolism)	COG1409(S:Function unknown)	COG1409(Protein of unknown function (DUF568))	sp|Q8H129|PPA3_ARATH(Purple acid phosphatase 3 OS=Arabidopsis thaliana OX=3702 GN=PAP3 PE=2 SV=1)	PF00149(Metallophos:Calcineurin-like phosphoesterase)
TRINITY_DN12776_c0_g2	Cluster 2	GATA transcription factor 19 [Punica granatum]	0.256708	-1.9618	0.000112351	0.00148261	yes	down	GO:0043565(molecular_function:sequence-specific DNA binding); GO:0008270(molecular_function:zinc ion binding); GO:0006355(biological_process:regulation of transcription, DNA-templated)				COG5641(K:Transcription)	COG5641(Transcription factor)	sp|Q8LC79|GAT18_ARATH(GATA transcription factor 18 OS=Arabidopsis thaliana OX=3702 GN=GATA18 PE=1 SV=2)	PF00320(GATA:GATA zinc finger)
TRINITY_DN28573_c0_g1	Cluster 2	loganic acid O-methyltransferase-like [Punica granatum]	0.259564	-1.94584	0.000114617	0.00150827	yes	down	GO:0008168(molecular_function:methyltransferase activity); GO:0032259(biological_process:methylation)				ENOG4111PH9(S:Function unknown)	ENOG4111PH9(methyltransferase)	sp|B2KPR3|LAMT_CATRO(Loganic acid O-methyltransferase OS=Catharanthus roseus OX=4058 GN=LAMT PE=1 SV=1)	PF03492(Methyltransf_7:SAM dependent carboxyl methyltransferase)
TRINITY_DN10261_c0_g1	Cluster 2	myb-related protein 306-like [Punica granatum]	0.488647	-1.03313	0.000116989	0.00152665	yes	down	GO:0005634(cellular_component:nucleus); GO:0003677(molecular_function:DNA binding)	K09422	MYBP		COG5147(K:Transcription)	COG5147(Myblike DNAbinding domain containing protein)	sp|P81392|MYB06_ANTMA(Myb-related protein 306 OS=Antirrhinum majus OX=4151 GN=MYB306 PE=2 SV=1)	PF00249(Myb_DNA-binding:Myb-like DNA-binding domain)
TRINITY_DN667_c0_g2	Cluster 2	probable methyltransferase PMT15 [Punica granatum]	0.454951	-1.13622	0.0001289	0.00164816	yes	down	GO:0008168(molecular_function:methyltransferase activity); GO:0016021(cellular_component:integral component of membrane); GO:0032259(biological_process:methylation)						sp|Q9ZPH9|PMTF_ARATH(Probable methyltransferase PMT15 OS=Arabidopsis thaliana OX=3702 GN=At4g00750 PE=2 SV=1)	PF03141(Methyltransf_29:Putative S-adenosyl-L-methionine-dependent methyltransferase); PF08241(Methyltransf_11:Methyltransferase domain); PF13649(Methyltransf_25:Methyltransferase domain)
TRINITY_DN25801_c0_g1	Cluster 2		0.350995	-1.51048	0.000129139	0.00165032	yes	down
TRINITY_DN1510_c1_g1	Cluster 2	hypothetical protein DKX38_004463 [Salix brachista]	0.446633	-1.16284	0.00013301	0.00169149	yes	down	GO:0004497(molecular_function:monooxygenase activity); GO:0005506(molecular_function:iron ion binding); GO:0008610(biological_process:lipid biosynthetic process); GO:0016021(cellular_component:integral component of membrane); GO:0016491(molecular_function:oxidoreductase activity)	K14423	SMO1	map00100(Steroid biosynthesis)	COG3000(I:Lipid transport and metabolism)	COG3000(fatty acid hydroxylase)	sp|Q1EC69|SMO12_ARATH(Methylsterol monooxygenase 1-2 OS=Arabidopsis thaliana OX=3702 GN=SMO1-2 PE=2 SV=1)	PF04116(FA_hydroxylase:Fatty acid hydroxylase superfamily)
TRINITY_DN10926_c0_g1	Cluster 2	hypothetical protein FH972_013894 [Carpinus fangiana]	0.364432	-1.45628	0.000133333	0.00169377	yes	down	GO:0022857(molecular_function:transmembrane transporter activity); GO:0016021(cellular_component:integral component of membrane); GO:0005886(cellular_component:plasma membrane)				ENOG410YAV4(S:Function unknown)	ENOG410YAV4(Auxin-induced protein)	sp|Q94AP3|WAT1_ARATH(Protein WALLS ARE THIN 1 OS=Arabidopsis thaliana OX=3702 GN=WAT1 PE=1 SV=1)	PF00892(EamA:EamA-like transporter family)
TRINITY_DN11070_c0_g1	Cluster 2	hypothetical protein CDL15_Pgr007575 [Punica granatum]	0.443255	-1.17379	0.000136462	0.0017279	yes	down	GO:0016021(cellular_component:integral component of membrane); GO:0050508(molecular_function:glucuronosyl-N-acetylglucosaminyl-proteoglycan 4-alpha-N-acetylglucosaminyltransferase activity); GO:0006486(biological_process:protein glycosylation); GO:0016757(molecular_function:transferase activity, transferring glycosyl groups)				ENOG410XTFH(S:Function unknown)	ENOG410XTFH(Exostosin)	sp|Q9FFN2|GLYT3_ARATH(Probable glycosyltransferase At5g03795 OS=Arabidopsis thaliana OX=3702 GN=At5g03795 PE=3 SV=2)	PF03016(Exostosin:Exostosin family)
TRINITY_DN4891_c1_g2	Cluster 2	uncharacterized protein LOC116196061 [Punica granatum]	0.206899	-2.273	0.000146277	0.00182887	yes	down	GO:0005634(cellular_component:nucleus)
TRINITY_DN7865_c0_g1	Cluster 2	CRIB domain-containing protein RIC4 isoform X1 [Punica granatum]	0.459975	-1.12037	0.000152842	0.00189742	yes	down	GO:0016021(cellular_component:integral component of membrane)				ENOG4111EED(S:Function unknown)	ENOG4111EED(wiscott-Aldrich syndrome, C-terminal)	sp|Q9FFD5|RIC4_ARATH(CRIB domain-containing protein RIC4 OS=Arabidopsis thaliana OX=3702 GN=RIC4 PE=1 SV=1)	PF00786(PBD:P21-Rho-binding domain)
TRINITY_DN12858_c0_g1	Cluster 2	probable membrane-associated kinase regulator 3 [Punica granatum]	0.431702	-1.21189	0.000160621	0.00198037	yes	down	GO:0019210(molecular_function:kinase inhibitor activity); GO:0016301(molecular_function:kinase activity); GO:0005886(cellular_component:plasma membrane)				ENOG410YINI(S:Function unknown)	ENOG410YINI(membrane-associated kinase regulator)
TRINITY_DN28058_c0_g1	Cluster 2	uncharacterized protein LOC116195007 [Punica granatum]	0.317171	-1.65667	0.000163211	0.00200283	yes	down					ENOG410YTD2(S:Function unknown)	ENOG410YTD2(-)		PF05553(DUF761:Cotton fibre expressed protein)
TRINITY_DN29928_c0_g1	Cluster 2	hypothetical protein CRG98_043393 [Punica granatum]	0.350404	-1.51291	0.000165317	0.0020255	yes	down
TRINITY_DN10831_c0_g1	Cluster 2		0.131037	-2.93195	0.000167254	0.0020439	yes	down
TRINITY_DN8272_c1_g1	Cluster 2	hypothetical protein CDL15_Pgr003485 [Punica granatum]	0.315194	-1.66569	0.000173966	0.00211162	yes	down	GO:0006680(biological_process:glucosylceramide catabolic process); GO:0016020(cellular_component:membrane); GO:0004348(molecular_function:glucosylceramidase activity); GO:0008422(molecular_function:beta-glucosidase activity)	K17108	GBA2	map00600(Sphingolipid metabolism); map00511(Other glycan degradation)	COG4354(G:Carbohydrate transport and metabolism)	COG4354(Non-lysosomal glucosylceramidase that catalyzes the conversion of glucosylceramide to free glucose and ceramide (By similarity))	sp|Q9HCG7|GBA2_HUMAN(Non-lysosomal glucosylceramidase OS=Homo sapiens OX=9606 GN=GBA2 PE=1 SV=2)	PF04685(DUF608:Glycosyl-hydrolase family 116, catalytic region)
TRINITY_DN14848_c0_g1	Cluster 2	hypothetical protein CDL15_Pgr027037 [Punica granatum]	0.277784	-1.84797	0.000195895	0.00232135	yes	down	GO:0007165(biological_process:signal transduction); GO:0043531(molecular_function:ADP binding)						sp|A0A290U7C4|ROQ1_NICBE(Disease resistance protein Roq1 OS=Nicotiana benthamiana OX=4100 GN=ROQ1 PE=1 SV=1)	PF00931(NB-ARC:NB-ARC domain); PF13855(LRR_8:Leucine rich repeat)
TRINITY_DN7937_c0_g1	Cluster 2		0.432613	-1.20885	0.0002036	0.00238973	yes	down
TRINITY_DN25629_c0_g1	Cluster 2	hypothetical protein CDL15_Pgr028387 [Punica granatum]	0.170277	-2.55404	0.000208508	0.00243758	yes	down	GO:0016788(molecular_function:hydrolase activity, acting on ester bonds)				COG3240(S:Function unknown)	COG3240(auxin-induced protein)	sp|Q9SF78|GDL29_ARATH(GDSL esterase/lipase At1g71691 OS=Arabidopsis thaliana OX=3702 GN=At1g71691 PE=2 SV=1)	PF00657(Lipase_GDSL:GDSL-like Lipase/Acylhydrolase)
TRINITY_DN22482_c0_g1	Cluster 2	protein MALE DISCOVERER 2 isoform X1 [Punica granatum]	0.493662	-1.0184	0.000208732	0.00243898	yes	down	GO:0016021(cellular_component:integral component of membrane); GO:0005524(molecular_function:ATP binding); GO:0004672(molecular_function:protein kinase activity)				ENOG410ZQU1(T:Signal transduction mechanisms)	ENOG410ZQU1(LRR receptor-like serine threonine-protein kinase)	sp|C0LGQ4|MDIS2_ARATH(Protein MALE DISCOVERER 2 OS=Arabidopsis thaliana OX=3702 GN=MDIS2 PE=1 SV=1)	PF07714(PK_Tyr_Ser-Thr:Protein tyrosine and serine/threonine kinase); PF00069(Pkinase:Protein kinase domain); PF08263(LRRNT_2:Leucine rich repeat N-terminal domain); PF13855(LRR_8:Leucine rich repeat)
TRINITY_DN11057_c0_g1	Cluster 2	PREDICTED: peroxidase 73-like [Nelumbo nucifera]	0.396118	-1.336	0.000227325	0.00260701	yes	down	GO:0020037(molecular_function:heme binding); GO:0006979(biological_process:response to oxidative stress); GO:0005576(cellular_component:extracellular region); GO:0042744(biological_process:hydrogen peroxide catabolic process); GO:0046872(molecular_function:metal ion binding); GO:0004601(molecular_function:peroxidase activity)	K00430	E1.11.1.7	map00940(Phenylpropanoid biosynthesis)	ENOG4111FDS(G:Carbohydrate transport and metabolism)	ENOG4111FDS(peroxidase)	sp|Q9SZE7|PER51_ARATH(Peroxidase 51 OS=Arabidopsis thaliana OX=3702 GN=PER51 PE=2 SV=1)	PF00141(peroxidase:Peroxidase)
TRINITY_DN14257_c0_g1	Cluster 2		0.0980188	-3.3508	0.000229734	0.00262811	yes	down
TRINITY_DN12472_c0_g1	Cluster 2		0.433766	-1.20501	0.00023531	0.00268114	yes	down
TRINITY_DN22210_c0_g1	Cluster 2		0.162092	-2.62512	0.000247355	0.00280101	yes	down
TRINITY_DN17225_c0_g1	Cluster 2	very-long-chain aldehyde decarbonylase CER1-like isoform X2 [Punica granatum]	0.259211	-1.9478	0.000280632	0.00310003	yes	down	GO:0016020(cellular_component:membrane); GO:0005506(molecular_function:iron ion binding); GO:0008610(biological_process:lipid biosynthetic process); GO:0016021(cellular_component:integral component of membrane); GO:0016491(molecular_function:oxidoreductase activity)	K15404	K15404, CER1	map00073(Cutin, suberine and wax biosynthesis)	ENOG4111G66(S:Function unknown)	ENOG4111G66(WAX2-like)	sp|F4HVY0|CER1_ARATH(Very-long-chain aldehyde decarbonylase CER1 OS=Arabidopsis thaliana OX=3702 GN=CER1 PE=1 SV=1)	PF12076(Wax2_C:WAX2 C-terminal domain); PF04116(FA_hydroxylase:Fatty acid hydroxylase superfamily)
TRINITY_DN6765_c0_g1	Cluster 2	hypothetical protein CDL15_Pgr025952 [Punica granatum]	0.407926	-1.29362	0.00029946	0.00326649	yes	down	GO:0005524(molecular_function:ATP binding); GO:0004672(molecular_function:protein kinase activity)							PF09713(A_thal_3526:Plant protein 1589 of unknown function (A_thal_3526))
TRINITY_DN31278_c0_g1	Cluster 2	hypothetical protein CDL15_Pgr005418 [Punica granatum]	0.449858	-1.15246	0.000307676	0.00334059	yes	down	GO:0010112(biological_process:regulation of systemic acquired resistance)
TRINITY_DN15861_c0_g1	Cluster 2	BEL1-like homeodomain protein 9 [Zea mays]	0.320301	-1.6425	0.000308609	0.00334888	yes	down	GO:0006355(biological_process:regulation of transcription, DNA-templated); GO:0005634(cellular_component:nucleus); GO:0003677(molecular_function:DNA binding)							PF05920(Homeobox_KN:Homeobox KN domain)
TRINITY_DN12026_c0_g1	Cluster 2	V-type proton ATPase subunit E2 [Punica granatum]	0.17253	-2.53508	0.000311846	0.00337493	yes	down	GO:0033178(cellular_component:proton-transporting two-sector ATPase complex, catalytic domain); GO:0005773(cellular_component:vacuole); GO:0003993(molecular_function:acid phosphatase activity); GO:0046961(molecular_function:proton-transporting ATPase activity, rotational mechanism)	K02150	ATPeV1E, ATP6E	map04145(Phagosome); map00190(Oxidative phosphorylation)	COG1390(C:Energy production and conversion)	COG1390(Produces ATP from ADP in the presence of a proton gradient across the membrane (By similarity))	sp|Q9C9Z8|VATE2_ARATH(V-type proton ATPase subunit E2 OS=Arabidopsis thaliana OX=3702 GN=VHA-E2 PE=2 SV=1)	PF01991(vATP-synt_E:ATP synthase (E/31 kDa) subunit)
TRINITY_DN8359_c0_g1	Cluster 2	bidirectional sugar transporter SWEET1-like isoform X2 [Punica granatum]	0.495067	-1.0143	0.00031521	0.00340819	yes	down	GO:0016021(cellular_component:integral component of membrane); GO:0005886(cellular_component:plasma membrane); GO:0051119(molecular_function:sugar transmembrane transporter activity)	K15382	SLC50A, SWEET		ENOG4111M4R(U:Intracellular trafficking, secretion, and vesicular transport)	ENOG4111M4R(sugar transporter)	sp|Q8L9J7|SWET1_ARATH(Bidirectional sugar transporter SWEET1 OS=Arabidopsis thaliana OX=3702 GN=SWEET1 PE=1 SV=1)	PF03083(MtN3_slv:Sugar efflux transporter for intercellular exchange)
TRINITY_DN8889_c0_g1	Cluster 2	protein FAF-like, chloroplastic [Punica granatum]	0.453463	-1.14094	0.00031925	0.00344077	yes	down					ENOG410YQ65(S:Function unknown)	ENOG410YQ65(expressed protein)	sp|Q0V865|FAFL_ARATH(Protein FAF-like, chloroplastic OS=Arabidopsis thaliana OX=3702 GN=At5g22090 PE=2 SV=1)	PF11250(FAF:Fantastic Four meristem regulator)
TRINITY_DN22340_c0_g1	Cluster 2	hypothetical protein CRG98_016441 [Punica granatum]	0.30601	-1.70835	0.000322969	0.0034729	yes	down
TRINITY_DN29821_c0_g1	Cluster 2	VQ motif-containing protein 4-like [Prosopis alba]	0.495256	-1.01375	0.000332597	0.00354673	yes	down							sp|Q5M750|VQ4_ARATH(VQ motif-containing protein 4 OS=Arabidopsis thaliana OX=3702 GN=VQ4 PE=1 SV=1)	PF05678(VQ:VQ motif)
TRINITY_DN10472_c0_g1	Cluster 2	uncharacterized protein LOC115739269 [Rhodamnia argentea]	0.394814	-1.34076	0.000348557	0.00367229	yes	down	GO:0016021(cellular_component:integral component of membrane); GO:0008270(molecular_function:zinc ion binding)				COG5183(O:Posttranslational modification, protein turnover, chaperones)	COG5183((Membrane-Associated Ring finger (C3HC4)))		PF12428(DUF3675:Protein of unknown function (DUF3675))
TRINITY_DN9849_c0_g4	Cluster 2		0.446135	-1.16445	0.000366213	0.00382227	yes	down
TRINITY_DN11772_c0_g1	Cluster 2	cold-regulated 413 plasma membrane protein 2 [Punica granatum]	0.375407	-1.41347	0.000385341	0.00398293	yes	down	GO:0016021(cellular_component:integral component of membrane)						sp|Q9SVL6|CRPM2_ARATH(Cold-regulated 413 plasma membrane protein 2 OS=Arabidopsis thaliana OX=3702 GN=COR413PM2 PE=2 SV=1)	PF05562(WCOR413:Cold acclimation protein WCOR413)
TRINITY_DN11382_c1_g1	Cluster 2	uncharacterized protein LOC116187033 [Punica granatum]	0.457402	-1.12847	0.000390985	0.00403416	yes	down	GO:0016021(cellular_component:integral component of membrane)							PF04750(Far-17a_AIG1:FAR-17a/AIG1-like protein)
TRINITY_DN12482_c0_g2	Cluster 2	UPF0481 protein At3g47200-like [Punica granatum]	0.391915	-1.35139	0.000391928	0.00404034	yes	down	GO:0016021(cellular_component:integral component of membrane)						sp|P0C897|Y3264_ARATH(Putative UPF0481 protein At3g02645 OS=Arabidopsis thaliana OX=3702 GN=At3g02645 PE=3 SV=1)	PF03140(DUF247:Plant protein of unknown function)
TRINITY_DN30495_c0_g1	Cluster 2	ras-related protein RABC2a-like isoform X2 [Punica granatum]	0.192243	-2.379	0.000411571	0.00420404	yes	down	GO:0003924(molecular_function:GTPase activity); GO:0005525(molecular_function:GTP binding)	K07910	RAB18		ENOG410XPD0(S:Function unknown)	ENOG410XPD0(-)	sp|O49841|RAC2A_ARATH(Ras-related protein RABC2a OS=Arabidopsis thaliana OX=3702 GN=RABC2A PE=1 SV=1)	PF00071(Ras:Ras family); PF08477(Roc:Ras of Complex, Roc, domain of DAPkinase); PF00025(Arf:ADP-ribosylation factor family); PF04670(Gtr1_RagA:Gtr1/RagA G protein conserved region); PF01926(MMR_HSR1:50S ribosome-binding GTPase); PF00009(GTP_EFTU:Elongation factor Tu GTP binding domain); PF03193(RsgA_GTPase:RsgA GTPase); PF00735(Septin:Septin)
TRINITY_DN23393_c0_g2	Cluster 2	monothiol glutaredoxin-S1-like [Punica granatum]	0.159284	-2.65032	0.00042191	0.00428169	yes	down	GO:0045454(biological_process:cell redox homeostasis); GO:0015035(molecular_function:protein disulfide oxidoreductase activity); GO:0005623(cellular_component:cell); GO:0009055(molecular_function:electron carrier activity)	K03676	grxC, GLRX, GLRX2		COG0695(O:Posttranslational modification, protein turnover, chaperones)	COG0695(Glutaredoxin)	sp|Q8L8Z8|GRXS2_ARATH(Monothiol glutaredoxin-S2 OS=Arabidopsis thaliana OX=3702 GN=GRXS2 PE=3 SV=1)	PF00462(Glutaredoxin:Glutaredoxin)
TRINITY_DN11286_c0_g1	Cluster 2	protein DEHYDRATION-INDUCED 19 homolog 6-like isoform X2 [Hevea brasiliensis]	0.449273	-1.15434	0.000471174	0.00469234	yes	down	GO:0003735(molecular_function:structural constituent of ribosome); GO:0006412(biological_process:translation); GO:0005840(cellular_component:ribosome)				ENOG410YNHT(S:Function unknown)	ENOG410YNHT(protein DEHYDRATION-INDUCED 19 homolog)	sp|Q7XBA5|DI196_ORYSJ(Protein DEHYDRATION-INDUCED 19 homolog 6 OS=Oryza sativa subsp. japonica OX=39947 GN=DI19-6 PE=2 SV=1)	PF05605(zf-Di19:Drought induced 19 protein (Di19), zinc-binding)
TRINITY_DN12500_c0_g1	Cluster 2		0.275915	-1.8577	0.000488395	0.00483511	yes	down
TRINITY_DN10982_c0_g1	Cluster 2	calcium-binding protein KRP1-like [Punica granatum]	0.17503	-2.51433	0.000530541	0.00519319	yes	down	GO:0005509(molecular_function:calcium ion binding)	K16465	CETN1		COG5126(S:Function unknown)	COG5126(Tetratricopeptide repeat)	sp|O81831|CARP1_ARATH(Calcium-binding protein KRP1 OS=Arabidopsis thaliana OX=3702 GN=KRP1 PE=2 SV=1)	PF13833(EF-hand_8:EF-hand domain pair); PF00036(EF-hand_1:EF hand)
TRINITY_DN11100_c0_g1	Cluster 2	transcription factor MYB62 [Punica granatum]	0.274016	-1.86767	0.000620209	0.00591303	yes	down	GO:0003824(molecular_function:catalytic activity); GO:0005634(cellular_component:nucleus); GO:0006355(biological_process:regulation of transcription, DNA-templated); GO:0043565(molecular_function:sequence-specific DNA binding); GO:0003677(molecular_function:DNA binding)	K09422	MYBP		COG5147(K:Transcription)	COG5147(Myblike DNAbinding domain containing protein)	sp|Q9FGY3|MYB78_ARATH(Transcription factor MYB78 OS=Arabidopsis thaliana OX=3702 GN=MYB78 PE=2 SV=1)	PF00249(Myb_DNA-binding:Myb-like DNA-binding domain); PF13921(Myb_DNA-bind_6:Myb-like DNA-binding domain)
TRINITY_DN8445_c0_g2	Cluster 2	uncharacterized protein LOC116194236 isoform X1 [Punica granatum]	0.486542	-1.03936	0.000647199	0.00612054	yes	down
TRINITY_DN25461_c0_g1	Cluster 2	auxin-responsive protein SAUR21-like [Punica granatum]	0.49563	-1.01267	0.000699725	0.00651753	yes	down	GO:0009733(biological_process:response to auxin)	K14488	SAUR	map04075(Plant hormone signal transduction)	ENOG4111771(S:Function unknown); ENOG410ZATX(S:Function unknown)	ENOG4111771(Hydroxyproline-rich glycoprotein family protein); ENOG410ZATX(auxin-induced protein)	sp|Q9FK62|SAU24_ARATH(Auxin-responsive protein SAUR24 OS=Arabidopsis thaliana OX=3702 GN=SAUR24 PE=2 SV=1)	PF02519(Auxin_inducible:Auxin responsive protein)
TRINITY_DN13948_c0_g2	Cluster 2	NAC domain-containing protein 86 [Punica granatum]	0.397563	-1.33075	0.000704212	0.00654633	yes	down	GO:0006355(biological_process:regulation of transcription, DNA-templated); GO:0005634(cellular_component:nucleus); GO:0003677(molecular_function:DNA binding)				ENOG410YAUC(S:Function unknown)	ENOG410YAUC(NAC domain-containing protein 74-like)	sp|A4VCM0|NAC45_ARATH(NAC domain-containing protein 45 OS=Arabidopsis thaliana OX=3702 GN=NAC045 PE=2 SV=1)	PF02365(NAM:No apical meristem (NAM) protein)
TRINITY_DN5737_c0_g2	Cluster 2		0.443204	-1.17396	0.000734659	0.00678367	yes	down
TRINITY_DN7803_c1_g2	Cluster 2	dof zinc finger protein DOF1.7-like [Punica granatum]	0.473987	-1.07708	0.000782331	0.00713283	yes	down	GO:0006355(biological_process:regulation of transcription, DNA-templated); GO:0005634(cellular_component:nucleus); GO:0003677(molecular_function:DNA binding)				ENOG410YM1Y(S:Function unknown)	ENOG410YM1Y(zinc finger protein)	sp|Q84TE9|DOF53_ARATH(Dof zinc finger protein DOF5.3 OS=Arabidopsis thaliana OX=3702 GN=DOF5.3 PE=2 SV=1)	PF02701(zf-Dof:Dof domain, zinc finger)
TRINITY_DN9452_c0_g1	Cluster 2	hypothetical protein CRG98_007932 [Punica granatum]	0.462592	-1.11219	0.000843523	0.00756848	yes	down	GO:0042546(biological_process:cell wall biogenesis); GO:0005618(cellular_component:cell wall); GO:0048046(cellular_component:apoplast); GO:0071555(biological_process:cell wall organization); GO:0016762(molecular_function:xyloglucan:xyloglucosyl transferase activity); GO:0004553(molecular_function:hydrolase activity, hydrolyzing O-glycosyl compounds); GO:0010411(biological_process:xyloglucan metab…	K08235	E2.4.1.207		ENOG410YAEJ(G:Carbohydrate transport and metabolism)	ENOG410YAEJ(xyloglucan endotransglucosylase hydrolase protein)	sp|Q9ZVK1|XTH10_ARATH(Probable xyloglucan endotransglucosylase/hydrolase protein 10 OS=Arabidopsis thaliana OX=3702 GN=XTH10 PE=2 SV=1)	PF00722(Glyco_hydro_16:Glycosyl hydrolases family 16)
TRINITY_DN7458_c1_g2	Cluster 2		0.418294	-1.25741	0.000933209	0.00821976	yes	down
TRINITY_DN28350_c0_g1	Cluster 2	early nodulin-like protein 1 [Punica granatum]	0.496477	-1.0102	0.000951377	0.00832917	yes	down	GO:0016021(cellular_component:integral component of membrane); GO:0009055(molecular_function:electron carrier activity)				ENOG410YR23(S:Function unknown)	ENOG410YR23(Early nodulin-like protein)	sp|Q9SK27|ENL1_ARATH(Early nodulin-like protein 1 OS=Arabidopsis thaliana OX=3702 GN=At2g25060 PE=2 SV=2)	PF02298(Cu_bind_like:Plastocyanin-like domain)
TRINITY_DN11940_c0_g1	Cluster 2		0.055737	-4.16522	0.000980869	0.00854273	yes	down
TRINITY_DN13229_c0_g2	Cluster 2	uncharacterized protein LOC116197214 isoform X2 [Punica granatum]	0.476146	-1.07052	0.00105001	0.00901442	yes	down	GO:0016021(cellular_component:integral component of membrane)				ENOG4111YFT(S:Function unknown)	ENOG4111YFT(lysine ketoglutarate reductase trans-splicing related 1)		PF05212(DUF707:Protein of unknown function (DUF707))
TRINITY_DN11377_c0_g1	Cluster 2	uncharacterized protein LOC116200893 [Punica granatum]	0.4344	-1.2029	0.00107494	0.00919146	yes	down	GO:0006355(biological_process:regulation of transcription, DNA-templated); GO:0003712(molecular_function:transcription cofactor activity)				ENOG411198H(S:Function unknown)	ENOG411198H(-)
TRINITY_DN11643_c0_g1	Cluster 2	hypothetical protein CRG98_008067 [Punica granatum]	0.334904	-1.57818	0.00107611	0.00919807	yes	down	GO:0004322(molecular_function:ferroxidase activity); GO:0055072(biological_process:iron ion homeostasis); GO:0006826(biological_process:iron ion transport); GO:0005886(cellular_component:plasma membrane); GO:0005507(molecular_function:copper ion binding); GO:0016491(molecular_function:oxidoreductase activity)	K00423	E1.10.3.3	map00053(Ascorbate and aldarate metabolism)	COG2132(Q:Secondary metabolites biosynthesis, transport and catabolism)	COG2132(hydroperoxide lyase)	sp|Q00624|ASOL_BRANA(L-ascorbate oxidase homolog OS=Brassica napus OX=3708 GN=Bp10 PE=2 SV=1)	PF00394(Cu-oxidase:Multicopper oxidase); PF07732(Cu-oxidase_3:Multicopper oxidase)
TRINITY_DN11863_c0_g1	Cluster 2	uncharacterized protein LOC116212618 isoform X2 [Punica granatum]	0.472762	-1.08081	0.00119579	0.00996334	yes	down					ENOG410XXIE(S:Function unknown)	ENOG410XXIE(Nucleolar protein)		PF10358(NT-C2:N-terminal C2 in EEIG1 and EHBP1 proteins)
TRINITY_DN26876_c0_g1	Cluster 2	LOW QUALITY PROTEIN: glutaredoxin-C10-like [Punica granatum]	0.180846	-2.46717	0.00121635	0.0101095	yes	down	GO:0045454(biological_process:cell redox homeostasis); GO:0015035(molecular_function:protein disulfide oxidoreductase activity); GO:0008794(molecular_function:arsenate reductase (glutaredoxin) activity); GO:0005623(cellular_component:cell); GO:0009055(molecular_function:electron carrier activity)	K03676	grxC, GLRX, GLRX2		COG0695(O:Posttranslational modification, protein turnover, chaperones)	COG0695(Glutaredoxin)	sp|Q8L9S3|GRXC6_ARATH(Glutaredoxin-C6 OS=Arabidopsis thaliana OX=3702 GN=GRXC6 PE=2 SV=2)	PF00462(Glutaredoxin:Glutaredoxin)
TRINITY_DN14490_c0_g1	Cluster 2	hypothetical protein CRG98_039523 [Punica granatum]	0.466781	-1.09918	0.00130266	0.0106794	yes	down	GO:0016021(cellular_component:integral component of membrane)				ENOG410ZD7A(S:Function unknown)	ENOG410ZD7A(-)
TRINITY_DN11382_c0_g3	Cluster 2	uncharacterized protein LOC116212935 [Punica granatum]	0.346668	-1.52837	0.00133136	0.0108624	yes	down	GO:0016021(cellular_component:integral component of membrane)				ENOG410YBEC(S:Function unknown); ENOG41123NR(S:Function unknown)	ENOG410YBEC(-); ENOG41123NR(-)
TRINITY_DN6344_c0_g1	Cluster 2	histidine-containing phosphotransfer protein 4-like isoform X1 [Syzygium oleosum]	0.484289	-1.04606	0.00137012	0.0111235	yes	down	GO:0005737(cellular_component:cytoplasm); GO:0009736(biological_process:cytokinin-activated signaling pathway); GO:0016310(biological_process:phosphorylation); GO:0005634(cellular_component:nucleus); GO:0009927(molecular_function:histidine phosphotransfer kinase activity); GO:0000160(biological_process:phosphorelay signal transduction system); GO:0043424(molecular_function:protein histidine kinas…	K14490	AHP	map04075(Plant hormone signal transduction)	COG2198(T:Signal transduction mechanisms)	COG2198(Histidine kinase)	sp|Q0DK78|PHP2_ORYSJ(Pseudo histidine-containing phosphotransfer protein 2 OS=Oryza sativa subsp. japonica OX=39947 GN=PHP2 PE=2 SV=3)	PF01627(Hpt:Hpt domain)
TRINITY_DN19535_c0_g1	Cluster 2	FCS-Like Zinc finger 15-like [Punica granatum]	0.46137	-1.116	0.00152278	0.0121033	yes	down	GO:0000932(cellular_component:cytoplasmic mRNA processing body)				ENOG410YVCD(S:Function unknown)	ENOG410YVCD(Whole genome shotgun sequence of line PN40024, scaffold_77.assembly12x (Fragment))	sp|Q9FH22|FLZ15_ARATH(FCS-Like Zinc finger 15 OS=Arabidopsis thaliana OX=3702 GN=FLZ15 PE=1 SV=1)	PF04570(zf-FLZ:zinc-finger of the FCS-type, C2-C2)
TRINITY_DN10196_c0_g1	Cluster 2		0.323216	-1.62943	0.00156367	0.0123606	yes	down
TRINITY_DN17788_c1_g1	Cluster 2	cyclic dof factor 3-like [Punica granatum]	0.482308	-1.05197	0.00161006	0.0126513	yes	down	GO:0003700(molecular_function:transcription factor activity, sequence-specific DNA binding); GO:0006355(biological_process:regulation of transcription, DNA-templated); GO:0005634(cellular_component:nucleus); GO:0016021(cellular_component:integral component of membrane); GO:0003677(molecular_function:DNA binding)				ENOG410YN7N(O:Posttranslational modification, protein turnover, chaperones)	ENOG410YN7N(AHA1, activator of heat shock 90kDa protein ATPase homolog)	sp|Q8LFV3|CDF3_ARATH(Cyclic dof factor 3 OS=Arabidopsis thaliana OX=3702 GN=CDF3 PE=1 SV=2)	PF02701(zf-Dof:Dof domain, zinc finger)
TRINITY_DN10353_c0_g1	Cluster 2	transcription factor SCREAM2-like isoform X1 [Punica granatum]	0.379378	-1.39829	0.00161654	0.0126895	yes	down	GO:0046983(molecular_function:protein dimerization activity)				ENOG410YJUZ(S:Function unknown)	ENOG410YJUZ(-)
TRINITY_DN12564_c0_g2	Cluster 2	abscisic acid 8'-hydroxylase 4-like isoform X1 [Punica granatum]	0.314262	-1.66996	0.00167876	0.013047	yes	down	GO:0004497(molecular_function:monooxygenase activity); GO:0016705(molecular_function:oxidoreductase activity, acting on paired donors, with incorporation or reduction of molecular oxygen); GO:0020037(molecular_function:heme binding); GO:0016132(biological_process:brassinosteroid biosynthetic process); GO:0016021(cellular_component:integral component of membrane); GO:0010295(molecular_function:(+)…	K09843	CYP707A	map00906(Carotenoid biosynthesis)	COG2124(Q:Secondary metabolites biosynthesis, transport and catabolism)	COG2124(Cytochrome p450)	sp|A9QNE7|ABAH1_SOLLC(Abscisic acid 8'-hydroxylase CYP707A1 OS=Solanum lycopersicum OX=4081 GN=CYP707A1 PE=2 SV=1)	PF00067(p450:Cytochrome P450)
TRINITY_DN11552_c0_g1	Cluster 2	uncharacterized protein LOC116214750 [Punica granatum]	0.494514	-1.01592	0.00169702	0.0131496	yes	down	GO:0016301(molecular_function:kinase activity); GO:0016853(molecular_function:isomerase activity)				ENOG4111E32(S:Function unknown); ENOG410Z950(S:Function unknown)	ENOG4111E32(-); ENOG410Z950(-)
TRINITY_DN12794_c0_g1	Cluster 2	probable pectin methylesterase CGR2 [Punica granatum]	0.294768	-1.76235	0.00178162	0.0136608	yes	down	GO:0016021(cellular_component:integral component of membrane)	K23871	CGR		ENOG4111QN3(S:Function unknown)	ENOG4111QN3(-)	sp|Q9M2Y6|CGR2_ARATH(Probable pectin methylesterase CGR2 OS=Arabidopsis thaliana OX=3702 GN=CGR2 PE=2 SV=1)
TRINITY_DN4347_c0_g1	Cluster 2	uncharacterized protein LOC116197584 [Punica granatum]	0.399828	-1.32255	0.00189312	0.0143331	yes	down	GO:0016787(molecular_function:hydrolase activity); GO:0016021(cellular_component:integral component of membrane)				ENOG410YWUH(S:Function unknown)	ENOG410YWUH(expressed protein)
TRINITY_DN31433_c0_g1	Cluster 2	hypothetical protein CDL15_Pgr028754 [Punica granatum]	0.324111	-1.62544	0.00199605	0.0149008	yes	down					ENOG41117YF(S:Function unknown)	ENOG41117YF(-)
TRINITY_DN13753_c0_g2	Cluster 2	mitochondrial intermediate peptidase, mitochondrial isoform X4 [Punica granatum]	0.480471	-1.05748	0.00200022	0.0149257	yes	down	GO:0005759(cellular_component:mitochondrial matrix); GO:0046872(molecular_function:metal ion binding); GO:0004222(molecular_function:metalloendopeptidase activity); GO:0006627(biological_process:protein processing involved in protein targeting to mitochondrion)	K01410	MIPEP		COG0339(E:Amino acid transport and metabolism)	COG0339(oligopeptidase a)	sp|F4KDA5|MIP_ARATH(Mitochondrial intermediate peptidase, mitochondrial OS=Arabidopsis thaliana OX=3702 GN=OCT1 PE=3 SV=1)	PF01432(Peptidase_M3:Peptidase family M3)
TRINITY_DN22546_c0_g2	Cluster 2		0.252536	-1.98544	0.00204682	0.0151737	yes	down
TRINITY_DN13253_c0_g1	Cluster 2	UPF0481 protein At3g47200-like [Punica granatum]	0.274917	-1.86293	0.00206163	0.0152497	yes	down	GO:0016021(cellular_component:integral component of membrane)				ENOG410YEMY(S:Function unknown)	ENOG410YEMY(UPF0481 protein)	sp|Q9SD53|Y3720_ARATH(UPF0481 protein At3g47200 OS=Arabidopsis thaliana OX=3702 GN=At3g47200 PE=2 SV=1)	PF03140(DUF247:Plant protein of unknown function)
TRINITY_DN27932_c0_g1	Cluster 2		0.492301	-1.02239	0.00214765	0.0157322	yes	down
TRINITY_DN17790_c0_g1	Cluster 2	uncharacterized protein LOC116187015 [Punica granatum]	0.437836	-1.19154	0.00215163	0.0157564	yes	down	GO:0003676(molecular_function:nucleic acid binding)				ENOG410YD2D(S:Function unknown)	ENOG410YD2D(-)
TRINITY_DN11227_c0_g1	Cluster 2		0.287208	-1.79983	0.00224225	0.0162376	yes	down
TRINITY_DN22401_c0_g2	Cluster 2	PLASMODESMATA CALLOSE-BINDING PROTEIN 3-like [Punica granatum]	0.330829	-1.59584	0.00229971	0.0165323	yes	down	GO:0016021(cellular_component:integral component of membrane)
TRINITY_DN12343_c0_g1	Cluster 2	nudix hydrolase 2-like isoform X2 [Punica granatum]	0.43368	-1.2053	0.00231847	0.0166355	yes	down	GO:0016787(molecular_function:hydrolase activity)				ENOG410Z4GH(S:Function unknown)	ENOG410Z4GH(nudix (nucleoside diphosphate linked moiety X)-type motif 6)	sp|Q94B74|NUDT2_ARATH(Nudix hydrolase 2 OS=Arabidopsis thaliana OX=3702 GN=NUDT2 PE=1 SV=1)	PF18290(Nudix_hydro:Nudix hydrolase domain); PF00293(NUDIX:NUDIX domain)
TRINITY_DN27267_c0_g1	Cluster 2	bZIP transcription factor 44-like [Punica granatum]	0.433077	-1.2073	0.00237257	0.0169151	yes	down	GO:0003700(molecular_function:transcription factor activity, sequence-specific DNA binding); GO:0043565(molecular_function:sequence-specific DNA binding); GO:0005634(cellular_component:nucleus); GO:0045893(biological_process:positive regulation of transcription, DNA-templated); GO:0044212(molecular_function:transcription regulatory region DNA binding)				ENOG410ZM7Q(K:Transcription); ENOG410YNBU(K:Transcription)	ENOG410ZM7Q(Ocs element-binding factor); ENOG410YNBU(ocs element-binding factor 1)	sp|C0Z2L5|BZP44_ARATH(bZIP transcription factor 44 OS=Arabidopsis thaliana OX=3702 GN=BZIP44 PE=1 SV=1)	PF00170(bZIP_1:bZIP transcription factor); PF07716(bZIP_2:Basic region leucine zipper)
TRINITY_DN28712_c0_g1	Cluster 2	histone H3-2 [Nymphaea thermarum]	0.224684	-2.15403	0.00245213	0.0173497	yes	down	GO:0005634(cellular_component:nucleus); GO:0046982(molecular_function:protein heterodimerization activity); GO:0000786(cellular_component:nucleosome); GO:0016021(cellular_component:integral component of membrane); GO:0003677(molecular_function:DNA binding)	K11253	H3		COG2036(S:Function unknown)	COG2036(-)	sp|P84227|H32_BOVIN(Histone H3.2 OS=Bos taurus OX=9913 PE=1 SV=2)	PF00125(Histone:Core histone H2A/H2B/H3/H4); PF15511(CENP-T_C:Centromere kinetochore component CENP-T histone fold); PF15630(CENP-S:CENP-S protein); PF15715(PAF:PCNA-associated factor histone like domain)
TRINITY_DN10802_c0_g3	Cluster 2	Histone H4 [Ananas comosus]	0.25131	-1.99246	0.00251036	0.0176719	yes	down	GO:0016021(cellular_component:integral component of membrane); GO:0005634(cellular_component:nucleus); GO:0042025(cellular_component:host cell nucleus); GO:0006352(biological_process:DNA-templated transcription, initiation); GO:0000786(cellular_component:nucleosome); GO:0046982(molecular_function:protein heterodimerization activity); GO:0003677(molecular_function:DNA binding); GO:0006334(biologic…	K11254	H4		COG2036(S:Function unknown)	COG2036(UPF0114 protein)	sp|P62803|H4_BOVIN(Histone H4 OS=Bos taurus OX=9913 PE=1 SV=2)	PF15511(CENP-T_C:Centromere kinetochore component CENP-T histone fold); PF02969(TAF:TATA box binding protein associated factor (TAF)); PF15630(CENP-S:CENP-S protein); PF00125(Histone:Core histone H2A/H2B/H3/H4); PF00808(CBFD_NFYB_HMF:Histone-like transcription factor (CBF/NF-Y) and archaeal histone)
TRINITY_DN21649_c0_g1	Cluster 2	zinc finger protein SHOOT GRAVITROPISM 5-like [Punica granatum]	0.241235	-2.05149	0.00253798	0.0177916	yes	down	GO:0003700(molecular_function:transcription factor activity, sequence-specific DNA binding); GO:0009630(biological_process:gravitropism); GO:0005634(cellular_component:nucleus); GO:0003676(molecular_function:nucleic acid binding)				COG5048(S:Function unknown)	COG5048(Zinc finger protein)	sp|Q9C9X7|IDD14_ARATH(Protein indeterminate-domain 14 OS=Arabidopsis thaliana OX=3702 GN=IDD14 PE=1 SV=1)
TRINITY_DN12353_c0_g1	Cluster 2		0.432916	-1.20784	0.00276786	0.019095	yes	down
TRINITY_DN7059_c0_g3	Cluster 2		0.334269	-1.58092	0.00281442	0.0193764	yes	down
TRINITY_DN22511_c0_g1	Cluster 2		0.483983	-1.04697	0.00282574	0.0194152	yes	down
TRINITY_DN13637_c0_g2	Cluster 2	organic cation/carnitine transporter 3-like [Punica granatum]	0.404316	-1.30645	0.00285735	0.0195629	yes	down	GO:0022857(molecular_function:transmembrane transporter activity); GO:0016021(cellular_component:integral component of membrane)						sp|Q9SA38|OCT3_ARATH(Organic cation/carnitine transporter 3 OS=Arabidopsis thaliana OX=3702 GN=OCT3 PE=2 SV=1)	PF00083(Sugar_tr:Sugar (and other) transporter); PF07690(MFS_1:Major Facilitator Superfamily)
TRINITY_DN5205_c0_g5	Cluster 2	40S ribosomal protein S19, partial [Striga asiatica]	0.498469	-1.00442	0.00288287	0.0196744	yes	down	GO:0003735(molecular_function:structural constituent of ribosome); GO:0006412(biological_process:translation); GO:0005840(cellular_component:ribosome)	K02966	RP-S19e, RPS19	map03010(Ribosome)			sp|Q9FNP8|RS193_ARATH(40S ribosomal protein S19-3 OS=Arabidopsis thaliana OX=3702 GN=RPS19C PE=2 SV=1)	PF01090(Ribosomal_S19e:Ribosomal protein S19e)
TRINITY_DN11809_c0_g1	Cluster 2	uncharacterized protein LOC116197496 [Punica granatum]	0.496306	-1.0107	0.0029014	0.0197435	yes	down	GO:0003964(molecular_function:RNA-directed DNA polymerase activity); GO:0016021(cellular_component:integral component of membrane); GO:0004523(molecular_function:RNA-DNA hybrid ribonuclease activity); GO:0003676(molecular_function:nucleic acid binding)				ENOG410XS82(S:Function unknown)	ENOG410XS82(Retrotransposon protein)
TRINITY_DN14414_c1_g1	Cluster 2	aldehyde oxidase GLOX-like [Punica granatum]	0.292199	-1.77498	0.00301137	0.020356	yes	down					ENOG410ZZ1H(S:Function unknown)	ENOG410ZZ1H(glyoxal oxidase-related)	sp|Q9FYG4|GLOX1_ARATH(Aldehyde oxidase GLOX1 OS=Arabidopsis thaliana OX=3702 GN=GLOX1 PE=2 SV=1)	PF07250(Glyoxal_oxid_N:Glyoxal oxidase N-terminus); PF09118(DUF1929:Domain of unknown function (DUF1929))
TRINITY_DN9040_c0_g1	Cluster 2		0.404945	-1.3042	0.00306905	0.0206389	yes	down
TRINITY_DN15999_c0_g2	Cluster 2	hypothetical protein CRG98_009041 [Punica granatum]	0.241138	-2.05207	0.00307576	0.0206722	yes	down	GO:0020037(molecular_function:heme binding); GO:0006979(biological_process:response to oxidative stress); GO:0005576(cellular_component:extracellular region); GO:0042744(biological_process:hydrogen peroxide catabolic process); GO:0009505(cellular_component:plant-type cell wall); GO:0046872(molecular_function:metal ion binding); GO:0004601(molecular_function:peroxidase activity); GO:0009506(cellul…	K00430	E1.11.1.7	map00940(Phenylpropanoid biosynthesis)	ENOG410Y9ME(I:Lipid transport and metabolism)	ENOG410Y9ME(3-ketoacyl-coa synthase)	sp|Q43735|PER27_ARATH(Peroxidase 27 OS=Arabidopsis thaliana OX=3702 GN=PER27 PE=1 SV=1)	PF00141(peroxidase:Peroxidase)
TRINITY_DN6112_c1_g2	Cluster 2	NAC domain-containing protein 86 [Punica granatum]	0.452	-1.14561	0.00339019	0.0223459	yes	down	GO:0006355(biological_process:regulation of transcription, DNA-templated); GO:0005634(cellular_component:nucleus); GO:0003677(molecular_function:DNA binding)				ENOG410YAUC(S:Function unknown)	ENOG410YAUC(NAC domain-containing protein 74-like)	sp|Q9FFI5|NAC86_ARATH(NAC domain-containing protein 86 OS=Arabidopsis thaliana OX=3702 GN=NAC086 PE=2 SV=1)	PF02365(NAM:No apical meristem (NAM) protein)
TRINITY_DN12563_c0_g2	Cluster 2	3-ketoacyl-CoA synthase 12-like [Punica granatum]	0.425467	-1.23288	0.00354009	0.0230888	yes	down	GO:0006633(biological_process:fatty acid biosynthetic process); GO:0016021(cellular_component:integral component of membrane); GO:0016020(cellular_component:membrane); GO:0016747(molecular_function:transferase activity, transferring acyl groups other than amino-acyl groups)	K15397	KCS	map04626(Plant-pathogen interaction); map00062(Fatty acid elongation)	ENOG410Y9JS(Q:Secondary metabolites biosynthesis, transport and catabolism)	ENOG410Y9JS(3-ketoacyl-coa synthase)	sp|Q9SIB2|KCS12_ARATH(3-ketoacyl-CoA synthase 12 OS=Arabidopsis thaliana OX=3702 GN=KCS12 PE=2 SV=1)	PF08392(FAE1_CUT1_RppA:FAE1/Type III polyketide synthase-like protein); PF08541(ACP_syn_III_C:3-Oxoacyl-[acyl-carrier-protein (ACP)] synthase III C terminal); PF02797(Chal_sti_synt_C:Chalcone and stilbene synthases, C-terminal domain)
TRINITY_DN18506_c0_g1	Cluster 2		0.48459	-1.04516	0.00381669	0.0244184	yes	down
TRINITY_DN7178_c0_g4	Cluster 2		0.397844	-1.32972	0.00387571	0.0247108	yes	down
TRINITY_DN2919_c1_g1	Cluster 2		0.493409	-1.01915	0.00390731	0.0248785	yes	down
TRINITY_DN4368_c0_g4	Cluster 2		0.465945	-1.10177	0.0040127	0.0253877	yes	down
TRINITY_DN1089_c0_g2	Cluster 2		0.423977	-1.23794	0.00401325	0.0253877	yes	down
TRINITY_DN13285_c0_g1	Cluster 2	O-fucosyltransferase 8 isoform X3 [Punica granatum]	0.465261	-1.10389	0.00428896	0.0267298	yes	down	GO:0006004(biological_process:fucose metabolic process); GO:0016021(cellular_component:integral component of membrane); GO:0016757(molecular_function:transferase activity, transferring glycosyl groups)				ENOG410YEG1(S:Function unknown)	ENOG410YEG1(DUF246 domain-containing protein At1g04910-like)	sp|F4HZX7|OFUT8_ARATH(O-fucosyltransferase 8 OS=Arabidopsis thaliana OX=3702 GN=OFUT8 PE=2 SV=1)	PF10250(O-FucT:GDP-fucose protein O-fucosyltransferase)
TRINITY_DN22222_c0_g2	Cluster 2		0.312603	-1.6776	0.00446474	0.0275965	yes	down
TRINITY_DN23046_c1_g1	Cluster 2	DNA ligase 1 [Punica granatum]	0.253753	-1.9785	0.00452406	0.0278823	yes	down	GO:0009904(biological_process:chloroplast accumulation movement); GO:0005829(cellular_component:cytosol); GO:0005623(cellular_component:cell); GO:0009903(biological_process:chloroplast avoidance movement)				ENOG410YUWG(S:Function unknown)	ENOG410YUWG(-)		PF05701(WEMBL:Weak chloroplast movement under blue light)
TRINITY_DN540_c1_g3	Cluster 2	36.4 kDa proline-rich protein-like isoform X2 [Punica granatum]	0.472289	-1.08226	0.00457732	0.0281293	yes	down	GO:0046658(cellular_component:anchored component of plasma membrane); GO:0016301(molecular_function:kinase activity)				ENOG410YBFD(K:Transcription)	ENOG410YBFD(Transcription factor)	sp|Q9SD84|PDCB2_ARATH(PLASMODESMATA CALLOSE-BINDING PROTEIN 2 OS=Arabidopsis thaliana OX=3702 GN=PDCB2 PE=1 SV=1)	PF07983(X8:X8 domain)
TRINITY_DN13022_c0_g1	Cluster 2	RNA-binding protein 38 isoform X2 [Punica granatum]	0.487256	-1.03725	0.00474963	0.0289231	yes	down	GO:0003729(molecular_function:mRNA binding)				ENOG4111PGT(S:Function unknown)	ENOG4111PGT(RNA binding motif protein)	sp|Q9M1S3|ARP1_ARATH(Probable RNA-binding protein ARP1 OS=Arabidopsis thaliana OX=3702 GN=ARP1 PE=2 SV=1)	PF00076(RRM_1:RNA recognition motif. (a.k.a. RRM, RBD, or RNP domain))
TRINITY_DN31026_c0_g1	Cluster 2		0.357536	-1.48384	0.00480672	0.0291949	yes	down
TRINITY_DN11709_c0_g2	Cluster 2	3-oxoacyl-[acyl-carrier-protein] reductase, chloroplastic [Punica granatum]	0.307895	-1.69949	0.00493303	0.0298001	yes	down	GO:0006633(biological_process:fatty acid biosynthetic process); GO:0016616(molecular_function:oxidoreductase activity, acting on the CH-OH group of donors, NAD or NADP as acceptor); GO:0051287(molecular_function:NAD binding); GO:0030497(biological_process:fatty acid elongation); GO:0004316(molecular_function:3-oxoacyl-[acyl-carrier-protein] reductase (NADPH) activity); GO:0055114(biological_proce…	K00059	fabG, OAR1	map00780(Biotin metabolism); map00061(Fatty acid biosynthesis)	COG1028(S:Function unknown)	COG1028(Dehydrogenase reductase)	sp|P28643|FABG_CUPLA(3-oxoacyl-[acyl-carrier-protein] reductase, chloroplastic OS=Cuphea lanceolata OX=3930 GN=CLKR27 PE=2 SV=1)	PF00106(adh_short:short chain dehydrogenase); PF13561(adh_short_C2:Enoyl-(Acyl carrier protein) reductase); PF08659(KR:KR domain)
TRINITY_DN8258_c1_g2	Cluster 2	conserved hypothetical protein [Ricinus communis]	0.497338	-1.0077	0.00514502	0.0307966	yes	down	GO:0016020(cellular_component:membrane)	K17338	REEP1_2_3_4		COG5052(U:Intracellular trafficking, secretion, and vesicular transport)	COG5052(receptor accessory protein)	sp|Q8LE10|HA22I_ARATH(HVA22-like protein i OS=Arabidopsis thaliana OX=3702 GN=HVA22I PE=2 SV=2)	PF02831(gpW:gpW)
TRINITY_DN907_c1_g1	Cluster 2	hypothetical protein GW17_00009698 [Ensete ventricosum]	0.488201	-1.03445	0.00516018	0.0308416	yes	down	GO:0016740(molecular_function:transferase activity); GO:0005524(molecular_function:ATP binding)	K06689	UBE2D, UBC4, UBC5	map04120(Ubiquitin mediated proteolysis); map04141(Protein processing in endoplasmic reticulum)			sp|Q94F47|UBC28_ARATH(Ubiquitin-conjugating enzyme E2 28 OS=Arabidopsis thaliana OX=3702 GN=UBC28 PE=1 SV=1)	PF00179(UQ_con:Ubiquitin-conjugating enzyme)
TRINITY_DN13131_c0_g1	Cluster 2		0.31485	-1.66726	0.00518712	0.0309762	yes	down
TRINITY_DN18240_c0_g1	Cluster 2	uncharacterized protein LOC116202591 [Punica granatum]	0.460342	-1.11922	0.00526074	0.0312805	yes	down	GO:0016021(cellular_component:integral component of membrane); GO:0055085(biological_process:transmembrane transport)				ENOG410YWPQ(S:Function unknown)	ENOG410YWPQ(-)
TRINITY_DN11100_c0_g2	Cluster 2	transcription factor MYB62 [Punica granatum]	0.408273	-1.29239	0.00572739	0.0333351	yes	down	GO:0003824(molecular_function:catalytic activity); GO:0005634(cellular_component:nucleus); GO:0006355(biological_process:regulation of transcription, DNA-templated); GO:0003677(molecular_function:DNA binding); GO:0043565(molecular_function:sequence-specific DNA binding)	K09422	MYBP		COG5147(K:Transcription)	COG5147(Myblike DNAbinding domain containing protein)	sp|Q9C9G7|MYB62_ARATH(Transcription factor MYB62 OS=Arabidopsis thaliana OX=3702 GN=MYB62 PE=2 SV=1)
TRINITY_DN16824_c0_g2	Cluster 2	uncharacterized protein LOC116208162 isoform X1 [Punica granatum]	0.319227	-1.64734	0.00590079	0.0341347	yes	down	GO:0016021(cellular_component:integral component of membrane)				ENOG410Z44E(S:Function unknown)	ENOG410Z44E(-)
TRINITY_DN2303_c0_g2	Cluster 2	Mannosyl-oligosaccharide glucosidase [Actinidia chinensis var. chinensis]	0.334049	-1.58187	0.00590754	0.0341653	yes	down	GO:0004573(molecular_function:mannosyl-oligosaccharide glucosidase activity); GO:0016021(cellular_component:integral component of membrane); GO:0009311(biological_process:oligosaccharide metabolic process)	K01228	MOGS	map00510(N-Glycan biosynthesis); map04141(Protein processing in endoplasmic reticulum)	ENOG410XTHA(S:Function unknown)	ENOG410XTHA(mannosyloligosaccharide glucosidase)	sp|F4HTM3|GCS1_ARATH(Mannosyl-oligosaccharide glucosidase GCS1 OS=Arabidopsis thaliana OX=3702 GN=GCS1 PE=1 SV=1)	PF03200(Glyco_hydro_63:Glycosyl hydrolase family 63 C-terminal domain)
TRINITY_DN13124_c0_g1	Cluster 2	G-type lectin S-receptor-like serine/threonine-protein kinase At4g27290 [Punica granatum]	0.386749	-1.37053	0.00603903	0.0347374	yes	down	GO:0004674(molecular_function:protein serine/threonine kinase activity); GO:0016021(cellular_component:integral component of membrane); GO:0004672(molecular_function:protein kinase activity); GO:0005524(molecular_function:ATP binding); GO:0048544(biological_process:recognition of pollen)				COG0515(C:Energy production and conversion)	COG0515(alcohol dehydrogenase)	sp|O81833|SD11_ARATH(G-type lectin S-receptor-like serine/threonine-protein kinase SD1-1 OS=Arabidopsis thaliana OX=3702 GN=SD11 PE=1 SV=1)	PF08276(PAN_2:PAN-like domain); PF07714(PK_Tyr_Ser-Thr:Protein tyrosine and serine/threonine kinase)
TRINITY_DN11552_c0_g2	Cluster 2	uncharacterized protein LOC116214750 [Punica granatum]	0.33672	-1.57038	0.00617629	0.0353221	yes	down					ENOG4111E32(S:Function unknown); ENOG410Z950(S:Function unknown)	ENOG4111E32(-); ENOG410Z950(-)
TRINITY_DN7055_c0_g3	Cluster 2	putative disease resistance protein RGA1 [Punica granatum]	0.405233	-1.30318	0.00659856	0.0371187	yes	down	GO:0006952(biological_process:defense response); GO:0003860(molecular_function:3-hydroxyisobutyryl-CoA hydrolase activity); GO:0005524(molecular_function:ATP binding); GO:0043531(molecular_function:ADP binding)
TRINITY_DN24335_c0_g1	Cluster 2		0.298809	-1.74271	0.00679961	0.0380323	yes	down
TRINITY_DN12742_c0_g1	Cluster 2		0.279304	-1.84009	0.00690912	0.0385245	yes	down
TRINITY_DN13760_c0_g1	Cluster 2	PREDICTED: uncharacterized protein LOC105141831 isoform X1 [Populus euphratica]	0.408175	-1.29274	0.00696054	0.0387003	yes	down					COG4886(S:Function unknown)	COG4886(-)
TRINITY_DN10622_c0_g1	Cluster 2	actin, clone 403 [Rhodamnia argentea]	0.423661	-1.23902	0.00704959	0.0391027	yes	down	GO:0005737(cellular_component:cytoplasm); GO:0005856(cellular_component:cytoskeleton); GO:0005524(molecular_function:ATP binding)	K05692	ACTB_G1	map04145(Phagosome)	COG5277(Z:Cytoskeleton)	COG5277(Actin-related protein)	sp|P18603|ACT4_ARTSX(Actin, clone 403 OS=Artemia sp. OX=6662 PE=2 SV=1)	PF00022(Actin:Actin)
TRINITY_DN10980_c0_g1	Cluster 2	MLP-like protein 329 [Punica granatum]	0.493414	-1.01913	0.00713462	0.039416	yes	down	GO:0006952(biological_process:defense response)				ENOG41114YV(S:Function unknown)	ENOG41114YV(Bet_v_1)	sp|Q9ZVF2|ML329_ARATH(MLP-like protein 329 OS=Arabidopsis thaliana OX=3702 GN=MLP329 PE=2 SV=1)	PF00407(Bet_v_1:Pathogenesis-related protein Bet v 1 family)
TRINITY_DN9577_c0_g3	Cluster 2	uncharacterized protein LOC116205443 [Punica granatum]	0.402272	-1.31376	0.00732731	0.0401966	yes	down					ENOG410YGAA(S:Function unknown)	ENOG410YGAA(Zinc finger protein)
TRINITY_DN9783_c0_g1	Cluster 2	reticulon-like protein B9 isoform X4 [Punica granatum]	0.494612	-1.01563	0.00734918	0.0402883	yes	down	GO:0016021(cellular_component:integral component of membrane); GO:0005789(cellular_component:endoplasmic reticulum membrane)				ENOG410XPKH(U:Intracellular trafficking, secretion, and vesicular transport)	ENOG410XPKH(Reticulon)	sp|Q9LJQ5|RTNLI_ARATH(Reticulon-like protein B9 OS=Arabidopsis thaliana OX=3702 GN=RTNLB9 PE=2 SV=1)	PF02453(Reticulon:Reticulon)
TRINITY_DN13507_c0_g1	Cluster 2	nucleotide-sugar uncharacterized transporter 2 isoform X1 [Punica granatum]	0.384489	-1.37898	0.00753979	0.0410646	yes	down	GO:0005794(cellular_component:Golgi apparatus); GO:0015297(molecular_function:antiporter activity); GO:0016021(cellular_component:integral component of membrane); GO:0005338(molecular_function:nucleotide-sugar transmembrane transporter activity); GO:0008643(biological_process:carbohydrate transport); GO:0022857(molecular_function:transmembrane transporter activity); GO:0005464(molecular_function:…				ENOG410XP1S(S:Function unknown)	ENOG410XP1S(solute carrier family 35 member)	sp|Q9FG70|NSTU2_ARATH(Nucleotide-sugar uncharacterized transporter 2 OS=Arabidopsis thaliana OX=3702 GN=At5g55950 PE=2 SV=1)	PF03151(TPT:Triose-phosphate Transporter family); PF00892(EamA:EamA-like transporter family)
TRINITY_DN4699_c1_g2	Cluster 2		0.390016	-1.35839	0.00761065	0.0413832	yes	down
TRINITY_DN11436_c0_g1	Cluster 2	snakin-2-like [Camellia sinensis]	0.451676	-1.14664	0.0078805	0.0424462	yes	down	GO:0016021(cellular_component:integral component of membrane)				ENOG410YSXZ(S:Function unknown)	ENOG410YSXZ(Gibberellin regulated protein)	sp|P46687|GASA3_ARATH(Gibberellin-regulated protein 3 OS=Arabidopsis thaliana OX=3702 GN=GASA3 PE=2 SV=1)	PF02704(GASA:Gibberellin regulated protein)
TRINITY_DN10961_c0_g3	Cluster 2	uncharacterized protein LOC116198953 [Punica granatum]	0.358141	-1.4814	0.00792455	0.0426355	yes	down	GO:0016021(cellular_component:integral component of membrane)							PF04578(DUF594:Protein of unknown function, DUF594); PF13968(DUF4220:Domain of unknown function (DUF4220))
TRINITY_DN18570_c0_g2	Cluster 2		0.487939	-1.03523	0.00797573	0.0428226	yes	down
TRINITY_DN14894_c0_g2	Cluster 2	hypothetical protein CRG98_011894 [Punica granatum]	0.35414	-1.49761	0.00831637	0.0442866	yes	down					ENOG410YCGI(S:Function unknown)	ENOG410YCGI(Aminotransferase-like, plant mobile domain family protein)		PF10536(PMD:Plant mobile domain)
TRINITY_DN3896_c0_g4	Cluster 2	18.1 kDa class I heat shock protein-like [Punica granatum]	0.348972	-1.51882	0.0085189	0.0450685	yes	down		K13993	HSP20	map04141(Protein processing in endoplasmic reticulum)	COG0071(O:Posttranslational modification, protein turnover, chaperones)	COG0071(response to heat)	sp|P30236|HSP41_SOYBN(22.0 kDa class IV heat shock protein OS=Glycine max OX=3847 GN=HSP22.0 PE=3 SV=1)	PF00011(HSP20:Hsp20/alpha crystallin family); PF17886(ArsA_HSP20:HSP20-like domain found in ArsA)
TRINITY_DN20824_c0_g1	Cluster 2	beta-fructofuranosidase, insoluble isoenzyme CWINV1-like [Punica granatum]	0.475443	-1.07265	0.00866858	0.0456545	yes	down	GO:0016021(cellular_component:integral component of membrane); GO:0005975(biological_process:carbohydrate metabolic process); GO:0004564(molecular_function:beta-fructofuranosidase activity); GO:0004553(molecular_function:hydrolase activity, hydrolyzing O-glycosyl compounds)	K01193	INV, sacA	map00500(Starch and sucrose metabolism); map00052(Galactose metabolism)	COG1621(G:Carbohydrate transport and metabolism)	COG1621(Hydrolase)
TRINITY_DN29385_c0_g1	Cluster 2	uncharacterized protein LOC115726187 [Rhodamnia argentea]	0.324067	-1.62564	0.00870585	0.0457789	yes	down					ENOG410XT4M(S:Function unknown); ENOG410Z2PV(S:Function unknown)	ENOG410XT4M(-); ENOG410Z2PV(-)
TRINITY_DN8271_c0_g1	Cluster 2	NDR1/HIN1-like protein 1 [Punica granatum]	0.425201	-1.23378	0.00892417	0.0466309	yes	down	GO:0016021(cellular_component:integral component of membrane)				ENOG41119PU(S:Function unknown)	ENOG41119PU(Late embryogenesis abundant protein)	sp|Q9SRN0|NHL1_ARATH(NDR1/HIN1-like protein 1 OS=Arabidopsis thaliana OX=3702 GN=NHL1 PE=2 SV=1)	PF03168(LEA_2:Late embryogenesis abundant protein)
TRINITY_DN19774_c0_g1	Cluster 2	translation elongation factor 2-like [Rhodamnia argentea]	0.402373	-1.31339	0.0089629	0.0467786	yes	down	GO:0003746(molecular_function:translation elongation factor activity); GO:0005840(cellular_component:ribosome); GO:0003924(molecular_function:GTPase activity); GO:0016021(cellular_component:integral component of membrane); GO:0005525(molecular_function:GTP binding)	K03234	EEF2		COG0480(S:Function unknown)	COG0480(PLATZ transcription factor)	sp|P13060|EF2_DROME(Elongation factor 2 OS=Drosophila melanogaster OX=7227 GN=EF2 PE=1 SV=4)	PF00009(GTP_EFTU:Elongation factor Tu GTP binding domain); PF03764(EFG_IV:Elongation factor G, domain IV); PF00679(EFG_C:Elongation factor G C-terminus); PF14492(EFG_III:Elongation Factor G, domain III); PF03144(GTP_EFTU_D2:Elongation factor Tu domain 2)
TRINITY_DN28216_c0_g1	Cluster 2	60S ribosomal protein L7-like [Rhodamnia argentea]	0.311318	-1.68354	0.00921884	0.0477382	yes	down	GO:0003735(molecular_function:structural constituent of ribosome); GO:0000463(biological_process:maturation of LSU-rRNA from tricistronic rRNA transcript (SSU-rRNA, 5.8S rRNA, LSU-rRNA)); GO:0022625(cellular_component:cytosolic large ribosomal subunit)	K02937	RP-L7e, RPL7	map03010(Ribosome)	COG1841(J:Translation, ribosomal structure and biogenesis)	COG1841(ribosomal large subunit biogenesis)	sp|Q5ZJ56|RL7_CHICK(60S ribosomal protein L7 OS=Gallus gallus OX=9031 GN=RPL7 PE=2 SV=1)	PF08079(Ribosomal_L30_N:Ribosomal L30 N-terminal domain); PF00327(Ribosomal_L30:Ribosomal protein L30p/L7e)
TRINITY_DN25588_c0_g1	Cluster 2	peroxiredoxin-1-like [Rhodamnia argentea]	0.369511	-1.43631	0.00926665	0.0479328	yes	down	GO:0045454(biological_process:cell redox homeostasis); GO:0009507(cellular_component:chloroplast); GO:0004601(molecular_function:peroxidase activity); GO:0005623(cellular_component:cell); GO:0051920(molecular_function:peroxiredoxin activity)	K13279	PRDX1	map04146(Peroxisome)	COG0450(O:Posttranslational modification, protein turnover, chaperones)	COG0450(alkyl hydroperoxide reductase)	sp|P35704|PRDX2_RAT(Peroxiredoxin-2 OS=Rattus norvegicus OX=10116 GN=Prdx2 PE=1 SV=3)	PF00578(AhpC-TSA:AhpC/TSA family); PF10417(1-cysPrx_C:C-terminal domain of 1-Cys peroxiredoxin); PF08534(Redoxin:Redoxin)
TRINITY_DN8481_c0_g1	Cluster 2	hypothetical protein CDL15_Pgr015898 [Punica granatum]	0.385692	-1.37448	0.00928787	0.0480214	yes	down	GO:0006952(biological_process:defense response); GO:0005524(molecular_function:ATP binding); GO:0043531(molecular_function:ADP binding)						sp|Q7XBQ9|RGA2_SOLBU(Disease resistance protein RGA2 OS=Solanum bulbocastanum OX=147425 GN=RGA2 PE=1 SV=1)
TRINITY_DN15270_c0_g5	Cluster 2		0.327784	-1.60918	0.00948403	0.0487991	yes	down
TRINITY_DN5275_c0_g2	Cluster 2	hypothetical protein CDL15_Pgr008406 [Punica granatum]	0.472672	-1.08109	0.00963238	0.0494864	yes	down	GO:0031461(cellular_component:cullin-RING ubiquitin ligase complex); GO:0031625(molecular_function:ubiquitin protein ligase binding); GO:0006511(biological_process:ubiquitin-dependent protein catabolic process)	pop;K03347	;CUL1, CDC53	map04120(Ubiquitin mediated proteolysis); map04141(Protein processing in endoplasmic reticulum)	COG5647(O:Posttranslational modification, protein turnover, chaperones)	COG5647(cullin 1)	sp|Q5ZC88|CUL1_ORYSJ(Cullin-1 OS=Oryza sativa subsp. japonica OX=39947 GN=CUL1 PE=1 SV=1)	PF00888(Cullin:Cullin family)
TRINITY_DN427_c0_g1	Cluster 3	hypothetical protein CRG98_042884 [Punica granatum]	0.486522	-1.03942	4.85544e-35	6.70137e-32	yes	down	GO:0016021(cellular_component:integral component of membrane); GO:0005524(molecular_function:ATP binding); GO:0004672(molecular_function:protein kinase activity)				ENOG410XSG4(T:Signal transduction mechanisms)	ENOG410XSG4((E 0.0) leucine-rich repeat family protein protein kinase family protein)	sp|C0LGH3|Y5614_ARATH(Probable LRR receptor-like serine/threonine-protein kinase At1g56140 OS=Arabidopsis thaliana OX=3702 GN=At1g56140 PE=2 SV=2)	PF00069(Pkinase:Protein kinase domain); PF07714(PK_Tyr_Ser-Thr:Protein tyrosine and serine/threonine kinase); PF11721(Malectin:Malectin domain)
TRINITY_DN8988_c0_g1	Cluster 3	GPI mannosyltransferase 2 isoform X1 [Punica granatum]	0.497783	-1.00641	1.1765e-23	5.6335e-21	yes	down	GO:0005789(cellular_component:endoplasmic reticulum membrane); GO:0016021(cellular_component:integral component of membrane); GO:0004584(molecular_function:dolichyl-phosphate-mannose-glycolipid alpha-mannosyltransferase activity); GO:0006506(biological_process:GPI anchor biosynthetic process)	K07542	PIGV	map00563(Glycosylphosphatidylinositol (GPI)-anchor biosynthesis)	COG5542(S:Function unknown)	COG5542(Phosphatidylinositol glycan anchor biosynthesis class V)	sp|Q9NUD9|PIGV_HUMAN(GPI mannosyltransferase 2 OS=Homo sapiens OX=9606 GN=PIGV PE=1 SV=1)	PF04188(Mannosyl_trans2:Mannosyltransferase (PIG-V))
TRINITY_DN493_c0_g1	Cluster 3	hypothetical protein EZV62_003710 [Acer yangbiense]	0.169092	-2.56412	1.88397e-19	6.12428e-17	yes	down	GO:0005737(cellular_component:cytoplasm); GO:0050113(molecular_function:inositol oxygenase activity); GO:0019310(biological_process:inositol catabolic process); GO:0005506(molecular_function:iron ion binding)	K00469	MIOX	map00053(Ascorbate and aldarate metabolism); map00562(Inositol phosphate metabolism)	ENOG410XQ4J(S:Function unknown)	ENOG410XQ4J(inositol oxygenase)	sp|Q8L799|MIOX1_ARATH(Inositol oxygenase 1 OS=Arabidopsis thaliana OX=3702 GN=MIOX1 PE=2 SV=1)	PF05153(MIOX:Myo-inositol oxygenase)
TRINITY_DN2729_c0_g1	Cluster 3	protein IQ-DOMAIN 1 [Punica granatum]	0.471201	-1.08559	2.64507e-18	7.47727e-16	yes	down					ENOG4111IYP(Z:Cytoskeleton)	ENOG4111IYP(IQ-domain)	sp|Q9SF32|IQD1_ARATH(Protein IQ-DOMAIN 1 OS=Arabidopsis thaliana OX=3702 GN=IQD1 PE=1 SV=1)	PF00612(IQ:IQ calmodulin-binding motif)
TRINITY_DN7893_c0_g1	Cluster 3	subtilisin-like protease SBT4.14 [Punica granatum]	0.432761	-1.20836	3.48878e-17	8.35278e-15	yes	down	GO:0004252(molecular_function:serine-type endopeptidase activity); GO:0032440(molecular_function:2-alkenal reductase [NAD(P)] activity)				COG1404(O:Posttranslational modification, protein turnover, chaperones)	COG1404(peptidase (S8 and S53, subtilisin, kexin, sedolisin)	sp|Q9LLL8|SBT4E_ARATH(Subtilisin-like protease SBT4.14 OS=Arabidopsis thaliana OX=3702 GN=SBT4.14 PE=2 SV=1)	PF00082(Peptidase_S8:Subtilase family)
TRINITY_DN2702_c0_g1	Cluster 3	hypothetical protein CDL15_Pgr015341 [Punica granatum]	0.483607	-1.04809	7.53163e-17	1.71568e-14	yes	down	GO:0003700(molecular_function:transcription factor activity, sequence-specific DNA binding); GO:0005634(cellular_component:nucleus); GO:0003677(molecular_function:DNA binding)				ENOG4111RRZ(S:Function unknown)	ENOG4111RRZ(WD-40 repeat family protein)	sp|Q9XI33|WIN1_ARATH(Ethylene-responsive transcription factor WIN1 OS=Arabidopsis thaliana OX=3702 GN=WIN1 PE=2 SV=1)	PF00847(AP2:AP2 domain)
TRINITY_DN6033_c0_g1	Cluster 3	uncharacterized protein LOC116213874 [Punica granatum]	0.35897	-1.47807	9.27977e-16	1.70103e-13	yes	down	GO:0050661(molecular_function:NADP binding); GO:0005975(biological_process:carbohydrate metabolic process); GO:0051287(molecular_function:NAD binding); GO:0016832(molecular_function:aldehyde-lyase activity); GO:0008270(molecular_function:zinc ion binding); GO:0016491(molecular_function:oxidoreductase activity)				COG3395(S:Function unknown)	COG3395(type III effector, Hrp-dependent)	sp|Q8XGZ9|GATY_SALTI(D-tagatose-1,6-bisphosphate aldolase subunit GatY OS=Salmonella typhi OX=90370 GN=gatY PE=3 SV=1)	PF01116(F_bP_aldolase:Fructose-bisphosphate aldolase class-II); PF17042(NBD_C:Nucleotide-binding C-terminal domain)
TRINITY_DN5568_c0_g2	Cluster 3	myb family transcription factor PHL8 isoform X1 [Punica granatum]	0.398368	-1.32783	2.99306e-14	4.33495e-12	yes	down	GO:0005634(cellular_component:nucleus); GO:0003677(molecular_function:DNA binding)				ENOG4111ACN(K:Transcription)	ENOG4111ACN(Myb-like DNA-binding domain)	sp|F4I274|PHL8_ARATH(Myb family transcription factor PHL8 OS=Arabidopsis thaliana OX=3702 GN=PHL8 PE=2 SV=1)	PF14379(Myb_CC_LHEQLE:MYB-CC type transfactor, LHEQLE motif)
TRINITY_DN6421_c0_g1	Cluster 3	probable aquaporin NIP5-1 [Syzygium oleosum]	0.435477	-1.19933	3.11985e-11	2.67157e-09	yes	down	GO:0016021(cellular_component:integral component of membrane); GO:0015267(molecular_function:channel activity)	K09874	NIP		COG0580(S:Function unknown)	COG0580(Transferase)	sp|Q9SV84|NIP51_ARATH(Probable aquaporin NIP5-1 OS=Arabidopsis thaliana OX=3702 GN=NIP5-1 PE=2 SV=1)	PF00230(MIP:Major intrinsic protein)
TRINITY_DN12573_c0_g2	Cluster 3		0.315787	-1.66298	4.08546e-11	3.39919e-09	yes	down
TRINITY_DN9487_c0_g1	Cluster 3	hypothetical protein CDL15_Pgr019197 [Punica granatum]	0.357235	-1.48505	4.38063e-11	3.58128e-09	yes	down	GO:0003824(molecular_function:catalytic activity); GO:0016829(molecular_function:lyase activity); GO:0005975(biological_process:carbohydrate metabolic process); GO:0030246(molecular_function:carbohydrate binding)	K18195	RGL4, rhiE		ENOG410YE12(S:Function unknown)	ENOG410YE12(Rhamnogalacturonate lyase)	sp|Q8RJP2|RHIE_DICD3(Rhamnogalacturonate lyase OS=Dickeya dadantii (strain 3937) OX=198628 GN=rhiE PE=1 SV=1)	PF14683(CBM-like:Polysaccharide lyase family 4, domain III); PF14686(fn3_3:Polysaccharide lyase family 4, domain II)
TRINITY_DN4392_c0_g1	Cluster 3	AP2-like ethylene-responsive transcription factor At1g16060 [Punica granatum]	0.497341	-1.00769	6.12593e-11	4.80712e-09	yes	down	GO:0003700(molecular_function:transcription factor activity, sequence-specific DNA binding); GO:0005634(cellular_component:nucleus); GO:0003677(molecular_function:DNA binding)	K09285	OVM, ANT		ENOG410Y9PK(K:Transcription)	ENOG410Y9PK(Transcription factor)	sp|Q94AN4|AP2L1_ARATH(AP2-like ethylene-responsive transcription factor At1g16060 OS=Arabidopsis thaliana OX=3702 GN=At1g16060 PE=2 SV=1)	PF00847(AP2:AP2 domain)
TRINITY_DN19887_c0_g1	Cluster 3	hypothetical protein POPTR_010G221266 [Populus trichocarpa]	0.279543	-1.83886	1.64625e-10	1.18122e-08	yes	down	GO:0016021(cellular_component:integral component of membrane)
TRINITY_DN8518_c0_g1	Cluster 3		0.33884	-1.56132	4.28573e-10	2.78549e-08	yes	down
TRINITY_DN3113_c0_g1	Cluster 3		0.353607	-1.49978	7.08328e-10	4.36208e-08	yes	down
TRINITY_DN10027_c0_g1	Cluster 3	hypothetical protein CDL15_Pgr002860 [Punica granatum]	0.389994	-1.35848	2.03495e-09	1.11296e-07	yes	down	GO:0006874(biological_process:cellular calcium ion homeostasis); GO:0016021(cellular_component:integral component of membrane); GO:0070588(biological_process:calcium ion transmembrane transport); GO:0005623(cellular_component:cell); GO:0005509(molecular_function:calcium ion binding); GO:0015369(molecular_function:calcium:proton antiporter activity); GO:0055085(biological_process:transmembrane tra…				ENOG410ZVKW(P:Inorganic ion transport and metabolism)	ENOG410ZVKW(Calcium-binding EF hand family protein)	sp|Q8L636|NCL_ARATH(Sodium/calcium exchanger NCL OS=Arabidopsis thaliana OX=3702 GN=NCL PE=2 SV=1)	PF13499(EF-hand_7:EF-hand domain pair); PF13202(EF-hand_5:EF hand); PF13405(EF-hand_6:EF-hand domain); PF00036(EF-hand_1:EF hand)
TRINITY_DN10772_c0_g1	Cluster 3	uncharacterized protein LOC115725249 [Cannabis sativa]	0.360195	-1.47315	3.61587e-09	1.86368e-07	yes	down								PF13966(zf-RVT:zinc-binding in reverse transcriptase)
TRINITY_DN25664_c1_g1	Cluster 3	cold and drought-regulated protein CORA-like [Punica granatum]	0.425484	-1.23282	1.50585e-08	6.72985e-07	yes	down								PF07172(GRP:Glycine rich protein family)
TRINITY_DN19875_c0_g1	Cluster 3		0.264757	-1.91726	2.18947e-08	9.37435e-07	yes	down
TRINITY_DN6265_c0_g1	Cluster 3	hypothetical protein CDL15_Pgr020347 [Punica granatum]	0.481185	-1.05534	4.15737e-08	1.6561e-06	yes	down	GO:0016021(cellular_component:integral component of membrane); GO:0009506(cellular_component:plasmodesma)				ENOG410YCA0(S:Function unknown)	ENOG410YCA0(ER membrane protein complex subunit 2)	sp|Q0WPN8|PDLP7_ARATH(Plasmodesmata-located protein 7 OS=Arabidopsis thaliana OX=3702 GN=PDLP7 PE=1 SV=1)	PF01657(Stress-antifung:Salt stress response/antifungal)
TRINITY_DN2376_c0_g2	Cluster 3	transcription factor bHLH112-like isoform X1 [Punica granatum]	0.492446	-1.02196	4.42529e-08	1.74799e-06	yes	down	GO:0046983(molecular_function:protein dimerization activity); GO:0005634(cellular_component:nucleus); GO:0001228(molecular_function:transcriptional activator activity, RNA polymerase II transcription regulatory region sequence-specific binding)				ENOG410YDUV(S:Function unknown)	ENOG410YDUV(Whole genome shotgun sequence of line PN40024, scaffold_274.assembly12x (Fragment))	sp|Q94JL3|BH112_ARATH(Transcription factor bHLH112 OS=Arabidopsis thaliana OX=3702 GN=BHLH112 PE=1 SV=1)
TRINITY_DN9784_c0_g1	Cluster 3	NAC domain-containing protein 71-like [Punica granatum]	0.250246	-1.99858	6.29483e-08	2.37072e-06	yes	down	GO:0006355(biological_process:regulation of transcription, DNA-templated); GO:0005634(cellular_component:nucleus); GO:0003677(molecular_function:DNA binding)				ENOG410YB66(S:Function unknown)	ENOG410YB66(NAC domain containing protein)	sp|O49697|NAC71_ARATH(NAC domain-containing protein 71 OS=Arabidopsis thaliana OX=3702 GN=NAC071 PE=2 SV=1)	PF02365(NAM:No apical meristem (NAM) protein)
TRINITY_DN9044_c0_g1	Cluster 3	hypothetical protein CDL15_Pgr015478 [Punica granatum]	0.268948	-1.8946	7.204e-08	2.67448e-06	yes	down	GO:0005524(molecular_function:ATP binding); GO:0004672(molecular_function:protein kinase activity)
TRINITY_DN13076_c0_g1	Cluster 3	hypothetical protein PHAVU_009G040500g [Phaseolus vulgaris]	0.467464	-1.09707	1.14449e-07	4.01992e-06	yes	down	GO:0098869(biological_process:cellular oxidant detoxification)				ENOG410ZF0Z(S:Function unknown)	ENOG410ZF0Z(-)	sp|Q9SCK2|LSU3_ARATH(Protein RESPONSE TO LOW SULFUR 3 OS=Arabidopsis thaliana OX=3702 GN=LSU3 PE=4 SV=1)
TRINITY_DN13267_c0_g1	Cluster 3	probable glutathione S-transferase parA [Punica granatum]	0.21916	-2.18994	1.21675e-07	4.25462e-06	yes	down	GO:0005737(cellular_component:cytoplasm); GO:0016740(molecular_function:transferase activity); GO:0004364(molecular_function:glutathione transferase activity); GO:0006749(biological_process:glutathione metabolic process)	K00799	GST, gst	map00480(Glutathione metabolism)	ENOG410XSIX(C:Energy production and conversion)	ENOG410XSIX(RuBisCO catalyzes two reactions the carboxylation of D- ribulose 1,5-bisphosphate, the primary event in carbon dioxide fixation, as well as the oxidative fragmentation of the pentose substrate. Both reactions occur simultaneously and in competition at the same active site)	sp|Q9SHH7|GSTUP_ARATH(Glutathione S-transferase U25 OS=Arabidopsis thaliana OX=3702 GN=GSTU25 PE=1 SV=1)	PF02798(GST_N:Glutathione S-transferase, N-terminal domain); PF13410(GST_C_2:Glutathione S-transferase, C-terminal domain); PF13417(GST_N_3:Glutathione S-transferase, N-terminal domain); PF00043(GST_C:Glutathione S-transferase, C-terminal domain); PF13409(GST_N_2:Glutathione S-transferase, N-terminal domain); PF17171(GST_C_6:Glutathione S-transferase, C-terminal domain); PF14497(GST_C_3:Glutathio…
TRINITY_DN14014_c0_g2	Cluster 3	receptor-like protein 7 [Punica granatum]	0.0945734	-3.40242	2.67353e-07	8.47688e-06	yes	down					COG4886(S:Function unknown)	COG4886(leucine Rich Repeat)	sp|Q9SRL7|RLP35_ARATH(Receptor-like protein 35 OS=Arabidopsis thaliana OX=3702 GN=RLP35 PE=3 SV=1)	PF13855(LRR_8:Leucine rich repeat); PF12799(LRR_4:Leucine Rich repeats (2 copies))
TRINITY_DN6644_c0_g1	Cluster 3	hypothetical protein CRG98_041901 [Punica granatum]	0.437845	-1.19151	3.4785e-07	1.07815e-05	yes	down	GO:0006355(biological_process:regulation of transcription, DNA-templated); GO:0005634(cellular_component:nucleus); GO:0003677(molecular_function:DNA binding)				ENOG4111FG3(K:Transcription)	ENOG4111FG3(nac domain)	sp|A0A3Q7HH64|JA2L_SOLLC(NAC domain-containing protein JA2L OS=Solanum lycopersicum OX=4081 GN=JA2L PE=2 SV=1)	PF02365(NAM:No apical meristem (NAM) protein)
TRINITY_DN4192_c0_g5	Cluster 3	leucine-rich repeat receptor-like protein kinase TDR [Punica granatum]	0.460154	-1.11981	8.51192e-07	2.40042e-05	yes	down	GO:0009755(biological_process:hormone-mediated signaling pathway); GO:0016021(cellular_component:integral component of membrane); GO:0005886(cellular_component:plasma membrane); GO:0004674(molecular_function:protein serine/threonine kinase activity); GO:0004672(molecular_function:protein kinase activity); GO:0005524(molecular_function:ATP binding)				COG4886(S:Function unknown)	COG4886(leucine Rich Repeat)	sp|Q9FII5|TDR_ARATH(Leucine-rich repeat receptor-like protein kinase TDR OS=Arabidopsis thaliana OX=3702 GN=TDR PE=1 SV=1)	PF00069(Pkinase:Protein kinase domain); PF07714(PK_Tyr_Ser-Thr:Protein tyrosine and serine/threonine kinase); PF13855(LRR_8:Leucine rich repeat); PF12799(LRR_4:Leucine Rich repeats (2 copies)); PF08263(LRRNT_2:Leucine rich repeat N-terminal domain)
TRINITY_DN15657_c0_g1	Cluster 3		0.10903	-3.1972	9.75436e-07	2.68308e-05	yes	down
TRINITY_DN8529_c0_g1	Cluster 3	uncharacterized protein LOC116213054 [Punica granatum]	0.457555	-1.12798	1.8065e-06	4.59219e-05	yes	down	GO:0016021(cellular_component:integral component of membrane); GO:0005840(cellular_component:ribosome)
TRINITY_DN2477_c0_g1	Cluster 3	protein SULFUR DEFICIENCY-INDUCED 2 [Punica granatum]	0.473573	-1.07834	4.53051e-06	0.000101334	yes	down					ENOG410YFAS(S:Function unknown)	ENOG410YFAS(male sterility MS5 family protein)	sp|Q8L730|SDI2_ARATH(Protein SULFUR DEFICIENCY-INDUCED 2 OS=Arabidopsis thaliana OX=3702 GN=At1g04770 PE=2 SV=1)
TRINITY_DN10570_c0_g1	Cluster 3	PREDICTED: heat shock protein 83-like [Pyrus x bretschneideri]	0.346017	-1.53109	1.15971e-05	0.000224696	yes	down	GO:0005737(cellular_component:cytoplasm); GO:0016021(cellular_component:integral component of membrane); GO:0006457(biological_process:protein folding); GO:0005829(cellular_component:cytosol); GO:0034605(biological_process:cellular response to heat); GO:0051082(molecular_function:unfolded protein binding); GO:0050821(biological_process:protein stabilization); GO:0005886(cellular_component:plasma …	K04079	HSP90A, htpG	map04626(Plant-pathogen interaction); map04141(Protein processing in endoplasmic reticulum)	COG0326(S:Function unknown)	COG0326(glycosyltransferase)	sp|P36182|HSP82_TOBAC(Heat shock protein 82 (Fragment) OS=Nicotiana tabacum OX=4097 GN=HSP82 PE=2 SV=1)	PF00183(HSP90:Hsp90 protein)
TRINITY_DN11821_c0_g1	Cluster 3	hypothetical protein CRG98_047626 [Punica granatum]	0.492941	-1.02051	1.21937e-05	0.000234894	yes	down	GO:0016021(cellular_component:integral component of membrane)				COG0666(G:Carbohydrate transport and metabolism)	COG0666(xyloglucan endotransglucosylase hydrolase protein)		PF13962(PGG:Domain of unknown function)
TRINITY_DN10064_c0_g4	Cluster 3		0.488718	-1.03293	1.52553e-05	0.000280513	yes	down
TRINITY_DN8941_c0_g1	Cluster 3	polygalacturonase inhibitor-like [Punica granatum]	0.469395	-1.09112	2.45824e-05	0.000420697	yes	down					ENOG410YB0Y(S:Function unknown)	ENOG410YB0Y(polygalacturonase inhibiting protein)	sp|A7PW81|PGIP_VITVI(Polygalacturonase inhibitor OS=Vitis vinifera OX=29760 GN=pgip PE=1 SV=1)	PF08263(LRRNT_2:Leucine rich repeat N-terminal domain); PF13855(LRR_8:Leucine rich repeat); PF12799(LRR_4:Leucine Rich repeats (2 copies))
TRINITY_DN18949_c0_g1	Cluster 3	uncharacterized protein LOC116209155 [Punica granatum]	0.334676	-1.57916	3.45046e-05	0.000557444	yes	down					ENOG410Z1UZ(S:Function unknown)	ENOG410Z1UZ(-)
TRINITY_DN10036_c0_g1	Cluster 3	PREDICTED: 3-isopropylmalate dehydratase large subunit [Daucus carota subsp. sativus]	0.0338103	-4.88639	4.13252e-05	0.000648137	yes	down	GO:0003861(molecular_function:3-isopropylmalate dehydratase activity); GO:0008652(biological_process:cellular amino acid biosynthetic process); GO:0051539(molecular_function:4 iron, 4 sulfur cluster binding)	K01703	leuC, IPMI-L	map00660(C5-Branched dibasic acid metabolism); map00966(Glucosinolate biosynthesis); map00290(Valine, leucine and isoleucine biosynthesis)	COG0065(E:Amino acid transport and metabolism)	COG0065(Catalyzes the isomerization between 2-isopropylmalate and 3-isopropylmalate, via the formation of 2-isopropylmaleate (By similarity))	sp|Q94AR8|LEUC_ARATH(3-isopropylmalate dehydratase large subunit, chloroplastic OS=Arabidopsis thaliana OX=3702 GN=IIL1 PE=1 SV=1)	PF00330(Aconitase:Aconitase family (aconitate hydratase))
TRINITY_DN17564_c0_g1	Cluster 3	cob gene product [Beta vulgaris subsp. vulgaris]	0.259441	-1.94652	4.38154e-05	0.00067768	yes	down	GO:0045275(cellular_component:respiratory chain complex III); GO:0016021(cellular_component:integral component of membrane); GO:0008121(molecular_function:ubiquinol-cytochrome-c reductase activity); GO:0006122(biological_process:mitochondrial electron transport, ubiquinol to cytochrome c); GO:0005743(cellular_component:mitochondrial inner membrane); GO:0022904(biological_process:respiratory elect…	K00412	CYTB, petB	map00190(Oxidative phosphorylation)	COG1290(O:Posttranslational modification, protein turnover, chaperones)	COG1290(zinc ion binding)	sp|Q36427|CYB_LOCMI(Cytochrome b OS=Locusta migratoria OX=7004 GN=MT-CYB PE=3 SV=1)	PF00033(Cytochrome_B:Cytochrome b/b6/petB); PF13631(Cytochrom_B_N_2:Cytochrome b(N-terminal)/b6/petB); PF00032(Cytochrom_B_C:Cytochrome b(C-terminal)/b6/petD)
TRINITY_DN12503_c0_g1	Cluster 3		0.481873	-1.05327	4.39051e-05	0.000678174	yes	down
TRINITY_DN11943_c0_g1	Cluster 3	linalool synthase-like protein, partial [Oenothera californica subsp. arizonica]	0.290527	-1.78326	4.4751e-05	0.000688087	yes	down	GO:0010333(molecular_function:terpene synthase activity); GO:0000287(molecular_function:magnesium ion binding)	K17982;pop	TPS04, GES;	map00904(Diterpenoid biosynthesis)	ENOG410YDYM(S:Function unknown)	ENOG410YDYM((E,E)-geranyllinalool)	sp|Q96376|LIS_CLABR(S-linalool synthase OS=Clarkia breweri OX=36903 GN=LIS PE=2 SV=1)	PF03936(Terpene_synth_C:Terpene synthase family, metal binding domain); PF19086(Terpene_syn_C_2:Terpene synthase family 2, C-terminal metal binding)
TRINITY_DN17040_c0_g1	Cluster 3	uncharacterized protein LOC113787721 [Cicer arietinum]	0.210545	-2.2478	4.6345e-05	0.00071025	yes	down					ENOG41129JI(S:Function unknown); ENOG4111DBJ(S:Function unknown); ENOG4112C4M(S:Function unknown)	ENOG41129JI(-); ENOG4111DBJ(-); ENOG4112C4M(-)
TRINITY_DN7701_c0_g2	Cluster 3	hypothetical protein CRG98_029458 [Punica granatum]	0.47241	-1.08189	5.1047e-05	0.0007695	yes	down					ENOG410XUP5(S:Function unknown)	ENOG410XUP5(expressed protein)		PF04784(DUF547:Protein of unknown function, DUF547); PF14389(Lzipper-MIP1:Leucine-zipper of ternary complex factor MIP1)
TRINITY_DN10656_c0_g1	Cluster 3	protein ELF4-LIKE 3-like [Punica granatum]	0.44371	-1.17231	6.67176e-05	0.000961518	yes	down	GO:0042753(biological_process:positive regulation of circadian rhythm); GO:0009649(biological_process:entrainment of circadian clock)				ENOG410Y56Z(S:Function unknown)	ENOG410Y56Z(early flowering)	sp|Q8S8F5|EF4L3_ARATH(Protein ELF4-LIKE 3 OS=Arabidopsis thaliana OX=3702 GN=EFL3 PE=3 SV=1)	PF07011(Elf4:Early Flowering 4 domain)
TRINITY_DN26673_c0_g1	Cluster 3		0.296953	-1.7517	7.18541e-05	0.00102301	yes	down
TRINITY_DN9860_c0_g1	Cluster 3	NAC domain-containing protein 41-like [Punica granatum]	0.48585	-1.04142	7.19297e-05	0.00102346	yes	down	GO:0006355(biological_process:regulation of transcription, DNA-templated); GO:0005634(cellular_component:nucleus); GO:0016021(cellular_component:integral component of membrane); GO:0003677(molecular_function:DNA binding)						sp|Q94F58|NAC89_ARATH(NAC domain-containing protein 89 OS=Arabidopsis thaliana OX=3702 GN=NAC089 PE=1 SV=1)	PF02365(NAM:No apical meristem (NAM) protein)
TRINITY_DN13308_c0_g1	Cluster 3	uncharacterized protein LOC116213842 [Punica granatum]	0.427338	-1.22655	9.49781e-05	0.00128739	yes	down	GO:0022857(molecular_function:transmembrane transporter activity); GO:0016021(cellular_component:integral component of membrane)				ENOG410ZVCA(G:Carbohydrate transport and metabolism)	ENOG410ZVCA(solute carrier family 46)	sp|Q96MC6|MF14A_HUMAN(Hippocampus abundant transcript 1 protein OS=Homo sapiens OX=9606 GN=MFSD14A PE=1 SV=2)	PF07690(MFS_1:Major Facilitator Superfamily); PF12832(MFS_1_like:MFS_1 like family)
TRINITY_DN7266_c0_g1	Cluster 3		0.191933	-2.38133	0.000109227	0.00144577	yes	down
TRINITY_DN14277_c0_g1	Cluster 3	proline rich protein 2, partial [Abelmoschus esculentus]	0.493311	-1.01943	0.000121148	0.00156697	yes	down					ENOG41114YU(S:Function unknown); ENOG410YKTH(S:Function unknown)	ENOG41114YU(Proline-rich protein); ENOG410YKTH(Proline-rich protein)	sp|Q00451|PRF1_SOLLC(36.4 kDa proline-rich protein OS=Solanum lycopersicum OX=4081 GN=TPRP-F1 PE=2 SV=1)	PF14547(Hydrophob_seed:Hydrophobic seed protein); PF14368(LTP_2:Probable lipid transfer); PF00234(Tryp_alpha_amyl:Protease inhibitor/seed storage/LTP family)
TRINITY_DN6738_c0_g1	Cluster 3	synaptotagmin-5-like [Punica granatum]	0.387075	-1.36932	0.000183741	0.00220744	yes	down	GO:0016021(cellular_component:integral component of membrane); GO:0008289(molecular_function:lipid binding); GO:0006869(biological_process:lipid transport)				COG5038(S:Function unknown)	COG5038(Domain-Containing protein)	sp|Q8L706|SYT5_ARATH(Synaptotagmin-5 OS=Arabidopsis thaliana OX=3702 GN=SYT5 PE=2 SV=1)	PF00168(C2:C2 domain); PF17047(SMP_LBD:Synaptotagmin-like mitochondrial-lipid-binding domain)
TRINITY_DN5950_c2_g1	Cluster 3	hypothetical protein CRG98_004753 [Punica granatum]	0.47274	-1.08088	0.00020382	0.00239112	yes	down	GO:0046622(biological_process:positive regulation of organ growth); GO:0016021(cellular_component:integral component of membrane)				ENOG4111AW2(S:Function unknown)	ENOG4111AW2(auxin-regulated gene involved in organ size)	sp|Q8RXL7|ARL_ARATH(ARGOS-like protein OS=Arabidopsis thaliana OX=3702 GN=ARL PE=2 SV=1)
TRINITY_DN12526_c0_g1	Cluster 3	hypothetical protein CDL15_Pgr016158 [Punica granatum]	0.46841	-1.09416	0.000252066	0.00284338	yes	down					ENOG4111WXF(S:Function unknown)	ENOG4111WXF(Yae1 domain containing 1)		PF09811(Yae1_N:Essential protein Yae1, N terminal)
TRINITY_DN26806_c0_g1	Cluster 3	hypothetical protein CRG98_004753 [Punica granatum]	0.495524	-1.01297	0.000334082	0.0035549	yes	down	GO:0046622(biological_process:positive regulation of organ growth); GO:0016021(cellular_component:integral component of membrane)				ENOG4111AW2(S:Function unknown)	ENOG4111AW2(auxin-regulated gene involved in organ size)
TRINITY_DN10016_c0_g1	Cluster 3	cytokinin riboside 5'-monophosphate phosphoribohydrolase LOG3 [Punica granatum]	0.269394	-1.89221	0.000568638	0.00548374	yes	down	GO:0016787(molecular_function:hydrolase activity); GO:0005829(cellular_component:cytosol); GO:0016021(cellular_component:integral component of membrane); GO:0016799(molecular_function:hydrolase activity, hydrolyzing N-glycosyl compounds); GO:0009691(biological_process:cytokinin biosynthetic process); GO:0005634(cellular_component:nucleus)	K22522	LOG		COG1611(S:Function unknown)	COG1611(decarboxylase)	sp|Q8L8B8|LOG3_ARATH(Cytokinin riboside 5'-monophosphate phosphoribohydrolase LOG3 OS=Arabidopsis thaliana OX=3702 GN=LOG3 PE=1 SV=1)	PF03641(Lysine_decarbox:Possible lysine decarboxylase)
TRINITY_DN15088_c0_g1	Cluster 3	agmatine hydroxycinnamoyltransferase 1-like [Punica granatum]	0.402551	-1.31275	0.000627873	0.00596611	yes	down	GO:0016747(molecular_function:transferase activity, transferring acyl groups other than amino-acyl groups)	K13065	E2.3.1.133, HCT	map00941(Flavonoid biosynthesis); map00940(Phenylpropanoid biosynthesis); map00945(Stilbenoid, diarylheptanoid and gingerol biosynthesis)	ENOG410XTI7(S:Function unknown)	ENOG410XTI7(Transferase family)	sp|Q7XPK7|AHT1_ORYSJ(Agmatine hydroxycinnamoyltransferase 1 OS=Oryza sativa subsp. japonica OX=39947 GN=AHT1 PE=1 SV=1)	PF02458(Transferase:Transferase family)
TRINITY_DN5465_c2_g1	Cluster 3	uncharacterized protein LOC116193958 [Punica granatum]	0.494182	-1.01689	0.000718238	0.00665562	yes	down	GO:0020037(molecular_function:heme binding); GO:0016021(cellular_component:integral component of membrane); GO:0006979(biological_process:response to oxidative stress); GO:0042744(biological_process:hydrogen peroxide catabolic process); GO:0003723(molecular_function:RNA binding); GO:0046872(molecular_function:metal ion binding); GO:0004601(molecular_function:peroxidase activity)				ENOG410YSW3(S:Function unknown)	ENOG410YSW3(-)
TRINITY_DN11382_c0_g1	Cluster 3	uncharacterized protein LOC116212935 [Punica granatum]	0.44299	-1.17465	0.000783128	0.00713454	yes	down	GO:0016021(cellular_component:integral component of membrane)				ENOG410YBEC(S:Function unknown); ENOG41123NR(S:Function unknown)	ENOG410YBEC(-); ENOG41123NR(-)
TRINITY_DN20986_c0_g1	Cluster 3	agamous-like MADS-box protein MADS1 [Punica granatum]	0.142737	-2.80857	0.000832117	0.00750632	yes	down	GO:0003700(molecular_function:transcription factor activity, sequence-specific DNA binding); GO:0046983(molecular_function:protein dimerization activity); GO:0005634(cellular_component:nucleus); GO:0045944(biological_process:positive regulation of transcription from RNA polymerase II promoter); GO:0000977(molecular_function:RNA polymerase II regulatory region sequence-specific DNA binding)	K09264	K09264		COG5068(O:Posttranslational modification, protein turnover, chaperones)	COG5068(matrix metallopeptidase)	sp|Q93XH4|MADS1_VITVI(Agamous-like MADS-box protein MADS1 OS=Vitis vinifera OX=29760 GN=MADS1 PE=2 SV=1)	PF00319(SRF-TF:SRF-type transcription factor (DNA-binding and dimerisation domain)); PF01486(K-box:K-box region)
TRINITY_DN18884_c0_g1	Cluster 3	PREDICTED: LOW QUALITY PROTEIN: uncharacterized protein LOC105976410 [Erythranthe guttata]	0.232426	-2.10516	0.000920173	0.00812387	yes	down		K06236	COL1A	map04933(AGE-RAGE signaling pathway in diabetic complications)	ENOG4111JHC(S:Function unknown)	ENOG4111JHC(senescence-associated protein)
TRINITY_DN6860_c0_g1	Cluster 3	PREDICTED: probable prolyl 4-hydroxylase 3 isoform X2 [Tarenaya hassleriana]	0.37958	-1.39752	0.000933275	0.00821976	yes	down	GO:0031418(molecular_function:L-ascorbic acid binding); GO:0005506(molecular_function:iron ion binding); GO:0016705(molecular_function:oxidoreductase activity, acting on paired donors, with incorporation or reduction of molecular oxygen); GO:0016021(cellular_component:integral component of membrane)	K00472	P4HA	map00330(Arginine and proline metabolism)	ENOG410XS5J(S:Function unknown)	ENOG410XS5J(prolyl 4-hydroxylase)	sp|F4JZ24|P4H10_ARATH(Probable prolyl 4-hydroxylase 10 OS=Arabidopsis thaliana OX=3702 GN=P4H10 PE=3 SV=1)
TRINITY_DN9882_c0_g1	Cluster 3	NAC domain-containing protein 37-like [Punica granatum]	0.326921	-1.61298	0.000946524	0.00829907	yes	down	GO:0006355(biological_process:regulation of transcription, DNA-templated); GO:0005634(cellular_component:nucleus); GO:0003677(molecular_function:DNA binding)				ENOG410YB6I(S:Function unknown)	ENOG410YB6I(NAC domain-containing protein)	sp|Q9C8W9|NAC30_ARATH(NAC domain-containing protein 30 OS=Arabidopsis thaliana OX=3702 GN=NAC030 PE=1 SV=1)	PF02365(NAM:No apical meristem (NAM) protein)
TRINITY_DN6305_c0_g3	Cluster 3		0.196947	-2.34412	0.00102449	0.00885792	yes	down
TRINITY_DN25527_c0_g1	Cluster 3		0.17959	-2.47722	0.00102889	0.0088851	yes	down
TRINITY_DN13768_c0_g1	Cluster 3		0.128701	-2.95791	0.00125397	0.0103671	yes	down
TRINITY_DN5990_c0_g1	Cluster 3	threonine--tRNA ligase, mitochondrial 1 [Punica granatum]	0.306982	-1.70377	0.00136921	0.01112	yes	down	GO:0006435(biological_process:threonyl-tRNA aminoacylation); GO:0005737(cellular_component:cytoplasm); GO:0004812(molecular_function:aminoacyl-tRNA ligase activity); GO:0004829(molecular_function:threonine-tRNA ligase activity); GO:0005739(cellular_component:mitochondrion); GO:0006418(biological_process:tRNA aminoacylation for protein translation); GO:0005524(molecular_function:ATP binding); GO:0…	K01868	TARS, thrS	map00970(Aminoacyl-tRNA biosynthesis)	COG0441(J:Translation, ribosomal structure and biogenesis)	COG0441(threonine-tRNA ligase activity)	sp|O04630|SYTM1_ARATH(Threonine--tRNA ligase, mitochondrial 1 OS=Arabidopsis thaliana OX=3702 GN=THRRS PE=1 SV=3)	PF07973(tRNA_SAD:Threonyl and Alanyl tRNA synthetase second additional domain)
TRINITY_DN6479_c0_g1	Cluster 3		0.432044	-1.21075	0.00189167	0.0143268	yes	down
TRINITY_DN12699_c0_g1	Cluster 3	hypothetical protein E1A91_D04G021800v1, partial [Gossypium mustelinum]	0.302329	-1.72581	0.00201578	0.0150242	yes	down	GO:0016021(cellular_component:integral component of membrane)				ENOG410YHTF(S:Function unknown)	ENOG410YHTF(lob domain-containing protein)	sp|Q9SK08|LBD11_ARATH(LOB domain-containing protein 11 OS=Arabidopsis thaliana OX=3702 GN=LBD11 PE=2 SV=2)	PF03195(LOB:Lateral organ boundaries (LOB) domain)
TRINITY_DN11855_c0_g1	Cluster 3	cyclin-dependent protein kinase inhibitor SMR6-like [Punica granatum]	0.395633	-1.33777	0.0021168	0.0155792	yes	down	GO:0016301(molecular_function:kinase activity); GO:0032875(biological_process:regulation of DNA endoreduplication)				ENOG411155J(S:Function unknown)	ENOG411155J(-)	sp|Q29Q81|SMR6_ARATH(Cyclin-dependent protein kinase inhibitor SMR6 OS=Arabidopsis thaliana OX=3702 GN=SMR6 PE=1 SV=1)
TRINITY_DN11621_c0_g1	Cluster 3	protein trichome birefringence-like 33 [Punica granatum]	0.497507	-1.00721	0.00216909	0.0158546	yes	down	GO:0005794(cellular_component:Golgi apparatus); GO:0016021(cellular_component:integral component of membrane); GO:0016413(molecular_function:O-acetyltransferase activity)				ENOG410ZJIP(S:Function unknown)	ENOG410ZJIP(leaf senescence related protein)	sp|F4IH21|TBL33_ARATH(Protein trichome birefringence-like 33 OS=Arabidopsis thaliana OX=3702 GN=TBL33 PE=2 SV=1)	PF13839(PC-Esterase:GDSL/SGNH-like Acyl-Esterase family found in Pmr5 and Cas1p); PF14416(PMR5N:PMR5 N terminal Domain)
TRINITY_DN21235_c0_g1	Cluster 3	UPF0481 protein At3g47200-like isoform X1 [Punica granatum]	0.309646	-1.69131	0.0023438	0.0167763	yes	down	GO:0016021(cellular_component:integral component of membrane)						sp|Q9SD53|Y3720_ARATH(UPF0481 protein At3g47200 OS=Arabidopsis thaliana OX=3702 GN=At3g47200 PE=2 SV=1)	PF03140(DUF247:Plant protein of unknown function)
TRINITY_DN10738_c0_g1	Cluster 3	uncharacterized protein LOC116206949 [Punica granatum]	0.383401	-1.38308	0.0026813	0.0186027	yes	down	GO:0016021(cellular_component:integral component of membrane)				ENOG410ZK5T(S:Function unknown)	ENOG410ZK5T(fiber expressed protein)		PF14364(DUF4408:Domain of unknown function (DUF4408)); PF05553(DUF761:Cotton fibre expressed protein)
TRINITY_DN6691_c0_g1	Cluster 3	Uncharacterized protein TCM_018583 [Theobroma cacao]	0.447818	-1.15901	0.00284779	0.0195113	yes	down	GO:0005509(molecular_function:calcium ion binding)				ENOG41116H3(S:Function unknown)	ENOG41116H3(-)
TRINITY_DN4211_c0_g1	Cluster 3	ABC transporter C family member 12-like isoform X1 [Punica granatum]	0.343878	-1.54003	0.0029143	0.0198025	yes	down		K05665	ABCC1	map02010(ABC transporters)	COG1132(S:Function unknown)	COG1132(kelch domain containing 4)	sp|Q9C8H0|AB12C_ARATH(ABC transporter C family member 12 OS=Arabidopsis thaliana OX=3702 GN=ABCC12 PE=2 SV=1)	PF00664(ABC_membrane:ABC transporter transmembrane region)
TRINITY_DN12819_c0_g1	Cluster 3	cytochrome P450 714A1-like [Punica granatum]	0.300002	-1.73696	0.003421	0.02249	yes	down	GO:0005506(molecular_function:iron ion binding); GO:0016705(molecular_function:oxidoreductase activity, acting on paired donors, with incorporation or reduction of molecular oxygen); GO:0016021(cellular_component:integral component of membrane); GO:0004497(molecular_function:monooxygenase activity); GO:0020037(molecular_function:heme binding)	K20661	CYP714A1		COG2124(S:Function unknown)	COG2124(UPF0481 protein)	sp|Q93Z79|C14A1_ARATH(Cytochrome P450 714A1 OS=Arabidopsis thaliana OX=3702 GN=CYP714A1 PE=2 SV=1)	PF00067(p450:Cytochrome P450)
TRINITY_DN16559_c0_g1	Cluster 3	uncharacterized protein LOC103626742 [Zea mays]	0.295662	-1.75798	0.00345425	0.0226816	yes	down					ENOG41119X7(S:Function unknown); ENOG410Y21X(S:Function unknown); ENOG4111JHC(S:Function unknown)	ENOG41119X7(-); ENOG410Y21X(-); ENOG4111JHC(senescence-associated protein)
TRINITY_DN22459_c0_g1	Cluster 3	tubulin alpha chain [Rhodamnia argentea]	0.41111	-1.2824	0.00384408	0.0245491	yes	down	GO:0005737(cellular_component:cytoplasm); GO:0007017(biological_process:microtubule-based process); GO:0000278(biological_process:mitotic cell cycle); GO:0003924(molecular_function:GTPase activity); GO:0005200(molecular_function:structural constituent of cytoskeleton); GO:0000226(biological_process:microtubule cytoskeleton organization); GO:0005874(cellular_component:microtubule); GO:0005525(mole…	K07374	TUBA	map04145(Phagosome)	COG5023(G:Carbohydrate transport and metabolism)	COG5023(Glycosyl hydrolase family 17 protein)	sp|Q8WQ47|TBA_LEPDS(Tubulin alpha chain OS=Lepidoglyphus destructor OX=36936 PE=1 SV=2)	PF00091(Tubulin:Tubulin/FtsZ family, GTPase domain); PF03953(Tubulin_C:Tubulin C-terminal domain)
TRINITY_DN24214_c0_g2	Cluster 3	LOB domain-containing protein 15 [Punica granatum]	0.403698	-1.30865	0.00391677	0.0249252	yes	down					ENOG4111QRV(S:Function unknown)	ENOG4111QRV(lob domain-containing protein)	sp|Q8L5T5|LBD15_ARATH(LOB domain-containing protein 15 OS=Arabidopsis thaliana OX=3702 GN=LBD15 PE=1 SV=2)	PF03195(LOB:Lateral organ boundaries (LOB) domain)
TRINITY_DN17916_c0_g1	Cluster 3	PREDICTED: peptidyl-prolyl cis-trans isomerase FKBP53 [Ipomoea nil]	0.451805	-1.14623	0.00404225	0.0255161	yes	down	GO:0003755(molecular_function:peptidyl-prolyl cis-trans isomerase activity)	K14826	FPR3_4		COG0545(T:Signal transduction mechanisms)	COG0545(Serine Threonine protein kinase)	sp|Q26486|FKBP4_SPOFR(46 kDa FK506-binding nuclear protein OS=Spodoptera frugiperda OX=7108 GN=FKBP46 PE=2 SV=1)	PF17800(NPL:Nucleoplasmin-like domain)
TRINITY_DN8554_c0_g1	Cluster 3	Ubiquitin-60S ribosomal protein L40-2 [Zea mays]	0.41913	-1.25453	0.00416778	0.0261537	yes	down	GO:0003735(molecular_function:structural constituent of ribosome); GO:0006412(biological_process:translation); GO:0005840(cellular_component:ribosome)							PF01020(Ribosomal_L40e:Ribosomal L40e family)
TRINITY_DN8711_c0_g1	Cluster 3	hypothetical protein CDL15_Pgr012565 [Punica granatum]	0.453614	-1.14046	0.00431119	0.0268382	yes	down	GO:0046872(molecular_function:metal ion binding); GO:0030001(biological_process:metal ion transport)				COG2608(S:Function unknown)	COG2608(heavy metal transport detoxification protein)	sp|Q8RXH8|NAKR3_ARATH(Protein SODIUM POTASSIUM ROOT DEFECTIVE 3 OS=Arabidopsis thaliana OX=3702 GN=NAKR3 PE=2 SV=1)
TRINITY_DN6748_c0_g1	Cluster 3	putative ubiquitin [Cinnamomum micranthum f. kanehirae]	0.430299	-1.21659	0.00452931	0.0279074	yes	down	GO:0005737(cellular_component:cytoplasm); GO:0042626(molecular_function:ATPase activity, coupled to transmembrane movement of substances); GO:0031625(molecular_function:ubiquitin protein ligase binding); GO:0005840(cellular_component:ribosome); GO:0008081(molecular_function:phosphoric diester hydrolase activity); GO:0016021(cellular_component:integral component of membrane); GO:0006281(biological…	K08770	UBC		COG5272(O:Posttranslational modification, protein turnover, chaperones)	COG5272(ubiquitin)	sp|P0CG53|UBB_BOVIN(Polyubiquitin-B OS=Bos taurus OX=9913 GN=UBB PE=1 SV=1)	PF00240(ubiquitin:Ubiquitin family); PF11976(Rad60-SLD:Ubiquitin-2 like Rad60 SUMO-like); PF14560(Ubiquitin_2:Ubiquitin-like domain)
TRINITY_DN9173_c0_g1	Cluster 3	histidine-containing phosphotransfer protein 1-like [Punica granatum]	0.450582	-1.15014	0.00471792	0.0287748	yes	down	GO:0000160(biological_process:phosphorelay signal transduction system)	K14490	AHP	map04075(Plant hormone signal transduction)	COG2198(T:Signal transduction mechanisms)	COG2198(Histidine kinase)	sp|Q9ZNV9|AHP1_ARATH(Histidine-containing phosphotransfer protein 1 OS=Arabidopsis thaliana OX=3702 GN=AHP1 PE=1 SV=1)	PF01627(Hpt:Hpt domain)
TRINITY_DN2551_c0_g7	Cluster 3		0.28879	-1.79191	0.00511787	0.0306985	yes	down
TRINITY_DN28827_c0_g1	Cluster 3		0.226324	-2.14354	0.0053443	0.0316171	yes	down
TRINITY_DN12820_c0_g6	Cluster 3	transcription factor MYB61-like [Punica granatum]	0.488212	-1.03442	0.0065493	0.0369301	yes	down	GO:0043565(molecular_function:sequence-specific DNA binding); GO:0044212(molecular_function:transcription regulatory region DNA binding); GO:0003700(molecular_function:transcription factor activity, sequence-specific DNA binding); GO:0005634(cellular_component:nucleus); GO:0030154(biological_process:cell differentiation); GO:0010119(biological_process:regulation of stomatal movement); GO:0003677(…	K09422	MYBP		COG5147(K:Transcription)	COG5147(Myblike DNAbinding domain containing protein)	sp|Q8VZQ2|MYB61_ARATH(Transcription factor MYB61 OS=Arabidopsis thaliana OX=3702 GN=MYB61 PE=2 SV=1)	PF00249(Myb_DNA-binding:Myb-like DNA-binding domain); PF13921(Myb_DNA-bind_6:Myb-like DNA-binding domain)
TRINITY_DN19102_c0_g1	Cluster 3	40S ribosomal protein S8-like [Rhodamnia argentea]	0.40305	-1.31097	0.00694516	0.0386239	yes	down	GO:0003735(molecular_function:structural constituent of ribosome); GO:0000462(biological_process:maturation of SSU-rRNA from tricistronic rRNA transcript (SSU-rRNA, 5.8S rRNA, LSU-rRNA)); GO:0022627(cellular_component:cytosolic small ribosomal subunit); GO:0006412(biological_process:translation); GO:0005840(cellular_component:ribosome)	K02995	RP-S8e, RPS8	map03010(Ribosome)	COG2007(L:Replication, recombination and repair)	COG2007(DNA polymerase III subunit delta')	sp|P62247|RS8_DANRE(40S ribosomal protein S8 OS=Danio rerio OX=7955 GN=rps8 PE=2 SV=2)	PF01201(Ribosomal_S8e:Ribosomal protein S8e)
TRINITY_DN31365_c0_g1	Cluster 3	hypothetical protein BRARA_I04928, partial [Brassica rapa]	0.467922	-1.09566	0.00702689	0.0389953	yes	down	GO:0016021(cellular_component:integral component of membrane)
TRINITY_DN13389_c0_g1	Cluster 3	spermidine synthase 1-like [Punica granatum]	0.442063	-1.17768	0.00780403	0.0422	yes	down	GO:0016740(molecular_function:transferase activity); GO:0006596(biological_process:polyamine biosynthetic process); GO:0004766(molecular_function:spermidine synthase activity)	K00797	speE, SRM, SPE3	map00270(Cysteine and methionine metabolism); map00480(Glutathione metabolism); map00330(Arginine and proline metabolism)	COG0421(E:Amino acid transport and metabolism)	COG0421(Catalyzes the production of spermidine from putrescine and decarboxylated S-adenosylmethionine (dcSAM), which serves as an aminopropyl donor (By similarity))	sp|Q96556|SPDS1_DATST(Spermidine synthase 1 OS=Datura stramonium OX=4076 PE=2 SV=1)	PF01564(Spermine_synth:Spermine/spermidine synthase domain); PF13649(Methyltransf_25:Methyltransferase domain); PF17284(Spermine_synt_N:Spermidine synthase tetramerisation domain)
TRINITY_DN11765_c0_g1	Cluster 3	hypothetical protein CRG98_047490 [Punica granatum]	0.409698	-1.28737	0.00894427	0.0467081	yes	down	GO:0006606(biological_process:protein import into nucleus); GO:0016021(cellular_component:integral component of membrane); GO:0008536(molecular_function:Ran GTPase binding); GO:0005634(cellular_component:nucleus)
TRINITY_DN11384_c0_g1	Cluster 3	hypothetical protein POPTR_008G040900 [Populus trichocarpa]	0.319375	-1.64668	0.00899553	0.0468923	yes	down	GO:0016021(cellular_component:integral component of membrane)
TRINITY_DN14176_c0_g1	Cluster 3		0.296652	-1.75315	0.00901051	0.0469374	yes	down
